# Supplementary material for: Association of proton pump inhibitor use with risk of kidney stones: an analysis of cross-sectional data from the US National Health and Nutrition Examination Survey (2007–2018)
Source: PubMed Central journal article supplement — BMJ Open. 2023 Oct 16;13(10):e075136. doi: 10.1136/bmjopen-2023-075136 (PMC10582914; doi:10.1136/bmjopen-2023-075136), 2023-10-16
Supplement: bmjopen-2023-075136.draft_revisions.pdf [file bmjopen-2023-075136.draft_revisions.pdf]

# BMJ Open

BMJ Open is committed to open peer review. As part of this commitment we make the peer review history of every article we publish publicly available.

When an article is published we post the peer reviewers' comments and the authors' responses online. We also post the versions of the paper that were used during peer review. These are the versions that the peer review comments apply to.

The versions of the paper that follow are the versions that were submitted during the peer review process. They are not the versions of record or the final published versions. They should not be cited or distributed as the published version of this manuscript.

BMJ Open is an open access journal and the full, final, typeset and author-corrected version of record of the manuscript is available on our site with no access controls, subscription charges or pay-per-view fees (<http://bmjopen.bmj.com>).

If you have any questions on BMJ Open's open peer review process please email [info.bmjopen@bmj.com](mailto:info.bmjopen@bmj.com)

# BMJ Open

## Association of Proton Pump Inhibitor Use with the risk of kidney stones in NHANES population

|                               |                                                                                                                                                                                                                                                                                                                                                   |
|-------------------------------|---------------------------------------------------------------------------------------------------------------------------------------------------------------------------------------------------------------------------------------------------------------------------------------------------------------------------------------------------|
| Journal:                      | <i>BMJ Open</i>                                                                                                                                                                                                                                                                                                                                   |
| Manuscript ID                 | bmjopen-2023-075136                                                                                                                                                                                                                                                                                                                               |
| Article Type:                 | Original research                                                                                                                                                                                                                                                                                                                                 |
| Date Submitted by the Author: | 27-Apr-2023                                                                                                                                                                                                                                                                                                                                       |
| Complete List of Authors:     | liu, wen; Chinese Academy of Medical Sciences & Peking Union Medical College,<br>Wang, Jia; The Affiliated Hospital of Qingdao University, Department of Gastroenterology<br>Wang, Miao; Beijing Hospital, Department of Urology<br>Wang, Miaomiao; Beijing Hospital, Department of Urology<br>Liu, Ming; Beijing Hospital, Department of Urology |
| Keywords:                     | Risk Factors, Urolithiasis < UROLOGY, Adverse events < THERAPEUTICS                                                                                                                                                                                                                                                                               |
|                               |                                                                                                                                                                                                                                                                                                                                                   |

SCHOLARONE™  
Manuscripts

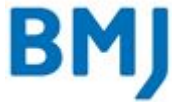

I, the Submitting Author has the right to grant and does grant on behalf of all authors of the Work (as defined in the below author licence), an exclusive licence and/or a non-exclusive licence for contributions from authors who are: i) UK Crown employees; ii) where BMJ has agreed a CC-BY licence shall apply, and/or iii) in accordance with the terms applicable for US Federal Government officers or employees acting as part of their official duties; on a worldwide, perpetual, irrevocable, royalty-free basis to BMJ Publishing Group Ltd ("BMJ") its licensees and where the relevant Journal is co-owned by BMJ to the co-owners of the Journal, to publish the Work in this journal and any other BMJ products and to exploit all rights, as set out in our [licence](#).

The Submitting Author accepts and understands that any supply made under these terms is made by BMJ to the Submitting Author unless you are acting as an employee on behalf of your employer or a postgraduate student of an affiliated institution which is paying any applicable article publishing charge ("APC") for Open Access articles. Where the Submitting Author wishes to make the Work available on an Open Access basis (and intends to pay the relevant APC), the terms of reuse of such Open Access shall be governed by a Creative Commons licence – details of these licences and which [Creative Commons](#) licence will apply to this Work are set out in our licence referred to above.

Other than as permitted in any relevant BMJ Author's Self Archiving Policies, I confirm this Work has not been accepted for publication elsewhere, is not being considered for publication elsewhere and does not duplicate material already published. I confirm all authors consent to publication of this Work and authorise the granting of this licence.

# Association of Proton Pump Inhibitor Use with the risk of kidney stones in NHANES population

Wen Liu<sup>1,2†</sup>, Jia Wang<sup>3†</sup>, Miao Wang<sup>1</sup>, Miaomiao Wang<sup>1,2</sup>, and Ming Liu<sup>1,2\*</sup>

1 Department of Urology, Beijing Hospital, National Center of Gerontology, Institute of Geriatric Medicine, Chinese Academy of Medical Sciences, Beijing, China.

2 Graduate School of Peking Union Medical College, Chinese Academy of Medical Sciences, Beijing, China.

3 Department of Gastroenterology, The Affiliated Hospital of Qingdao University, Qingdao, Shandong, China.

† Both authors contributed equally to this work

\* Correspondence: Ming Liu, Department of Urology, Beijing Hospital, National Center of Gerontology, Institute of Geriatric Medicine, Chinese Academy of Medical Sciences, No.1 DaHua Road, Dong Dan, Beijing, 100730, China.

E-mail: liumingbjh@126.com

## Abstract

**Objective** Several studies have suggested a potential link between proton pump inhibitors (PPIs) use and the risk of kidney stones, attributed to alterations in urine mineral levels. Our study aimed to investigate the association between PPI use and kidney stones in US adults.

**Design** Cross-sectional study.

**Setting** National Health and Nutrition Examination Survey (NHANES) (2007–2018).

**Participants** A total of 27,075 individuals with complete information for PPI use and history of kidney stones were included in this study.

**Primary and secondary outcome measures** Nonlinear analysis, logistic regression analysis, and subgroup analysis were conducted to estimate the relationship of PPI use with incident and recurrent kidney stones, after adjusting for potential confounding factors.

**Results** Multivariate logistic regression analysis revealed a significant association between PPI use and incident kidney stones (odds ratio [OR] 1.31, 95%CI 1.07–1.60), with a 4% increase in the incidence of kidney stones for each additional year of PPI use ( $P < 0.001$ ). Similarly, PPI use was significantly associated with recurrent kidney stones (OR 1.49, 95%CI 1.04–2.13), with a 7%

1  
2  
3  
4 31 increase in the incidence of recurrent kidney stones for each additional year of PPI use ( $P < 0.001$ ).  
5  
6 32 Furthermore, these associations remained significant even after conducting propensity score  
7  
8 33 matching analysis on a subset of PPI users and non-users (all  $P \leq 0.001$ ). Subgroup analyses showed  
9  
10 34 that the effects of PPI use on kidney stones differed by age, sex, race, and BMI.

11 35 **Conclusions** This study indicated that long-term use of PPI was associated with a higher risk of  
12  
13 36 both incident and recurrent kidney stones.

14  
15 37 **Keywords:** NHANES; urolithiasis; proton pump inhibitors; risk factors; drug effects  
16  
17 38

### 19 39 **STRENGTHS AND LIMITATIONS OF THIS STUDY**

20  
21 40 The NHANES dataset comprises a representative sample of the national population to ensure that  
22  
23 41 our findings can be extrapolated to the broader population.

24  
25 42 This is the first study to explore the positive relationship between PPI use and recurrent kidney  
26  
27 43 stones in patients with history of nephrolithiasis.

28  
29 44 Multiple potential confounders were adjusted and PSM design was performed to ensure the  
30  
31 45 reliability of the results.

32  
33 46 It is difficult to draw causal conclusions from such cross-sectional analyses.

34  
35 47 NHANES may did not record information regarding the time and type of kidney stones and the  
36  
37 48 dosage and type of PPI use.  
38  
39 49

### 40 50 **Introduction**

41  
42 51 Kidney stone is a common disease in US, with a high prevalence of 12% of men and 10% of  
43  
44 52 women, and caused high cost and morbidity(1, 2). Some drugs may affect the risk of kidney  
45  
46 53 stones by altering active compounds crystallizing in urine or substances impairing urine  
47  
48 54 composition(3-5).

49  
50 55 Proton pump inhibitors (PPIs) are commonly prescribed medications worldwide for the  
51  
52 56 treatment of gastric acid-related diseases such as gastroesophageal reflux disease (GERD), H.  
53  
54 57 pylori infection, and gastric ulcers(6). However, the escalating prevalence of PPI overuse,  
55  
56 58 especially for long-term therapy, has become a concerning issue(6, 7). Long-term PPI intake is  
57  
58 59 associated with a reduction in intestinal absorption of essential vitamins and minerals and  
59  
60 60 increased susceptibility to infections, chronic kidney disease, and dementia(7). Given that PPI can

1  
2  
3  
4 61 inhibit gastric acid secretion, thereby affecting the intestinal absorption of essential minerals and  
5  
6 62 altering the levels of calcium, magnesium, and citrate(8, 9), several studies have investigated the  
7  
8 63 impact of PPI use on the risk of kidney stones(10-12). For instance, Sui et al. found that PPI use  
9  
10 64 might elevate the risk of kidney stones by lowering the levels of urinary citrate and magnesium,  
11  
12 65 which could compromise their inhibitory effect on kidney stone formation(11). However, it should  
13  
14 66 be noted that all participants in their study were GERD patients. Similarly, Simonov et al.  
15  
16 67 identified a correlation between PPI use and kidney stones primarily based on a sample of young  
17  
18 68 individuals and males(10), thereby limiting the generalizability of their findings to not only the  
19  
20 69 general population but also specific patient groups, such as recurrent stone formers(13).

21 70 This study aimed to investigate the potential association between PPI use and kidney stones  
22  
23 71 by analyzing National Health and Nutrition Examination Survey (NHANES) data from 2007 to  
24  
25 72 2018. Our hypothesis was that PPI use increases the risk of both kidney stone formation and  
26  
27 73 recurrence.

## 28 29 74 **Materials and methods**

### 30 31 75 **Study Population and Design**

32  
33 76 The NHANES is an ongoing cross-sectional survey that employs a sophisticated multistage  
34  
35 77 sample methodology to investigate the health and nutritional status of the non-institutionalized  
36  
37 78 population in US. The protocol was approved by the National Center for Health Statistics (NCHS)  
38  
39 79 Ethics Review Board, and informed consent was obtained from all participants. Additional  
40  
41 80 information regarding data collection can be accessed on the NHANES website(14).

42  
43 81 Six NHANES cycles were used in the study from 2007 to 2018. Initially, 34,709 participants  
44  
45 82 aged 20 years and older were included. However, some participants were excluded: 372 participants  
46  
47 83 who were pregnant, 90 participants with incomplete kidney stone questionnaire, and 7,026  
48  
49 84 participants with incomplete variables. In addition, given the limited number of participants who  
50  
51 85 had taken PPI for more than 15 years, the standard errors for model estimates increased  
52  
53 86 substantially(15), thus 146 participants were excluded. Finally, 27,075 participants were included  
54  
55 87 in the analysis, consisting of 13,711 females and 13,364 males. Fig. 1 illustrates the filtering process  
56  
57 88 used in this study.

### 58 59 89 **Assessment of Outcomes**

60 90 The primary outcome was the response to the question, "Have you ever had kidney stones?"

1  
2  
3  
4 91 (NHANES 2007–2018). Participants who responded “yes” were defined as kidney stone formers.  
5  
6 92 The secondary outcome was the response to the question, “How many times have you passed a  
7  
8 93 kidney stone?” (NHANES 2007–2014). Participants who reported passing at least two stones were  
9  
10 94 classified as recurrent stone formers.

### 11 95 **Medication Use**

12  
13 96 The independent variables in this study were whether participants had taken PPI and the  
14  
15 97 duration of their PPI use. Information on the types and duration of acid suppressant medication was  
16  
17 98 obtained through prescription medication questionnaires. The types of PPI in this study included  
18  
19 99 omeprazole, esomeprazole, lansoprazole, pantoprazole, and rabeprazole. For participants using PPI,  
20  
21 100 the duration of use was equal to the years since initiating therapy. Participants who did not use PPI  
22  
23 101 had a duration of use recorded as zero. Data on specific dosages or previously discontinued  
24  
25 102 prescription medications were unavailable.

### 26 27 103 **Ascertainment of Covariates**

28  
29 104 The study collected three types of detailed information about covariates through standardized  
30  
31 105 personal interviews. The first group included demographic factors including age, sex, race,  
32  
33 106 education level, smoking status, and alcohol consumption. The second group consisted of factors  
34  
35 107 that impact the body's metabolism level, including body mass index (BMI), mean arterial pressure,  
36  
37 108 HbA1c, triglyceride levels, history of cardiovascular disease (CVD), thiazide use, loop diuretic use,  
38  
39 109 and histamine-2 receptor antagonists (H2RA) use. The third group focused on risk factors related to  
40  
41 110 kidney stone formation, including sedentary time, total water intake, albumin-adjusted calcium  
42  
43 111 levels, estimated glomerular filtration rate (eGFR), and history of gout. History of CVD (including  
44  
45 112 congestive heart failure, coronary heart disease, myocardial infarction, and stroke) was defined if  
46  
47 113 participants self-reported a history of these conditions. Gout was defined as a self-reported diagnosis  
48  
49 114 of gout, and/or the use of anti-gout medication.

### 50 115 **Statistical Analyses**

51  
52 116 All statistical analyses considered NHANES survey design characteristics with sampling  
53  
54 117 weights. Descriptive statistics were used to evaluate the demographic and clinic characteristics of  
55  
56 118 the study population. The variance inflation factor (VIF) was utilized to evaluate multicollinearity  
57  
58 119 among covariates and between covariates and kidney stones. A VIF value over 10 indicates  
59  
60 120 multicollinearity, but none was observed in this study (Supplementary Table 1) (16). To explore the

1  
2  
3  
4 121 relationship between PPI use and kidney stones, we performed four weighted logistics regression  
5 122 models and controlled for the aforementioned explanatory variables by modeling PPI as continuous  
6 123 variables based on the time of use. To evaluate the potential non-linear relationship between the  
7 124 time of PPI use and kidney stones, restricted cubic splines were used with three knots at the 5th,  
8 125 50th, and 95th centiles. Subgroup analyses were also performed to explore whether the relationship  
9 126 between the time of PPI use and kidney stones differed by age, sex, race, and BMI, and potential  
10 127 effect modifiers were tested using the Wald test for multiplicative interactions. Additionally, a 1:1  
11 128 propensity score matching (PSM) analysis was performed to balance population differences  
12 129 between PPI users and non-users while adjusting for all confounding variables. We conducted a  
13 130 meta-analysis using the 'meta' package, which allowed us to combine data from relevant studies and  
14 131 estimate an overall effect size for the association between PPI use and kidney stones. All statistical  
15 132 tests were two-sided, and P-values < 0.05 (two-sided) were considered statistically significant. R  
16 133 4.2.2 software was used for modeling.

## 134 **Results**

### 135 **Population Characteristics**

136 This study included 27,075 participants aged 20 years and older from the NHANES database  
137 (2007–2018), representing 203,076,872 adults. And table 1 presents their demographic and clinic  
138 characteristics based on PPI use. The mean age of all participants was  $47.46 \pm 0.26$  (standard  
139 error) years, with roughly equal representation of females (51.13%) and males (48.87%). PPI  
140 users were more likely to be older, females, non-Hispanic white, obese, have lower education  
141 level, alcohol consumption, total water intake, eGFR, higher sedentary time, mean arterial  
142 pressure, HbA1c, triglycerides, albumin-adjusted calcium. PPI users were taking more thiazide,  
143 loop diuretics, and H2RAs medications compared to non-users. Furthermore, CVD, gout and  
144 kidney stone diseases were more common in PPI users (all  $P < 0.05$ ).

### 145 **Multivariate Logistics Regression Analysis**

146 Weighted univariate and multivariate-adjusted logistics regression models were used to  
147 investigate the independent association between PPI use and incident kidney stones, with PPI non-  
148 user as the reference group (Table 2). In the crude model, PPI use showed a significantly positive  
149 association with incident kidney stones ( $OR = 1.86$ ,  $95\%CI = 1.55-2.22$ ). Moreover, the incidence  
150 of kidney stones increased by 9% for each additional year of PPI use. In the fully adjusted model



1  
2  
3  
4 151 (model 3), PPI use still maintained a significantly positive association with incident kidney stones  
5  
6 152 ( $OR = 1.31$ ,  $95\%CI = 1.07-1.60$ ), and for each additional year of PPI use, the incidence of kidney  
7  
8 153 stones increased by 4%. Additionally, we also explored the association between PPI use and  
9  
10 154 recurrent kidney stones. In the crude model, PPI use showed a significantly positive association  
11  
12 155 with recurrent kidney stones ( $OR = 1.49$ ,  $95\%CI = 1.05-2.09$ ), and for each additional year of PPI  
13  
14 156 use, the incidence of recurrent kidney stones increased by 7%. In the fully adjusted model (model  
15  
16 157 3), PPI use still maintained a significantly positive association with recurrent kidney stones ( $OR =$   
17  
18 158  $1.49$ ,  $95\%CI = 1.04-2.13$ ). The incidence of recurrent kidney stones increased by 7% for each  
19  
20 159 additional year of PPI use.

### 21 160 **Dose-response Relationships Between the Time of PPI Use and Kidney Stones**

22  
23 161 According to the restricted cubic spline analyses, a significantly positive relationship was  
24  
25 162 observed between the duration of PPI use and incident kidney stones ( $P$  for overall  $< 0.001$ ,  $P$  for  
26  
27 163 non-linearity = 0.651) (Fig. 2A) and recurrent kidney stones ( $P$  for overall = 0.001,  $P$  for non-  
28  
29 164 linearity = 0.484) (Fig. 2B).

### 30 165 **Subgroup Analyses**

31  
32  
33 166 Moreover, subgroup analyses were performed to assess whether the relationship between the  
34  
35 167 duration of PPI use and kidney stones were influenced by age, sex, race, and BMI (Table 3). After  
36  
37 168 adjusting for all covariates, it was found that the duration of PPI use was significantly associated  
38  
39 169 with incident kidney stones in participants aged 50 years or older, females, non-Hispanic White,  
40  
41 170 and those with a BMI of 25 kg/m<sup>2</sup> or higher. On the other hand, a significant positive association  
42  
43 171 between time of PPI use and recurrent kidney stones was observed only in participants non-Hispanic  
44  
45 172 White, and those with a BMI of 25 kg/m<sup>2</sup> or higher (all  $P$  for interaction  $> 0.05$ ).

### 46 173 **Sensitivity Analyses**

47  
48  
49 174 A 1:1 matched cohort analysis was conducted through PSM to minimize potential bias, given  
50  
51 175 the significant difference in PPI use and non-use group (Table 1). This approach confirmed 4864  
52  
53 176 participants in the matched cohort. The descriptive statistics results showed that no significant  
54  
55 177 differences observed in most variables between the PPI non-user and PPI user groups  
56  
57 178 (Supplementary Table 2). In the fully adjusted model, the dose-response curve still displayed a  
58  
59 179 positive association between the duration of PPI use and kidney stones ( $OR = 1.05$ ,  $95\%CI = 1.02-$   
60  
180  $1.08$ ,  $P$  for overall  $< 0.001$ ,  $P$  for non-linearity = 0.956) (Supplementary Fig. 1A) and recurrent

1  
2  
3  
4 181 kidney stones ( $OR = 1.10$ ,  $95\%CI = 1.02-1.18$ ,  $P$  for overall = 0.001,  $P$  for non-linearity = 0.488)  
5  
6 182 (Supplementary Fig. 1B).

### 7 183 **Discussion**

8  
9 184 In this large cross-sectional study based on NHANES data from 2007 to 2018, we found that  
10  
11 185 PPI use was significantly associated with an increased risk of incident kidney stones. The duration  
12  
13 186 of PPI use demonstrated a dose-response association with incident kidney stones. Furthermore, our  
14  
15 187 study uncovered a novel association between long-term PPI use and recurrent kidney stones in  
16  
17 188 patients with a history of kidney stones, demonstrating a significant linear correlation. Additionally,  
18  
19 189 subgroup analysis found that the effects of age, sex, race, and BMI varied in their influence on the  
20  
21 190 relationship between PPI use and incident kidney stones.

22  
23 191 Several studies have shown that PPI use could increase the risk of kidney stones, with a dose-  
24  
25 192 response relationship(10-12). A retrospective study conducted on the Women's Veterans Cohort,  
26  
27 193 which included 465,891 individuals, revealed that PPI use was linked to a 1.25-fold higher risk of  
28  
29 194 kidney stones ( $95\% CI = 1.19-1.33$ ) (Supplementary Fig. 2)(10). It should be noted that this study  
30  
31 195 included mainly young individuals (with a median age of 32 years) and was predominantly males  
32  
33 196 (86%), thus having a certain degree of selection bias(13). Another study by Sui et al. also found a  
34  
35 197 positive association between PPI use and kidney stones in patients with GERD, with a 1.46-fold  
36  
37 198 increased risk ( $95\%CI = 1.38-1.55$ ), which could help in assessing the potential risk of kidney  
38  
39 199 stones associated with PPI exposure (Supplementary Fig. 2)(11). Nevertheless, both studies were  
40  
41 200 limited to specific populations, limiting the generalizability of their findings to the general  
42  
43 201 population. In contrast, a nationwide population cohort from Korea, without selection bias, also  
44  
45 202 showed a positive association between PPI use and kidney stones, displaying a dose-response  
46  
47 203 relationship(12). Similarly, the current study, based on data from the NHANES database  
48  
49 204 representing over 203 million individuals, found that PPI use was significantly associated with not  
50  
51 205 only a higher risk of incident kidney stones, but also recurrent kidney stones. Furthermore, the risk  
52  
53 206 of developing kidney stones was found to be higher in individuals who used PPI for a longer  
54  
55 207 duration, highlighting the importance of monitoring this potential side effects of long-term PPI  
56  
57 208 treatment, especially for patients with a history of kidney stones.

58 209 The mechanisms underlying the impact of PPI on kidney stone formation remain unclear.  
59  
60 210 Studies have suggested that PPI can elevate gastric pH, leading to a decrease in magnesium

1  
2  
3  
4 211 absorption and urinary magnesium levels(9). Magnesium has been known to inhibit the formation  
5  
6 212 of calcium oxalate crystals in urine(17, 18). A meta-analysis of nine observational studies found a  
7  
8 213 significant increased risk of hypomagnesemia among patients using PPI(19). It should be noted that  
9  
10 214 magnesium absorption occurs through both active and passive mechanisms, and alterations in pH  
11  
12 215 do not affect passive absorption(19). Therefore, PPI use does not always result in hypomagnesemia,  
13  
14 216 but patients with impaired gastrointestinal absorptive capacity may have an increased risk of  
15  
16 217 developing hypomagnesemia. On the other hand, research has shown that citrate can inhibit the  
17  
18 218 crystallization of calcium salts in urine, and a deficiency of citrate can increase the risk of stone  
19  
20 219 formation(20, 21). A study of 301 nephrolithiasis patients with 24-hour urine data found that PPI  
21  
22 220 exposure significantly reduced urinary citrate excretion, but did not affect urinary magnesium, pH,  
23  
24 221 or other urinary minerals(8). Similarly, another study on GERD patients reported a significant  
25  
26 222 correlation between PPI use and lower levels of urinary citrate and magnesium(11). Therefore, given  
27  
28 223 the association between PPI use and hypomagnesemia and hypocitraturia, it may monitor the levels  
29  
30 224 of urinary magnesium and citrate when using PPI.

31 225 PPIs are commonly prescribed for acid-related disorders, and patients with these conditions  
32  
33 226 may be at higher risk for kidney stone formation(22). In this study, we employed the PSM analysis  
34  
35 227 to minimize potential differences between PPI users and non-users, yet still identified a significant  
36  
37 228 association between PPI use and incident and recurrent kidney stones. Subgroup analyses further  
38  
39 229 revealed that certain patient groups, including the elderly, females, non-Hispanic Whites, and those  
40  
41 230 with a BMI of 25 kg/m<sup>2</sup> or higher, exhibited a stronger positive association between PPI use and  
42  
43 231 incident kidney stones, highlighting the importance of considering potential side effects of PPI use  
44  
45 232 in these populations. While it is undeniable that PPI therapy has improved the quality of life for  
46  
47 233 many patients with acid-related disorders(23), a growing body of literature suggested a relationship  
48  
49 234 between long-term PPI use and adverse events(24). Caution should be exercised when discontinuing  
50  
51 235 PPI use for evidence-based indications(25), but global concerns over long-term PPI overuse should  
52  
53 236 not be overlooked(6, 7), especially in individuals with a history of kidney stones and high-risk  
54  
55 237 factors, such as the elderly, females, non-Hispanic Whites, and those with a BMI of 25 kg/m<sup>2</sup> or  
56  
57 238 higher, in order to reduce unnecessary use.

58 239 This study has several strengths. Firstly, the NHANES dataset comprises a representative  
59  
60 240 sample of the national population, and we utilize NHANES-provided weights to ensure that our

1  
2  
3  
4 241 findings can be extrapolated to the broader population. Secondly, this is the first study to explore  
5  
6 242 the positive relationship between PPI use and recurrent kidney stones in patients with history of  
7  
8 243 nephrolithiasis. Furthermore, multiple potential confounders were adjusted and PSM design was  
9  
10 244 performed to ensure the reliability of the results. However, this study also has several limitations.  
11  
12 245 Firstly, it is difficult to draw causal conclusions from such cross-sectional analyses. Although we  
13  
14 246 adjusted for three types of detailed covariate information, there may still be unmeasured potential  
15  
16 247 factors that could affect the association between PPI and nephrolithiasis. Secondly, the  
17  
18 248 questionnaire survey may have been prone to recall bias and reporting bias, which could affect the  
19  
20 249 accuracy of the data collected. Thirdly, NHANES may have missed some asymptomatic kidney  
21  
22 250 stones without physical examination and did not record information regarding the time and type of  
23  
24 251 kidney stones. Finally, the lack of information about the dosage and type of PPI use may limit the  
25  
26 252 interpretability of the results.

### 27 253 **Conclusions**

28  
29 254 In conclusion, our study demonstrated a significant relationship between PPI use and incident  
30  
31 255 kidney stones, as well as an increased risk of recurrent kidney stones in patients with a history of  
32  
33 256 nephrolithiasis. To mitigate this potential adverse effect, caution should be exercised regarding  
34  
35 257 unnecessary long-term use of PPI.

36  
37 258

### 38 39 259 **Acknowledgments**

40  
41 260 We appreciate the American Centers for Disease Control and Prevention for conducting the survey and  
42  
43 261 making it available online freely, and all the participants for providing these data.

### 44 45 262 **Contributors**

46  
47 263 W-L: conceptualization, methodology, data analysis, manuscript writing; J-W: methodology, data  
48  
49 264 collection, data analysis, manuscript writing; M-W: methodology, data collection, data analysis; MM-  
50  
51 265 W: data analysis, manuscript writing, supervision; M-L: conceptualization, supervision, manuscript  
52  
53 266 editing, funding acquisition.

### 54 55 267 **Funding**

56  
57 268 This work was supported by the National Key Research and Development Program of China  
58  
59 269 [2022YFC3602900] and National High Level Hospital Clinical Research Funding [BJ-2022-115].

### 60 270 **Competing interests**

1  
2  
3  
4 271 None declared

5 272 **Patient and public involvement**

7 273 Patients and/or the public were not involved in the design, or conduct, or reporting, or dissemination  
8  
9 274 plans of this research.

11 275 **Patient consent for publication**

13 276 Not applicable.

15 277 **Ethical statement**

17 278 The studies involving human participants were reviewed and approved by the Ethics Review Board of  
18  
19 279 the NCHS (Protocol #98-12). The patients/participants provided their written informed consent to  
20  
21 280 participate in this study.

23 281 **Data availability statement**

25 282 Publicly available datasets were analyzed in this study. This data can be downloaded here:

27 283 <https://www.cdc.gov/nchs/nhanes/> (NHANES 2005-2006 and 2007-2008).  
28  
29 284

31 285 **References**

33 286 1. Saigal CS, Joyce G, Timilsina AR. Direct and indirect costs of nephrolithiasis in an employed  
34  
35 287 population: opportunity for disease management? *Kidney Int.* 2005;68(4):1808-14.

37 288 2. Abufaraj M, Xu T, Cao C, Waldhoer T, Seitz C, D'Andrea D, et al. Prevalence and Trends in Kidney  
38  
39 289 Stone Among Adults in the USA: Analyses of National Health and Nutrition Examination Survey 2007-  
40  
41 290 2018 Data. *Eur Urol Focus.* 2021;7(6):1468-75.

43 291 3. Dauw CA, Yi Y, Bierlein MJ, Yan P, Alruwaily AF, Ghani KR, et al. Factors Associated With Preventive  
44  
45 292 Pharmacological Therapy Adherence Among Patients With Kidney Stones. *Urology.* 2016;93:45-9.

47 293 4. Daudon M, Frochet V, Bazin D, Jungers P. Drug-Induced Kidney Stones and Crystalline  
48  
49 294 Nephropathy: Pathophysiology, Prevention and Treatment. *Drugs.* 2018;78(2):163-201.

51 295 5. Cohen AJ, Adamsky MA, Nottingham CU, Pruitt J, Lapin B, Wang CH, et al. Impact of Statin Intake  
52  
53 296 on Kidney Stone Formation. *Urology.* 2019;124:57-61.

54 297 6. Savarino V, Marabotto E, Zentilin P, Furnari M, Bodini G, De Maria C, et al. Proton pump inhibitors:  
55  
56 298 use and misuse in the clinical setting. *Expert Rev Clin Pharmacol.* 2018;11(11):1123-34.

58 299 7. Eusebi LH, Rabitti S, Artesiani ML, Gelli D, Montagnani M, Zagari RM, et al. Proton pump inhibitors:  
59  
60 300 Risks of long-term use. *J Gastroenterol Hepatol.* 2017;32(7):1295-302.

- 1  
2  
3  
4 301 8. Patel PM, Kandabarow AM, Aiwerioghene E, Blanco-Martinez E, Hart S, Leehey DJ, et al. Proton-  
5  
6 302 pump inhibitors associated with decreased urinary citrate excretion. *Int Urol Nephrol*. 2021;53(4):679-  
7  
8 303 83.
- 9  
10 304 9. Ito T, Jensen RT. Association of long-term proton pump inhibitor therapy with bone fractures and  
11  
12 305 effects on absorption of calcium, vitamin B12, iron, and magnesium. *Curr Gastroenterol Rep*.  
13  
14 306 2010;12(6):448-57.
- 15  
16 307 10. Simonov M, Abel EA, Skanderson M, Masoud A, Hauser RG, Brandt CA, et al. Use of Proton Pump  
17  
18 308 Inhibitors Increases Risk of Incident Kidney Stones. *Clin Gastroenterol Hepatol*. 2021;19(1):72-9.e21.
- 19  
20 309 11. Sui W, Miller NL, Gould ER, Zhang KC, Koyama T, Hsi RS. Proton pump inhibitors use and risk of  
21  
22 310 incident nephrolithiasis. *Urolithiasis*. 2022;50(4):401-9.
- 23  
24 311 12. Kim SY, Yoo DM, Bang WJ, Choi HG. Association between Urolithiasis and History Proton Pump  
25  
26 312 Inhibitor Medication: A Nested Case-Control Study. *J Clin Med*. 2022;11(19).
- 27  
28 313 13. Pella E, Chalkidou M, Sarafidis P. Proton Pump Inhibitors, Histamine-2 Receptor Antagonists, and  
29  
30 314 the Risk of Kidney Stones: Negligible or Not? *Clin Gastroenterol Hepatol*. 2021;19(3):624-5.
- 31  
32 315 14. NHANES Questionnaires, Datasets, and Related Documentation. Available from:  
33  
34 316 <https://www.cdc.gov/nchs/nhanes/Default.aspx>: [Accessed April 14, 2023 pp.].
- 35  
36 317 15. Chang SL, Harshman LC, Presti JC, Jr. Impact of common medications on serum total prostate-  
37  
38 318 specific antigen levels: analysis of the National Health and Nutrition Examination Survey. *J Clin Oncol*.  
39  
40 319 2010;28(25):3951-7.
- 41  
42 320 16. Charidimou A, Martinez-Ramirez S, Reijmer YD, Oliveira-Filho J, Lauer A, Roongpiboonsopit D, et  
43  
44 321 al. Total Magnetic Resonance Imaging Burden of Small Vessel Disease in Cerebral Amyloid Angiopathy:  
45  
46 322 An Imaging-Pathologic Study of Concept Validation. *JAMA Neurol*. 2016;73(8):994-1001.
- 47  
48 323 17. Schwartz BF, Bruce J, Leslie S, Stoller ML. Rethinking the role of urinary magnesium in calcium  
49  
50 324 urolithiasis. *J Endourol*. 2001;15(3):233-5.
- 51  
52 325 18. Johansson G, Backman U, Danielson BG, Fellström B, Ljunghall S, Wikström B. Effects of  
53  
54 326 magnesium hydroxide in renal stone disease. *J Am Coll Nutr*. 1982;1(2):179-85.
- 55  
56 327 19. Cheungpasitporn W, Thongprayoon C, Kittanamongkolchai W, Srivali N, Edmonds PJ, Ungprasert  
57  
58 328 P, et al. Proton pump inhibitors linked to hypomagnesemia: a systematic review and meta-analysis of  
59  
60 329 observational studies. *Ren Fail*. 2015;37(7):1237-41.

- 1  
2  
3  
4 330 20. Goldberg H, Grass L, Vogl R, Rapoport A, Oreopoulos DG. Urine citrate and renal stone disease.  
5 331 *Cmaj*. 1989;141(3):217-21.  
6  
7 332 21. Pak CY. Citrate and renal calculi: an update. *Miner Electrolyte Metab*. 1994;20(6):371-7.  
8  
9 333 22. Bapir R, Bhatti KH, Eliwa A, García-Perdomo HA, Gherabi N, Hennessey D, et al. Risk of urinary  
10 334 stone formation associated to proton pump inhibitors: A systematic review and metanalysis. *Arch Ital*  
11 335 *Urol Androl*. 2022;94(4):507-14.  
12  
13 336 23. Moayyedi P, Armstrong D, Hunt RH, Lei Y, Bukoski M, White RJ. The gain in quality-adjusted life  
14 337 months by switching to esomeprazole in those with continued reflux symptoms in primary care:  
15 338 EncompASS--a cluster-randomized trial. *Am J Gastroenterol*. 2010;105(11):2341-6.  
16  
17 339 24. Elias E, Targownik LE. The Clinician's Guide to Proton Pump Inhibitor Related Adverse Events.  
18 340 *Drugs*. 2019;79(7):715-31.  
19  
20 341 25. Boghossian TA, Rashid FJ, Thompson W, Welch V, Moayyedi P, Rojas-Fernandez C, et al.  
21 342 Deprescribing versus continuation of chronic proton pump inhibitor use in adults. *Cochrane Database*  
22 343 *Syst Rev*. 2017;3(3):Cd011969.

23  
24  
25  
26  
27  
28  
29  
30  
31  
32  
33 345 **Fig. 1** Study flowchart. Of 59,842 participants in the 2007–2018 National Health and Nutrition  
34 346 Examination Survey (NHANES), 27,075 remained after fulfilling inclusion and exclusion criteria.

35  
36 347 **Fig. 2** Dose-response relationships between time of PPIs and kidney stones. (A) Time of PPIs  
37 348 use and kidney stones; (B) Time of PPIs use and recurrent kidney stones.

38  
39 349 Abbreviations: OR, odds ratio; PPIs, proton pump inhibitors. Adjusted for age, sex, race, education  
40 350 level, smoking, alcohol consumption, BMI, mean arterial pressure, HbA1c, triglycerides, history of  
41 351 CVD, gout, thiazide use, loop diuretics use, and H2RAs use, sedentary time, total water intake,  
42 352 albumin-adjusted calcium, and eGFR. The shaded part represents the 95% CI.

43  
44  
45  
46  
47 353 **Supplementary Fig. 1** Dose-response relationships between time of PPIs use and kidney stones  
48 354 after PSM. (A) Time of PPIs use and kidney stones; (B) Time of PPIs use and recurrent kidney  
49 355 stones.

50  
51  
52  
53  
54 356 Abbreviations: OR, odds ratio; PPIs, proton pump inhibitors; PSM, propensity score matching.  
55 357 Adjusted for age, sex, race, education level, smoking, alcohol consumption, BMI, mean arterial  
56 358 pressure, HbA1c, triglycerides, history of CVD, gout, thiazide use, loop diuretics use, and H2RAs  
57 359 use, sedentary time, total water intake, albumin-adjusted calcium, and eGFR. The shaded part



360 represents the 95% CI.

361 **Supplementary Fig. 2** Forest plot showing the association between PPI use and kidney stones.

Table 1. Demographic and clinic characteristics according to PPIs use. NHANES 2007–2018\*

| Characteristics                                                   | Total Adults<br>(N = 27,075) | Non-user<br>(N = 24,643) | PPIs user<br>(N = 2,432) | P value |
|-------------------------------------------------------------------|------------------------------|--------------------------|--------------------------|---------|
| Age, years, mean (SE)                                             | 47.46(0.26)                  | 46.38(0.25)              | 59.05(0.47)              | < 0.001 |
| Female, n (%)                                                     | 13711(51.13)                 | 12335(50.63)             | 1376(56.43)              | < 0.001 |
| Race (Non-Hispanic White), n (%)                                  | 11470(66.93)                 | 10153(65.94)             | 1317(77.61)              | < 0.001 |
| Education, n (%)                                                  |                              |                          |                          | < 0.001 |
| Grades 0–12                                                       | 6368(23.03)                  | 5671(14.72)              | 697(17.85)               |         |
| High school graduate/GED                                          | 6189(14.99)                  | 5593(22.69)              | 596(26.69)               |         |
| Some college or above                                             | 14518(61.98)                 | 13379(62.58)             | 1139(55.46)              |         |
| Smoking <sup>†</sup> , n (%)                                      | 5477(19.65)                  | 5035(19.81)              | 442(17.93)               | 0.143   |
| Alcohol consumption, n (%)                                        | 6469(26.38)                  | 6010(26.73)              | 459(22.63)               | 0.017   |
| BMI, kg/m <sup>2</sup> , mean (SE)                                | 29.05(0.09)                  | 28.88(0.09)              | 30.89(0.22)              | < 0.001 |
| Weight status ( $\geq 25$ kg/m <sup>2</sup> ), n (%) <sup>‡</sup> | 19423(70.54)                 | 17439(69.47)             | 1984(81.95)              | < 0.001 |
| Sedentary time, hours/day, mean (SE)                              | 368.10(2.86)                 | 365.58(2.96)             | 395.13(5.96)             | < 0.001 |
| Mean arterial pressure, mmHg, mean (SE)                           | 87.98(0.16)                  | 87.83(0.17)              | 89.59(0.35)              | < 0.001 |
| Total water intake, g, mean (SE)                                  | 1171.48(15.90)               | 1180.99(16.29)           | 1069.41(30.63)           | < 0.001 |
| HbA1c, %, mean (SE)                                               | 5.63(0.01)                   | 5.61(0.01)               | 5.89(0.03)               | < 0.001 |
| Triglycerides, mmol/L, mean (SE)                                  | 1.75(0.02)                   | 1.73(0.02)               | 1.97(0.04)               | < 0.001 |
| Albumin-adjusted calcium, mmol/L, mean (SE)                       | 2.28(0.00)                   | 2.28(0.00)               | 2.30(0.00)               | < 0.001 |
| eGFR, mL/min, mean (SE)                                           | 94.33(0.33)                  | 95.55(0.33)              | 81.23(0.61)              | < 0.001 |
| Gout, n (%)                                                       | 403(1.25)                    | 309(1.07)                | 94(3.23)                 | < 0.001 |
| CVD, n (%)                                                        |                              |                          |                          |         |
| Congestive heart failure                                          | 805(2.20)                    | 589(1.76)                | 216(6.88)                | < 0.001 |
| Coronary heart disease                                            | 1080(3.34)                   | 829(2.87)                | 251(8.39)                | < 0.001 |
| Myocardial infarction                                             | 1082(3.01)                   | 828(2.56)                | 254(7.82)                | < 0.001 |
| Stroke                                                            | 984(2.78)                    | 788(2.43)                | 196(6.47)                | < 0.001 |
| Thiazide user, n (%)                                              | 2748(8.66)                   | 2256(7.81)               | 492(17.75)               | < 0.001 |
| Loop diuretics user, n (%)                                        | 876(2.46)                    | 626(1.91)                | 250(8.35)                | < 0.001 |
| H2RAs user, n (%)                                                 | 643(2.33)                    | 550(2.26)                | 93(3.12)                 | 0.030   |
| Kidney stones, n (%)                                              | 2589(9.80)                   | 2217(9.23)               | 372(15.88)               | < 0.001 |

362 Abbreviations: NHANES, National Health and Nutrition Examination Survey; PPIs, proton pump inhibitors; SE, standard error;  
 363 GED, General Equivalency Diploma; BMI, body mass index; eGFR, effective glomerular filtration rate; CVD, cardiovascular  
 364 disease; H2RAs, H2-receptor antagonist.

365 \*Means and percentages were adjusted for survey weights of NHANES.

366 †Smoking was defined as smoking at least 100 cigarettes during their lifetime.

367 ‡BMI was calculated by dividing weight in kilograms (kg) by height in meters squared (m<sup>2</sup>). Participants were classified as  
 368 normal weight (BMI < 25 kg/m<sup>2</sup>), and overweight/obese (BMI  $\geq 25$  kg/m<sup>2</sup>).



369

370

Table 2. *OR* (95% *CI*) for kidney stones across PPIs use\*

|                                                                                               | Crude model     | Model 1         | Model 2         | Model 3         |
|-----------------------------------------------------------------------------------------------|-----------------|-----------------|-----------------|-----------------|
| <b>Kidney stones (N = 2,589) VS Non-kidney stone (N = 24,486) (NHANES 2007–2018)</b>          |                 |                 |                 |                 |
| <b>PPIs use</b>                                                                               |                 |                 |                 |                 |
| No                                                                                            | 1[Reference]    | 1[Reference]    | 1[Reference]    | 1[Reference]    |
| Yes                                                                                           | 1.86(1.55,2.22) | 1.42(1.18,1.72) | 1.32(1.09,1.61) | 1.31(1.07,1.60) |
| <b>Time of use (years)</b>                                                                    | 1.09(1.07,1.12) | 1.05(1.02,1.08) | 1.04(1.01,1.07) | 1.04(1.01,1.07) |
| <b>Recurrent kidney stones (N = 550) VS first kidney stone (N = 1,138) (NHANES 2007–2014)</b> |                 |                 |                 |                 |
| <b>PPIs use</b>                                                                               |                 |                 |                 |                 |
| No                                                                                            | 1[Reference]    | 1[Reference]    | 1[Reference]    | 1[Reference]    |
| Yes                                                                                           | 1.49(1.05,2.09) | 1.49(1.05,2.13) | 1.47(1.03,2.10) | 1.49(1.04,2.13) |
| <b>Time of use (years)</b>                                                                    | 1.07(1.01,1.12) | 1.06(1.01,1.12) | 1.06(1.01,1.12) | 1.07(1.01,1.13) |

371 Abbreviations: *OR*, odds ratio; *CI*, confidence interval; PPIs, proton pump inhibitors.372 \*Values are numerical values or weighted *OR* (95% *CI*).

373 Model 1 was adjusted for age, sex, race, education level, smoking, and alcohol consumption;

374 Model 2 was adjusted for age, sex, race, education level, smoking, alcohol consumption, BMI, mean arterial pressure, HbA1c, triglycerides, history of CVD, thiazide use, loop diuretics use, and H2RAs use.

376 Model 3 was additionally adjusted for sedentary time, total water intake, albumin-adjusted calcium, eGFR and history of gout.

377

Table 3. *OR* (95% *CI*) for kidney stones across time of PPIs use stratified by selected factors\*

|                        | Kidney stones VS Non-kidney stone |                |                          | Recurrent kidney stones VS first kidney stone |                |                          |
|------------------------|-----------------------------------|----------------|--------------------------|-----------------------------------------------|----------------|--------------------------|
|                        | <i>OR</i> (95% <i>CI</i> )        | <i>P</i> value | <i>P</i> for interaction | <i>OR</i> (95% <i>CI</i> )                    | <i>P</i> value | <i>P</i> for interaction |
| <b>Age</b>             |                                   |                | 0.439                    |                                               |                | 0.419                    |
| < 50 years             | 1.05(0.98, 1.11)                  | 0.150          |                          | 1.11(0.98, 1.27)                              | 0.104          |                          |
| ≥ 50 years             | 1.04(1.01,1.07)                   | 0.004          |                          | 1.07(1.00,1.14)                               | 0.053          |                          |
| <b>Sex</b>             |                                   |                | 0.856                    |                                               |                | 0.623                    |
| Female                 | 1.06(1.02,1.10)                   | 0.004          |                          | 1.08(0.99,1.18)                               | 0.099          |                          |
| Male                   | 1.02(0.98,1.07)                   | 0.258          |                          | 1.06(0.98,1.14)                               | 0.156          |                          |
| <b>Race</b>            |                                   |                | 0.365                    |                                               |                | 0.282                    |
| Non-Hispanic           |                                   |                |                          |                                               |                |                          |
| White                  | 1.04(1.01,1.07)                   | 0.005          |                          | 1.11(1.01, 1.22)                              | 0.037          |                          |
| Other                  | 1.02(0.98,1.06)                   | 0.422          |                          | 1.07(1.00,1.13)                               | 0.038          |                          |
| <b>BMI</b>             |                                   |                | 0.684                    |                                               |                | 0.922                    |
| < 25 kg/m <sup>2</sup> | 1.06(0.98,1.14)                   | 0.134          |                          | 1.04(0.90, 1.22)                              | 0.569          |                          |
| ≥ 25 kg/m <sup>2</sup> | 1.04(1.01,1.06)                   | 0.013          |                          | 1.07(1.01,1.15)                               | 0.029          |                          |

378 Abbreviations: *OR*, odds ratio; *CI*, confidence interval; PPIs, proton pump inhibitors; BMI, Body mass index.379 \*Values are numerical values or weighted *OR* (95% *CI*).380 Adjusted for age, sex, race, education level, smoking, alcohol consumption, BMI, mean arterial pressure, HbA1c, triglycerides,  
381 history of CVD, gout, thiazide use, loop diuretics use, and H2RAs use, sedentary time, total water intake, albumin-adjusted  
382 calcium, and eGFR, if not already stratified.

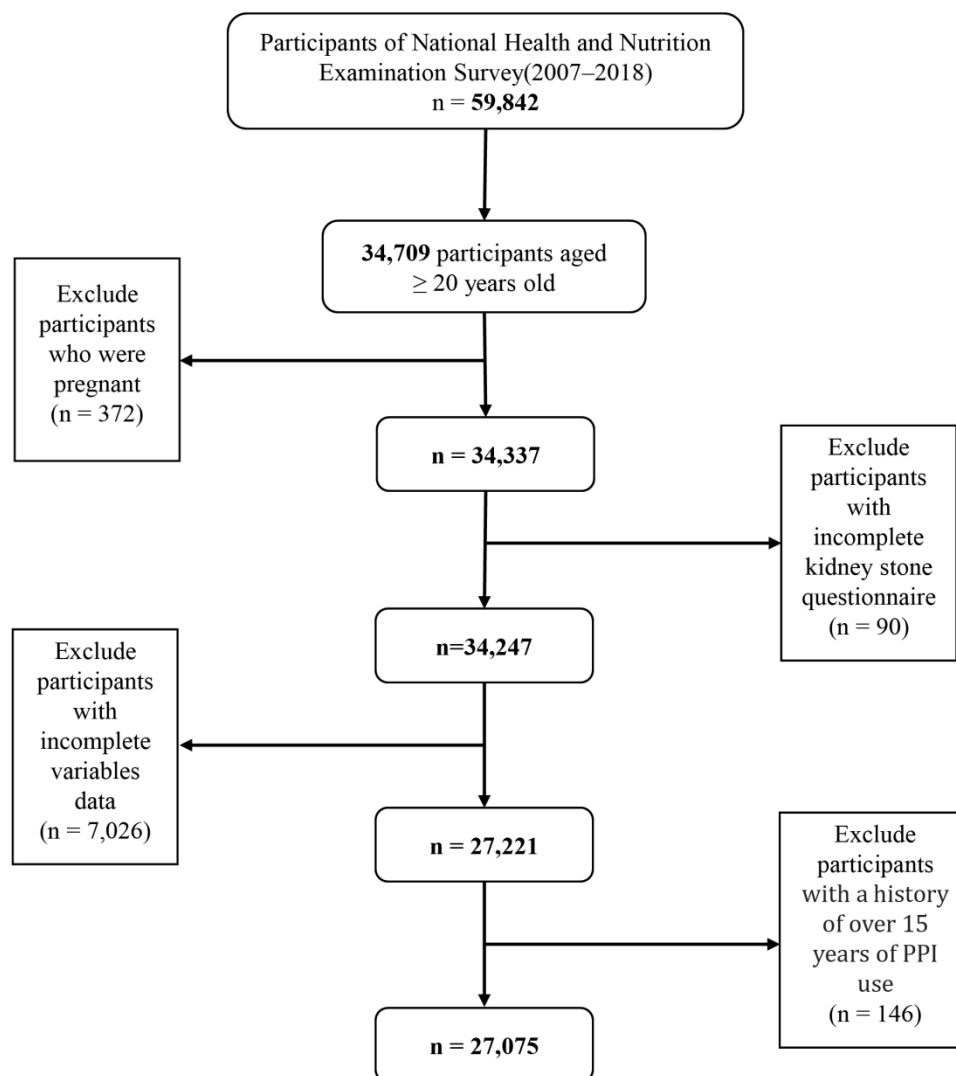

Fig. 1 Study flowchart. Of 59,842 participants in the 2007–2018 National Health and Nutrition Examination Survey (NHANES), 27,075 remained after fulfilling inclusion and exclusion criteria.

169x190mm (300 x 300 DPI)

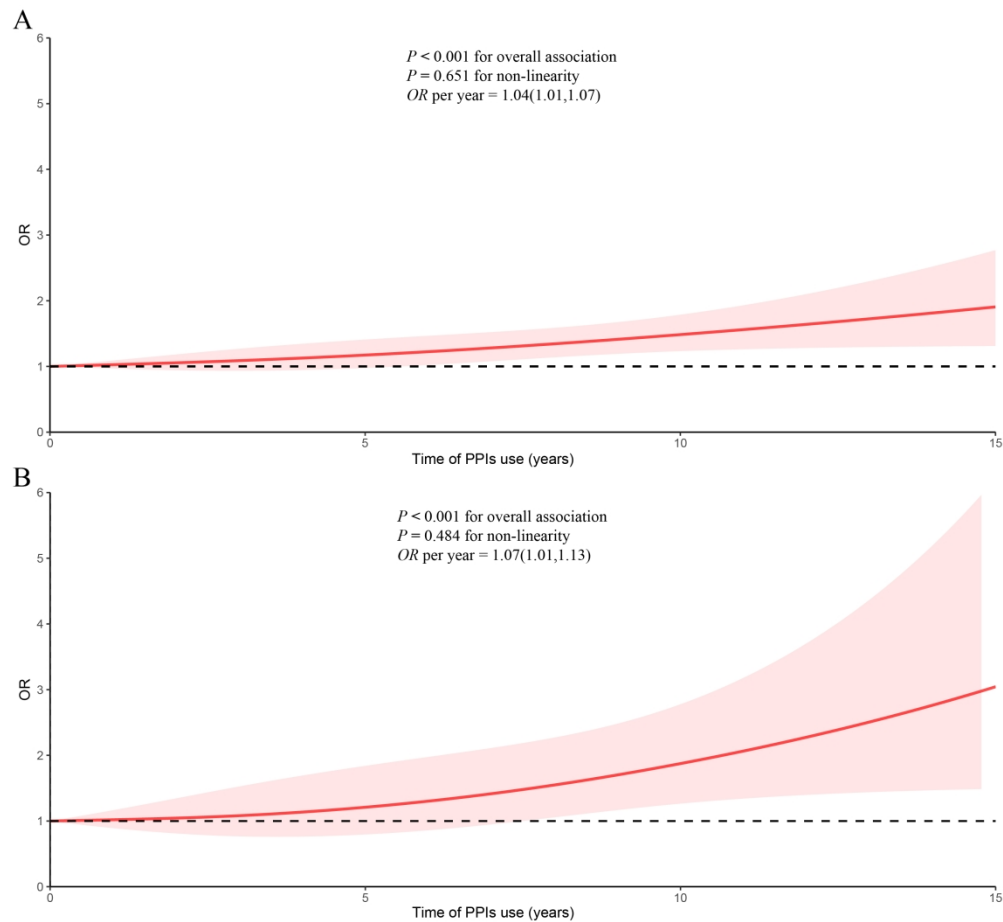

36 Fig. 2 Dose-response relationships between time of PPIs use and kidney stones. (A) Time of PPIs use and  
 37 kidney stones; (B) Time of PPIs use and recurrent kidney stones.

38 Abbreviations: OR, odds ratio; PPIs, proton pump inhibitors. Adjusted for age, sex, race, education level,  
 39 smoking, alcohol consumption, BMI, mean arterial pressure, HbA1c, triglycerides, history of CVD, gout,  
 40 thiazide use, loop diuretics use, and H2RAs use, sedentary time, total water intake, albumin-adjusted  
 41 calcium, and eGFR. The shaded part represents the 95% CI.

42  
43 263x243mm (300 x 300 DPI)  
44  
45  
46  
47  
48  
49  
50  
51  
52  
53  
54  
55  
56  
57  
58  
59  
60

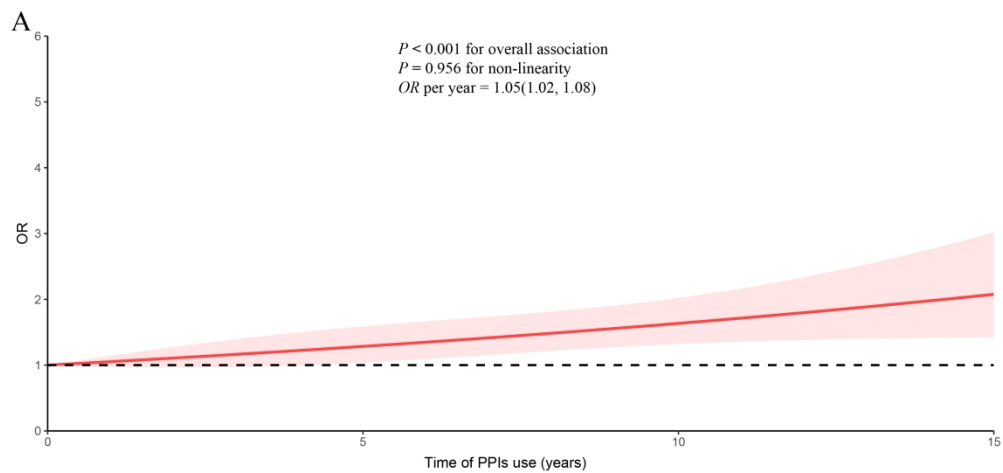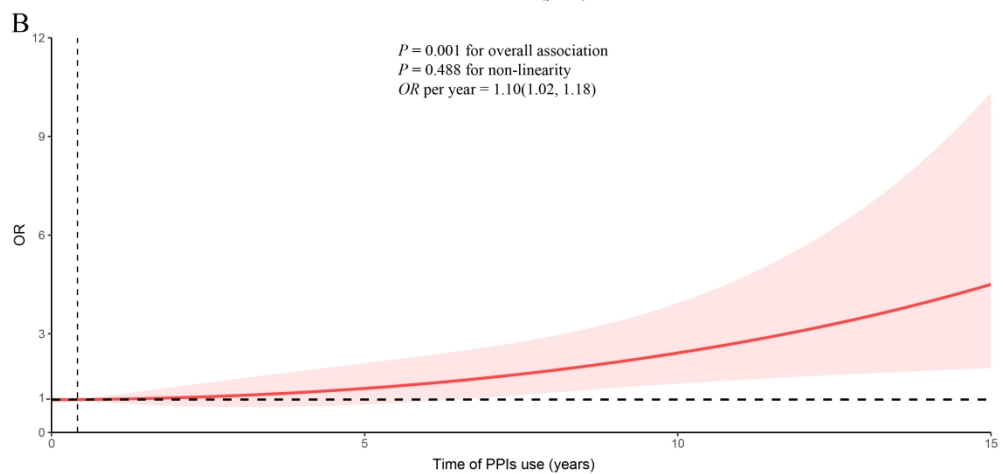

263x246mm (300 x 300 DPI)

| Study                       | HR/OR | HR/OR | 95%CI        | Weight (fixed) | Weight (random) |
|-----------------------------|-------|-------|--------------|----------------|-----------------|
| <b>The present study</b>    |       | 1.31  | [1.07; 1.60] | 3.8%           | 23.7%           |
| Sui et al. 2022             |       | 1.19  | [1.06; 1.34] | 11.2%          | 25.1%           |
| Kim et al. 2022             |       | 2.49  | [2.33; 2.66] | 35.1%          | 25.6%           |
| Simonov et al. 2021         |       | 1.25  | [1.19; 1.33] | 49.8%          | 25.6%           |
| <b>Fixed effect model</b>   |       | 1.59  | [1.53; 1.65] | 100.0%         | --              |
| <b>Random effects model</b> |       | 1.49  | [1.05; 2.10] | --             | 100.0%          |

For peer review only - <http://bmjopen.bmj.com/site/about/guidelines.xhtml>

1 2 3

Supplementary Table 1. Collinearity analysis

| <b>Variables</b>         | <b>VIF</b> |
|--------------------------|------------|
| Age                      | 3.80       |
| Sex                      | 1.54       |
| Race/ethnicity           | 1.85       |
| Education                | 2.50       |
| Smoking                  | 2.08       |
| Alcohol consumption      | 1.75       |
| BMI                      | 1.26       |
| Sedentary time           | 1.54       |
| Mean arterial pressure   | 1.25       |
| Total water intake       | 1.99       |
| HbA1c                    | 1.81       |
| Triglycerides            | 1.44       |
| Albumin-adjusted calcium | 1.97       |
| eGFR                     | 3.72       |
| CVD                      | 1.77       |
| Thiazide use             | 1.78       |
| Loop diuretics use       | 1.56       |
| H2RAs use                | 1.27       |

Abbreviations: VIF, variance inflation factor; BMI, body mass index; eGFR, effective glomerular filtration rate; CVD, cardiovascular disease; H2RAs, H2-receptor antagonist.

Supplementary Table 2. Demographic and clinic characteristics according to PPIs use after PSM. NHANES 2007–2018\*

| Characteristics                                                      | Total Adults<br>(N = 4,864) | Non-user<br>(N = 2,432) | PPIs user<br>(N = 2,432) | P value |
|----------------------------------------------------------------------|-----------------------------|-------------------------|--------------------------|---------|
| Age, years, mean (SE)                                                | 59.15(0.35)                 | 59.24(0.42)             | 59.05(0.47)              | 0.733   |
| Female, n (%)                                                        | 2679(56.73)                 | 1303(57.02)             | 1376(56.43)              | 0.800   |
| Race (Non-Hispanic White),<br>n (%)                                  | 2634(78.13)                 | 1317(78.63)             | 1317(77.61)              | 0.460   |
| Education, n (%)                                                     |                             |                         |                          | 0.760   |
| Grades 0–12                                                          | 1379(17.54)                 | 682(17.24)              | 697(17.85)               |         |
| High school graduate/GED                                             | 1217(26.31)                 | 621(25.95)              | 596(26.69)               |         |
| Some college or above                                                | 2268(56.14)                 | 1129(56.80)             | 1139(55.46)              |         |
| Smoking <sup>†</sup> , n (%)                                         | 904(18.71)                  | 462(19.46)              | 442(17.93)               | 0.715   |
| Alcohol consumption, n (%)                                           | 952(22.76)                  | 493(22.89)              | 459(22.63)               | 0.902   |
| BMI, kg/m <sup>2</sup> , mean (SE)                                   | 30.64(0.17)                 | 30.41(0.23)             | 30.89(0.22)              | 0.113   |
| Weight status ( $\geq 25$ kg/m <sup>2</sup> ), n<br>(%) <sup>‡</sup> | 4013(82.25)                 | 2029(82.53)             | 1984(81.948)             | 0.715   |
| Sedentary time, hours/day,<br>mean (SE)                              | 390.48(4.72)                | 386.03(6.16)            | 395.13(5.96)             | 0.236   |
| Mean arterial pressure,<br>mmHg, mean (SE)                           | 89.92(0.29)                 | 90.25(0.40)             | 89.59(0.35)              | 0.194   |
| Total water intake, g, mean<br>(SE)                                  | 1058.14(24.20)              | 1047.33(32.08)          | 1069.41(30.63)           | 0.582   |
| HbA1c, %, mean (SE)                                                  | 5.89(0.02)                  | 5.89(0.03)              | 5.89(0.03)               | 0.917   |
| Triglycerides, mmol/L, mean<br>(SE)                                  | 1.96(0.03)                  | 1.95(0.03)              | 1.97(0.04)               | 0.716   |
| Albumin-adjusted calcium,<br>mmol/L, mean (SE)                       | 2.30(0.00)                  | 2.30(0.00)              | 2.30(0.00)               | 0.939   |
| eGFR, mL/min, mean (SE)                                              | 81.68(0.45)                 | 82.11(0.63)             | 81.23(0.61)              | 0.306   |
| Gout, n (%)                                                          | 169(2.83)                   | 75(2.44)                | 94(3.23)                 | 0.216   |
| CVD, n (%)                                                           |                             |                         |                          |         |
| Congestive heart failure                                             | 365(5.64)                   | 149(4.45)               | 216(6.88)                | 0.006   |
| Coronary heart disease                                               | 435(7.39)                   | 184(6.44)               | 251(8.39)                | 0.051   |
| Myocardial infarction                                                | 430(6.67)                   | 176(5.57)               | 254(7.82)                | 0.016   |
| Stroke                                                               | 380(6.52)                   | 184(6.57)               | 196(6.47)                | 0.910   |
| Thiazide user, n (%)                                                 | 983(17.98)                  | 491(18.20)              | 492(17.75)               | 0.776   |
| Loop diuretics user, n (%)                                           | 436(7.13)                   | 186(5.97)               | 250(8.35)                | 0.016   |
| H2RAs user, n (%)                                                    | 168(3.11)                   | 75(3.10)                | 93(3.12)                 | 0.979   |
| Kidney stones, n (%)                                                 | 658(13.51)                  | 286(11.23)              | 372(15.88)               | 0.002   |

Abbreviations: PPIs, proton pump inhibitors; PSM, propensity score matching; NHANES, National Health and Nutrition Examination Survey; SE, standard error; GED, General Equivalency Diploma; BMI, body mass index; eGFR, effective glomerular filtration rate; CVD, cardiovascular disease; H2RAs, H2-receptor antagonist.

\*Means and percentages were adjusted for survey weights of NHANES.

<sup>†</sup>Smoking was defined as smoking at least 100 cigarettes during their lifetime.

<sup>‡</sup>BMI was calculated by dividing weight in kilograms (kg) by height in meters squared (m<sup>2</sup>). Participants were classified as normal weight (BMI < 25 kg/m<sup>2</sup>), and overweight/obese (BMI  $\geq$  25 kg/m<sup>2</sup>).

**STROBE 2007 (v4) Statement—Checklist of items that should be included in reports of *cross-sectional studies***

| Section/Topic                | Item # | Recommendation                                                                                                                                                                       | Reported on page # |
|------------------------------|--------|--------------------------------------------------------------------------------------------------------------------------------------------------------------------------------------|--------------------|
| <b>Title and abstract</b>    | 1      | (a) Indicate the study's design with a commonly used term in the title or the abstract                                                                                               | 1                  |
|                              |        | (b) Provide in the abstract an informative and balanced summary of what was done and what was found                                                                                  | 1-2                |
| <b>Introduction</b>          |        |                                                                                                                                                                                      |                    |
| Background/rationale         | 2      | Explain the scientific background and rationale for the investigation being reported                                                                                                 | 2-3                |
| Objectives                   | 3      | State specific objectives, including any prespecified hypotheses                                                                                                                     | 3                  |
| <b>Methods</b>               |        |                                                                                                                                                                                      |                    |
| Study design                 | 4      | Present key elements of study design early in the paper                                                                                                                              | 3                  |
| Setting                      | 5      | Describe the setting, locations, and relevant dates, including periods of recruitment, exposure, follow-up, and data collection                                                      | 3-4                |
| Participants                 | 6      | (a) Give the eligibility criteria, and the sources and methods of selection of participants                                                                                          | 3-4                |
| Variables                    | 7      | Clearly define all outcomes, exposures, predictors, potential confounders, and effect modifiers. Give diagnostic criteria, if applicable                                             | 3-4                |
| Data sources/<br>measurement | 8*     | For each variable of interest, give sources of data and details of methods of assessment (measurement). Describe comparability of assessment methods if there is more than one group | 3-4                |
| Bias                         | 9      | <i>Describe any efforts to address potential sources of bias</i>                                                                                                                     | 3-4                |
| Study size                   | 10     | Explain how the study size was arrived at                                                                                                                                            | 3                  |
| Quantitative variables       | 11     | Explain how quantitative variables were handled in the analyses. If applicable, describe which groupings were chosen and why                                                         | 3-4                |
| Statistical methods          | 12     | (a) Describe all statistical methods, including those used to control for confounding                                                                                                | 4-5                |
|                              |        | (b) Describe any methods used to examine subgroups and interactions                                                                                                                  | 4-5                |
|                              |        | (c) Explain how missing data were addressed                                                                                                                                          | 4-5                |
|                              |        | (d) If applicable, describe analytical methods taking account of sampling strategy                                                                                                   | 4-5                |
|                              |        | (e) Describe any sensitivity analyses                                                                                                                                                | 4-5                |
| <b>Results</b>               |        |                                                                                                                                                                                      |                    |



|                          |     |                                                                                                                                                                                                              |      |
|--------------------------|-----|--------------------------------------------------------------------------------------------------------------------------------------------------------------------------------------------------------------|------|
| Participants             | 13* | (a) Report numbers of individuals at each stage of study—eg numbers potentially eligible, examined for eligibility, confirmed eligible, included in the study, completing follow-up, and analysed            | 5    |
|                          |     | (b) Give reasons for non-participation at each stage                                                                                                                                                         | 3, 5 |
|                          |     | (c) Consider use of a flow diagram                                                                                                                                                                           | 5    |
| Descriptive data         | 14* | (a) Give characteristics of study participants (eg demographic, clinical, social) and information on exposures and potential confounders                                                                     | 5    |
|                          |     | (b) Indicate number of participants with missing data for each variable of interest                                                                                                                          | 5    |
| Outcome data             | 15* | Report numbers of outcome events or summary measures                                                                                                                                                         | 5-6  |
| Main results             | 16  | (a) Give unadjusted estimates and, if applicable, confounder-adjusted estimates and their precision (eg, 95% confidence interval). Make clear which confounders were adjusted for and why they were included | 5-6  |
|                          |     | (b) Report category boundaries when continuous variables were categorized                                                                                                                                    | 5-6  |
|                          |     | (c) If relevant, consider translating estimates of relative risk into absolute risk for a meaningful time period                                                                                             | 5-6  |
| Other analyses           | 17  | Report other analyses done—eg analyses of subgroups and interactions, and sensitivity analyses                                                                                                               | 6    |
| <b>Discussion</b>        |     |                                                                                                                                                                                                              |      |
| Key results              | 18  | Summarise key results with reference to study objectives                                                                                                                                                     | 7    |
| Limitations              | 19  | Discuss limitations of the study, taking into account sources of potential bias or imprecision. Discuss both direction and magnitude of any potential bias                                                   | 8-9  |
| Interpretation           | 20  | Give a cautious overall interpretation of results considering objectives, limitations, multiplicity of analyses, results from similar studies, and other relevant evidence                                   | 7-9  |
| Generalisability         | 21  | Discuss the generalisability (external validity) of the study results                                                                                                                                        | 7-8  |
| <b>Other information</b> |     |                                                                                                                                                                                                              |      |
| Funding                  | 22  | Give the source of funding and the role of the funders for the present study and, if applicable, for the original study on which the present article is based                                                | 9    |

\*Give information separately for cases and controls in case-control studies and, if applicable, for exposed and unexposed groups in cohort and cross-sectional studies.

**Note:** An Explanation and Elaboration article discusses each checklist item and gives methodological background and published examples of transparent reporting. The STROBE checklist is best used in conjunction with this article (freely available on the Web sites of PLoS Medicine at <http://www.plosmedicine.org/>, Annals of Internal Medicine at <http://www.annals.org/>, and Epidemiology at <http://www.epidem.com/>). Information on the STROBE Initiative is available at [www.strobe-statement.org](http://www.strobe-statement.org).

# BMJ Open

## Association of Proton Pump Inhibitor Use with the risk of kidney stones in NHANES population: A cross-sectional study

|                                 |                                                                                                                                                                                                                                                                                                                                                   |
|---------------------------------|---------------------------------------------------------------------------------------------------------------------------------------------------------------------------------------------------------------------------------------------------------------------------------------------------------------------------------------------------|
| Journal:                        | <i>BMJ Open</i>                                                                                                                                                                                                                                                                                                                                   |
| Manuscript ID                   | bmjopen-2023-075136.R1                                                                                                                                                                                                                                                                                                                            |
| Article Type:                   | Original research                                                                                                                                                                                                                                                                                                                                 |
| Date Submitted by the Author:   | 24-Aug-2023                                                                                                                                                                                                                                                                                                                                       |
| Complete List of Authors:       | liu, wen; Chinese Academy of Medical Sciences & Peking Union Medical College,<br>Wang, Jia; The Affiliated Hospital of Qingdao University, Department of Gastroenterology<br>Wang, Miao; Beijing Hospital, Department of Urology<br>Wang, Miaomiao; Beijing Hospital, Department of Urology<br>Liu, Ming; Beijing Hospital, Department of Urology |
| <b>Primary Subject Heading</b>: | Urology                                                                                                                                                                                                                                                                                                                                           |
| Secondary Subject Heading:      | Gastroenterology and hepatology, Public health                                                                                                                                                                                                                                                                                                    |
| Keywords:                       | Risk Factors, Urolithiasis < UROLOGY, Adverse events < THERAPEUTICS                                                                                                                                                                                                                                                                               |
|                                 |                                                                                                                                                                                                                                                                                                                                                   |

SCHOLARONE™  
Manuscripts

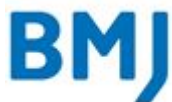

I, the Submitting Author has the right to grant and does grant on behalf of all authors of the Work (as defined in the below author licence), an exclusive licence and/or a non-exclusive licence for contributions from authors who are: i) UK Crown employees; ii) where BMJ has agreed a CC-BY licence shall apply, and/or iii) in accordance with the terms applicable for US Federal Government officers or employees acting as part of their official duties; on a worldwide, perpetual, irrevocable, royalty-free basis to BMJ Publishing Group Ltd ("BMJ") its licensees and where the relevant Journal is co-owned by BMJ to the co-owners of the Journal, to publish the Work in this journal and any other BMJ products and to exploit all rights, as set out in our [licence](#).

The Submitting Author accepts and understands that any supply made under these terms is made by BMJ to the Submitting Author unless you are acting as an employee on behalf of your employer or a postgraduate student of an affiliated institution which is paying any applicable article publishing charge ("APC") for Open Access articles. Where the Submitting Author wishes to make the Work available on an Open Access basis (and intends to pay the relevant APC), the terms of reuse of such Open Access shall be governed by a Creative Commons licence – details of these licences and which [Creative Commons](#) licence will apply to this Work are set out in our licence referred to above.

Other than as permitted in any relevant BMJ Author's Self Archiving Policies, I confirm this Work has not been accepted for publication elsewhere, is not being considered for publication elsewhere and does not duplicate material already published. I confirm all authors consent to publication of this Work and authorise the granting of this licence.

1  
2  
3  
4 1 **Association of Proton Pump Inhibitor Use with the risk of kidney stones in**  
5  
6 2 **NHANES population: A cross-sectional study**

7 3 **Wen Liu<sup>1,2†</sup>, Jia Wang<sup>3†</sup>, Miao Wang<sup>1</sup>, Miaomiao Wang<sup>1,2</sup>, and Ming Liu<sup>1,2\*</sup>**

9 4 1 Department of Urology, Beijing Hospital, National Center of Gerontology, Institute of Geriatric  
11 5 Medicine, Chinese Academy of Medical Sciences, Beijing, China.

13 6 2 Graduate School of Peking Union Medical College, Chinese Academy of Medical Sciences, Beijing,  
15 7 China.

17 8 3 Department of Gastroenterology, The Affiliated Hospital of Qingdao University, Qingdao, Shandong,  
19 9 China.

21 10 † Both authors contributed equally to this work

23 11 \* Correspondence: Ming Liu, Department of Urology, Beijing Hospital, National Center of  
25 12 Gerontology, Institute of Geriatric Medicine, Chinese Academy of Medical Sciences, No.1 DaHua  
27 13 Road, Dong Dan, Beijing, 100730, China.

29 14 E-mail: liumingbjh@126.com

31 15  
32 16 **Abstract**

34 17 **Objective** Several studies have suggested a potential link between proton pump inhibitors (PPIs)  
36 18 use and the risk of kidney stones, attributed to alterations in urine mineral levels. Our study aimed  
38 19 to investigate the association between PPI use and kidney stones in US adults.

40 20 **Design** Cross-sectional study.

42 21 **Setting** National Health and Nutrition Examination Survey (NHANES) (2007–2018).

44 22 **Participants** A total of 27,075 individuals with complete information for PPI use and history of  
46 23 kidney stones were included in this study.

48 24 **Outcomes and analyses** Nonlinear analysis, logistic regression analysis, and subgroup analysis  
50 25 were conducted to estimate the relationship between PPI use and the occurrence and recurrence of  
52 26 kidney stones, after adjusting for potential confounding factors.

54 27 **Results** Multivariable logistic regression analysis revealed a significant association between PPI  
56 28 use and kidney stones (odds ratio [OR] 1.31, 95%CI 1.07–1.60), with a 4% increase in the  
58 29 prevalence of kidney stones for each additional year of PPI use ( $P < 0.001$ ). Similarly, PPI use was  
60 30 significantly associated with recurrent kidney stones (OR 1.49, 95%CI 1.04–2.13), with a 7%

1  
2  
3  
4 31 increase in the recurrence of kidney stones for each additional year of PPI use ( $P < 0.001$ ).  
5  
6 32 Furthermore, these associations remained significant even after conducting propensity score  
7  
8 33 matching analysis on a subset of PPI users and non-users (all  $P \leq 0.001$ ). Subgroup analyses showed  
9  
10 34 that the effects of PPI use on kidney stones differed by age, sex, race, and BMI.

11 35 **Conclusions** This study indicated that long-term use of PPI was associated with a higher risk of  
12  
13 36 both the presence and recurrence of kidney stones.

14  
15 37 **Keywords:** NHANES; urolithiasis; proton pump inhibitors; risk factors; drug effects  
16  
17 38

### 19 39 **STRENGTHS AND LIMITATIONS OF THIS STUDY**

20  
21 40 The NHANES dataset comprises a representative sample of the national population to ensure that  
22  
23 41 our findings can be extrapolated to the broader population.

24  
25 42 This study explores the positive relationship between PPI use and recurrent kidney stones in  
26  
27 43 patients with history of nephrolithiasis.

28  
29 44 Multiple potential confounders were adjusted and PSM design was performed to ensure the  
30  
31 45 reliability of the results.

32  
33 46 It is difficult to draw causal conclusions from such cross-sectional analyses.

34  
35 47 NHANES may did not record information regarding the time and type of kidney stones and the  
36  
37 48 dosage and type of PPI use.

### 40 49 41 50 **Introduction**

42  
43 51 Kidney stone is a common disease in US, with a high prevalence of 12% of men and 10% of  
44  
45 52 women, and caused high cost and morbidity(1, 2). Some drugs may affect the risk of kidney  
46  
47 53 stones by altering active compounds crystallizing in urine or substances impairing urine  
48  
49 54 composition(3-5).

50  
51 55 Proton pump inhibitors (PPIs) are commonly prescribed medications worldwide for the  
52  
53 56 treatment of gastric acid-related diseases such as gastroesophageal reflux disease (GERD), H.  
54  
55 57 pylori infection, and gastric ulcers(6). However, the escalating prevalence of PPI overuse,  
56  
57 58 especially for long-term therapy, has become a concerning issue(6, 7). Long-term PPI intake is  
58  
59 59 associated with a reduction in intestinal absorption of essential vitamins and minerals and  
60  
60 60 increased susceptibility to infections, chronic kidney disease, and dementia(7). Given that PPI can

1  
2  
3  
4 61 inhibit gastric acid secretion, thereby affecting the intestinal absorption of essential minerals and  
5  
6 62 altering the levels of calcium, magnesium, and citrate(8, 9), several studies have investigated the  
7  
8 63 impact of PPI use on the risk of kidney stones(10-12). For instance, Sui et al. found that PPI use  
9  
10 64 might elevate the risk of kidney stones by lowering the levels of urinary citrate and magnesium,  
11  
12 65 which could compromise their inhibitory effect on kidney stone formation(11). However, it should  
13  
14 66 be noted that all participants in their study were GERD patients. Similarly, Simonov et al.  
15  
16 67 identified a correlation between PPI use and kidney stones primarily based on a sample of young  
17  
18 68 individuals and males(10), thereby limiting the generalizability of their findings to not only the  
19  
20 69 general population but also specific patient groups, such as recurrent stone formers(13).

21 70 This study aimed to investigate the potential association between PPI use and kidney stones  
22  
23 71 by analyzing National Health and Nutrition Examination Survey (NHANES) data from 2007 to  
24  
25 72 2018. Our hypothesis was that PPI use increases the risk of both kidney stone formation and  
26  
27 73 recurrence.

## 28 29 74 **Methods**

### 30 31 75 **Study Population and Design**

32  
33 76 The NHANES is an ongoing cross-sectional survey that employs a sophisticated multistage  
34  
35 77 sample methodology to investigate the health and nutritional status of the non-institutionalized  
36  
37 78 population in US. Demographic characteristics, clinical history, and self-reported dietary were  
38  
39 79 collected from participants using a structured household interview. Physical examinations,  
40  
41 80 including anthropometric measurements and blood samples, were collected within a mobile  
42  
43 81 examination center. The protocol was approved by the National Center for Health Statistics (NCHS)  
44  
45 82 Ethics Review Board, and informed consent was obtained from all participants. Additional  
46  
47 83 information regarding data collection can be accessed on the NHANES website(14).

48  
49 84 Six NHANES cycles were used in the study from 2007 to 2018. Initially, 34,709 participants  
50  
51 85 aged 20 years and older were included. However, some participants were excluded: 372 participants  
52  
53 86 who were pregnant, 90 participants with incomplete kidney stone questionnaire, and 7,026  
54  
55 87 participants with incomplete variables. In addition, given the limited number of participants who  
56  
57 88 had taken PPI for more than 15 years, the standard errors for model estimates increased  
58  
59 89 substantially(15), thus 146 participants were excluded. Finally, 27,075 participants were included  
60  
90 90 in the analysis, consisting of 13,711 females and 13,364 males. Fig. 1 illustrates the filtering process

1  
2  
3  
4 91 used in this study.

5 92 **Assessment of Outcomes**

6  
7 93 The primary outcome was the response to the question, “Have you ever had kidney stones?”  
8  
9 94 (NHANES 2007–2018). Participants who responded “yes” were defined as kidney stone formers.  
10  
11 95 The secondary outcome was the response to the question, “How many times have you passed a  
12  
13 96 kidney stone?” (NHANES 2007–2014). Participants who reported passing at least two stones were  
14  
15 97 classified as recurrent stone formers.

16  
17 98 **Medication Use**

18  
19 99 The independent variables in this study were whether participants had taken PPI and the  
20  
21 100 duration of their PPI use. Information on the types and duration of acid suppressant medication was  
22  
23 101 obtained through prescription medication questionnaires. The types of PPI in this study included  
24  
25 102 omeprazole, esomeprazole, lansoprazole, pantoprazole, and rabeprazole. For participants using PPI,  
26  
27 103 the duration of use was equal to the years since initiating therapy. Participants who did not use PPI  
28  
29 104 had a duration of use recorded as zero. Data on specific dosages or previously discontinued  
30  
31 105 prescription medications were unavailable.

32  
33 106 **Ascertainment of Covariates**

34  
35 107 The study collected three types of detailed information about covariates through standardized  
36  
37 108 personal interviews. The first group included demographic factors including age, sex, race,  
38  
39 109 education level, smoking status, and alcohol consumption. The second group consisted of factors  
40  
41 110 that impact the body's metabolism level, including body mass index (BMI), mean arterial pressure,  
42  
43 111 HbA1c, triglyceride levels, history of cardiovascular disease (CVD), thiazide use, loop diuretic use,  
44  
45 112 and histamine-2 receptor antagonists (H2RA) use. The third group focused on risk factors related to  
46  
47 113 kidney stone formation, including sedentary time, total water intake, albumin-adjusted calcium  
48  
49 114 levels, estimated glomerular filtration rate (eGFR), and history of gout. Education level was  
50  
51 115 categorized as follows: Grades 0–12, high school graduate/General Equivalency Diploma, and some  
52  
53 116 college or above. Smokers was defined as smoking at least 100 cigarettes during their lifetime. BMI  
54  
55 117 was calculated by dividing weight in kilograms (kg) by height in meters squared (m<sup>2</sup>). History of  
56  
57 118 CVD (including congestive heart failure, coronary heart disease, myocardial infarction, and stroke)  
58  
59 119 was defined if participants self-reported a history of these conditions. The Chronic Kidney Disease  
60  
120 Epidemiology Collaboration (CKD-EPI) equation was used to calculate eGFR(16). The CKD-EPI

1  
2  
3  
4 121 equation is as follows:  $eGFR = 141 \times \min(\text{Scr}/\kappa, 1)^\alpha \times \max(\text{Scr}/\kappa, 1)^{-1.209} \times 0.993^{\text{Age}} \times 1.018$  [if  
5 122 female]  $1.159$  [if black], where Scr is serum creatinine,  $\kappa$  is 0.7 for females and 0.9 for males,  $\alpha$  is  
6 123  $-0.329$  for females and  $-0.411$  for males, min indicates the minimum of Scr/ $\kappa$  or 1, and max  
7 124 indicates the maximum of Scr/ $\kappa$  or 1. Gout was defined as a self-reported diagnosis of gout, and/or  
8 125 the use of anti-gout medication.

## 126 **Statistical Analyses**

127 All statistical analyses considered NHANES survey design characteristics with sampling  
128 weights. Descriptive statistics were used to evaluate the demographic and clinic characteristics of  
129 the study population. The variance inflation factor (VIF) was utilized to evaluate multicollinearity  
130 among covariates and between covariates and kidney stones. A VIF value over 10 indicates  
131 multicollinearity, but none was observed in this study (Supplementary Table 1) (17). To explore the  
132 relationship between PPI use and kidney stones, we performed four weighted logistic regression  
133 models and controlled for the aforementioned explanatory variables by modeling PPI as continuous  
134 variables based on the time of use. To evaluate the potential non-linear relationship between the  
135 time of PPI use and kidney stones, restricted cubic splines were used with three knots at the 5th,  
136 50th, and 95th centiles. Subgroup analyses were also performed to explore whether the relationship  
137 between the time of PPI use and kidney stones differed by age, sex, race, and BMI, and potential  
138 effect modifiers were tested using the Wald test for multiplicative interactions. Additionally, a 1:1  
139 propensity score matching (PSM) analysis was performed to balance population differences  
140 between PPI users and non-users while adjusting for all confounding variables. Previous studies  
141 have established links between kidney stones and dietary factors, such as vitamin C intake, caffeine  
142 consumption, and the dietary inflammatory index (DII)(18-20). To address potential confounding  
143 effects, a sensitivity analysis was conducted using model 3 as the baseline, with additional  
144 adjustments made for three variables: vitamin C intake, caffeine intake, and DII. We conducted a  
145 meta-analysis using the 'meta' package, which allowed us to combine data from relevant studies and  
146 estimate an overall effect size for the association between PPI use and kidney stones. All statistical  
147 tests were two-sided, and P-values  $< 0.05$  (two-sided) were considered statistically significant. R  
148 4.2.2 software was used for modeling.

## 149 **Results**

### 150 **Population Characteristics**



1  
2  
3  
4 151 This study included 27,075 participants aged 20 years and older from the NHANES database  
5  
6 152 (2007–2018), representing 203,076,872 adults. And table 1 presents their demographic and clinic  
7  
8 153 characteristics based on PPI use. The mean age of all participants was  $47.46 \pm 0.26$  (standard  
9  
10 154 error) years, with roughly equal representation of females (51.13%) and males (48.87%). PPI  
11  
12 155 users were more likely to be older, females, non-Hispanic white, obese, have lower education  
13  
14 156 level, alcohol consumption, total water intake, eGFR, higher sedentary time, mean arterial  
15  
16 157 pressure, HbA1c, triglycerides, albumin-adjusted calcium. PPI users were taking more thiazide,  
17  
18 158 loop diuretics, and H2RAs medications compared to non-users. Furthermore, CVD, gout and  
19  
20 159 kidney stone diseases were more common in PPI users (all  $P < 0.05$ ).

### 21 160 **Multivariable Logistic Regression Analyses**

22  
23 161 Weighted univariable and multivariable logistic regression models were used to investigate the  
24  
25 162 independent association between PPI use and the risk of kidney stones, with PPI non-user as the  
26  
27 163 reference group (Table 2). In the crude model, PPI use showed a significantly positive association  
28  
29 164 with the prevalence of kidney stones ( $OR = 1.86$ ,  $95\%CI = 1.55–2.22$ ). In the fully adjusted model  
30  
31 165 (model 3), the association between PPI use and the prevalence of kidney stones remained significant  
32  
33 166 ( $OR = 1.31$ ,  $95\%CI = 1.07–1.60$ ). When considering PPI use as a continuous variable, the restricted  
34  
35 167 cubic spline analyses indicated a linear relationship between the duration of PPI use and the  
36  
37 168 prevalence of kidney stones ( $P$  for non-linearity = 0.651) (Fig. 2A). With each additional year of  
38  
39 169 PPI use, the prevalence of kidney stones increased by 4% (Table 2). Additionally, we explored the  
40  
41 170 association between PPI use and recurrent kidney stones. In the crude model, PPI use showed a  
42  
43 171 significantly positive association with the recurrence of kidney stones ( $OR = 1.49$ ,  $95\%CI = 1.05–$   
44  
45 172  $2.09$ ). This positive association persisted in the fully adjusted model (model 3) ( $OR = 1.49$ ,  $95\%CI$   
46  
47 173  $= 1.04–2.13$ ). The duration of PPI use exhibited a linear correlation with the recurrence of kidney  
48  
49 174 stones ( $P$  for non-linearity = 0.484) (Fig. 2B), with a 7% increase for each additional year of PPI  
50  
51 175 use (Table 2).

### 52 176 **Subgroup Analyses**

53  
54 177 Moreover, subgroup analyses were performed to assess whether the relationship between the  
55  
56 178 duration of PPI use and kidney stones were influenced by age, sex, race, and BMI (Table 3). After  
57  
58 179 adjusting for all covariates, it was found that the duration of PPI use was significantly associated  
59  
60 180 with the prevalence of kidney stones in participants aged 50 years or order, females, non-Hispanic

1  
2  
3  
4 181 White, and those with a BMI of 25 kg/m<sup>2</sup> or higher. On the other hand, a significant positive  
5  
6 182 association between time of PPI use and recurrent kidney stones was observed only in participants  
7  
8 183 non-Hispanic White, and those with a BMI of 25 kg/m<sup>2</sup> or higher (all *P* for interaction > 0.05).

#### 9 184 **Sensitivity analyses and Meta-analysis**

10  
11 185 A 1:1 matched cohort analysis was conducted through PSM to minimize potential bias, given  
12  
13 186 the significant difference in PPI use and non-use group (Table 1). This approach confirmed 4864  
14  
15 187 participants in the matched cohort. The descriptive statistics results showed that no significant  
16  
17 188 differences observed in most variables between the PPI non-user and PPI user groups  
18  
19 189 (Supplementary Table 2). In the fully adjusted model, the dose–response curve still displayed a  
20  
21 190 positive association between the duration of PPI use and kidney stones (*OR* = 1.05, 95%*CI* = 1.02–  
22  
23 191 1.08, *P* for non-linearity = 0.956) (Supplementary Fig. 1A) and recurrent kidney stones (*OR* = 1.10,  
24  
25 192 95%*CI* = 1.02–1.18, *P* for non-linearity = 0.488) (Supplementary Fig. 1B). Moreover, the results  
26  
27 193 remained significant after making additional adjustments for vitamin C intake, caffeine  
28  
29 194 consumption, and DII (Supplementary Table 3). Furthermore, we performed a meta-analysis based  
30  
31 195 on our findings and previously published research, confirming a positive association between the  
32  
33 196 PPI use and the risk of kidney stones (*OR* = 1.49, 95%*CI* = 1.05–2.10) (Supplementary Fig. 2)(10–  
34  
35 197 12).

#### 36 198 **Discussion**

37  
38  
39 199 In this large cross-sectional study based on NHANES data from 2007 to 2018, we found that  
40  
41 200 PPI use was associated with an increased risk of kidney stones. The duration of PPI use  
42  
43 201 demonstrated a dose-response association with kidney stones. Furthermore, our study uncovered a  
44  
45 202 novel association between long-term PPI use and recurrent kidney stones in patients with a history  
46  
47 203 of kidney stones, demonstrating a significant linear correlation. Additionally, subgroup analysis  
48  
49 204 found that the effects of age, sex, race, and BMI varied in their influence on the relationship between  
50  
51 205 PPI use and the prevalence of kidney stones.

52  
53 206 Several studies have shown that PPI use could increase the risk of kidney stones, with a dose-  
54  
55 207 response relationship(10-12). A retrospective study conducted on the Women's Veterans Cohort,  
56  
57 208 which included 465,891 individuals, revealed that PPI use was linked to a 1.25-fold higher risk of  
58  
59 209 kidney stones (95% *CI* = 1.19–1.33)(10). It should be noted that this study included mainly young  
60  
210 individuals (with a median age of 32 years) and was predominantly males (86%), thus having a

1  
2  
3  
4 211 certain degree of selection bias(13). Another study by Sui et al. also found a positive association  
5  
6 212 between PPI use and kidney stones in patients with GERD, with a 1.46-fold increased risk (95%CI  
7  
8 213 = 1.38–1.55), which could help in assessing the potential risk of kidney stones associated with PPI  
9  
10 214 exposure(11). Nevertheless, both studies were limited to specific populations, limiting the  
11  
12 215 generalizability of their findings to the general population. In contrast, a nationwide population  
13  
14 216 cohort from Korea, without selection bias, also showed a positive association between PPI use and  
15  
16 217 kidney stones, displaying a dose-response relationship(12). Similarly, the current study, based on  
17  
18 218 data from the NHANES database representing over 203 million individuals, found that PPI use was  
19  
20 219 significantly associated with not only a higher risk of kidney stones, but also recurrent kidney stones.  
21  
22 220 The findings from the meta-analysis conducted in this study have confirmed the positive association  
23  
24 221 between PPI use and the risk of kidney stones. Furthermore, the risk of developing kidney stones  
25  
26 222 was found to be higher in individuals who used PPI for a longer duration, highlighting the  
27  
28 223 importance of monitoring this potential side effects of long-term PPI treatment, especially for  
29  
30 224 patients with a history of kidney stones.

31 225 The mechanisms underlying the impact of PPI on kidney stone formation remain unclear.  
32  
33 226 Studies have suggested that PPI can elevate gastric pH, leading to a decrease in magnesium  
34  
35 227 absorption and urinary magnesium levels(9). Magnesium has been known to inhibit the formation  
36  
37 228 of calcium oxalate crystals in urine(21, 22). A meta-analysis of nine observational studies found a  
38  
39 229 significant increased risk of hypomagnesemia among patients using PPI(23). It should be noted that  
40  
41 230 magnesium absorption occurs through both active and passive mechanisms, and alterations in pH  
42  
43 231 do not affect passive absorption(23). Therefore, PPI use does not always result in hypomagnesemia,  
44  
45 232 but patients with impaired gastrointestinal absorptive capacity may have an increased risk of  
46  
47 233 developing hypomagnesemia. On the other hand, research has shown that citrate can inhibit the  
48  
49 234 crystallization of calcium salts in urine, and a deficiency of citrate can increase the risk of stone  
50  
51 235 formation(24, 25). A study of 301 nephrolithiasis patients with 24-hour urine data found that PPI  
52  
53 236 exposure significantly reduced urinary citrate excretion, but did not affect urinary magnesium, pH,  
54  
55 237 or other urinary minerals(8). Similarly, another study on GERD patients reported a significant  
56  
57 238 correlation between PPI use and lower levels of urinary citrate and magnesium(11). Therefore, given  
58  
59 239 the association between PPI use and hypomagnesuria and hypocitraturia, it may monitor the levels  
60  
240 of urinary magnesium and citrate when using PPI.

1  
2  
3  
4 241 PPIs are commonly prescribed for acid-related disorders, and patients with these conditions  
5  
6 242 may be at higher risk for kidney stone formation(26). In this study, we employed the PSM analysis  
7  
8 243 to minimize potential differences between PPI users and non-users, yet still identified a significant  
9  
10 244 association between PPI use and the occurrence and recurrence of kidney stones. Subgroup analyses  
11  
12 245 further revealed that certain patient groups, including the elderly, females, non-Hispanic Whites,  
13  
14 246 and those with a BMI of 25 kg/m<sup>2</sup> or higher, exhibited a stronger positive association between PPI  
15  
16 247 use and the prevalence of kidney stones, highlighting the importance of considering potential side  
17  
18 248 effects of PPI use in these populations. While it is undeniable that PPI therapy has improved the  
19  
20 249 quality of life for many patients with acid-related disorders(27), a growing body of literature  
21  
22 250 suggested a relationship between long-term PPI use and adverse events(28). Caution should be  
23  
24 251 exercised when discontinuing PPI use for evidence-based indications(29), but global concerns over  
25  
26 252 long-term PPI overuse should not be overlooked(6, 7), especially in individuals with a history of  
27  
28 253 kidney stones and high-risk factors, such as the elderly, females, non-Hispanic Whites, and those  
29  
30 254 with a BMI of 25 kg/m<sup>2</sup> or higher, in order to reduce unnecessary use.

31 255 This study has several strengths. Firstly, the NHANES dataset comprises a representative  
32  
33 256 sample of the national population, and we utilize NHANES-provided weights to ensure that our  
34  
35 257 findings can be extrapolated to the broader population. Secondly, this study not only elucidates the  
36  
37 258 correlation between PPI use and the prevalence of kidney stones but also probes its association with  
38  
39 259 the recurrence of renal calculi in individuals with a history of nephrolithiasis.. Furthermore, multiple  
40  
41 260 potential confounders were adjusted and PSM design was performed to ensure the reliability of the  
42  
43 261 results. However, this study also has several limitations. Firstly, it is difficult to draw causal  
44  
45 262 conclusions from such cross-sectional analyses. Although we adjusted for three types of detailed  
46  
47 263 covariate information, there may still be unmeasured potential factors that could affect the  
48  
49 264 association between PPI and nephrolithiasis. Secondly, the questionnaire survey may have been  
50  
51 265 prone to recall bias and reporting bias, which could affect the accuracy of the data collected. Thirdly,  
52  
53 266 NHANES lacks objective diagnostic imaging for the identification of kidney stones, potentially  
54  
55 267 resulting in the omission of asymptomatic cases. Additionally, the dataset does not provide details  
56  
57 268 on the timing and specific type of kidney stones. Finally, the lack of information about the dosage  
58  
59 269 and type of PPI use may limit the interpretability of the results.

60 270 **Conclusions**

1  
2  
3  
4 271 In conclusion, our study revealed a relationship between PPI use and the prevalence of kidney  
5  
6 272 stones, as well as an increased risk of recurrent kidney stones in patients with a history of  
7  
8 273 nephrolithiasis. To mitigate this potential adverse effect, caution should be exercised regarding  
9  
10 274 unnecessary long-term use of PPI.

11 275

#### 12 276 **Acknowledgments**

13  
14  
15 277 We appreciate the American Centers for Disease Control and Prevention for conducting the survey and  
16  
17 278 making it available online freely, and all the participants for providing these data.

#### 18 279 **Contributors**

19  
20  
21 280 W-L: conceptualization, methodology, data analysis, manuscript writing; J-W: methodology, data  
22  
23 281 collection, data analysis, manuscript writing; M-W: methodology, data collection, data analysis; MM-  
24  
25 282 W: data analysis, manuscript writing, supervision; M-L: conceptualization, supervision, manuscript  
26  
27 283 editing, funding acquisition.

#### 28 284 **Funding**

29  
30  
31 285 This work was supported by the National Key Research and Development Program of China  
32  
33 286 [2022YFC3602900] and National High Level Hospital Clinical Research Funding [BJ-2022-115].

#### 34 287 **Competing interests**

35  
36 288 None declared

#### 37 289 **Patient and public involvement**

38  
39 290 None.

#### 40 291 **Patient consent for publication**

41  
42 292 Not applicable.

#### 43 293 **Ethical statement**

44  
45  
46 294 Ethical review and approval for the research involving human participants were obtained from the  
47  
48 295 Ethics Review Board of the NCHS (Protocol #98-12). The current analysis, which is based on publicly  
49  
50 296 available data, did not necessitate any further ethics approval. Written informed consent was obtained  
51  
52 297 from all patients or participants who were part of the study.

#### 53 298 **Data availability statement**

54  
55  
56 299 Publicly available datasets were analyzed in this study. This data can be downloaded here:  
57  
58 300 <https://www.cdc.gov/nchs/nhanes/> (NHANES 2005-2006 and 2007-2008).

301

302 **References**

- 303 1. Saigal CS, Joyce G, Timilsina AR. Direct and indirect costs of nephrolithiasis in an employed  
304 population: opportunity for disease management? *Kidney Int.* 2005;68(4):1808-14.
- 305 2. Abufaraj M, Xu T, Cao C, Waldhoer T, Seitz C, D'Andrea D, et al. Prevalence and Trends in Kidney  
306 Stone Among Adults in the USA: Analyses of National Health and Nutrition Examination Survey 2007-  
307 2018 Data. *Eur Urol Focus.* 2021;7(6):1468-75.
- 308 3. Dauw CA, Yi Y, Bierlein MJ, Yan P, Alruwaily AF, Ghani KR, et al. Factors Associated With Preventive  
309 Pharmacological Therapy Adherence Among Patients With Kidney Stones. *Urology.* 2016;93:45-9.
- 310 4. Daudon M, Frochot V, Bazin D, Jungers P. Drug-Induced Kidney Stones and Crystalline  
311 Nephropathy: Pathophysiology, Prevention and Treatment. *Drugs.* 2018;78(2):163-201.
- 312 5. Cohen AJ, Adamsky MA, Nottingham CU, Pruitt J, Lapin B, Wang CH, et al. Impact of Statin Intake  
313 on Kidney Stone Formation. *Urology.* 2019;124:57-61.
- 314 6. Savarino V, Marabotto E, Zentilin P, Furnari M, Bodini G, De Maria C, et al. Proton pump inhibitors:  
315 use and misuse in the clinical setting. *Expert Rev Clin Pharmacol.* 2018;11(11):1123-34.
- 316 7. Eusebi LH, Rabitti S, Artesiani ML, Gelli D, Montagnani M, Zagari RM, et al. Proton pump inhibitors:  
317 Risks of long-term use. *J Gastroenterol Hepatol.* 2017;32(7):1295-302.
- 318 8. Patel PM, Kandabarow AM, Aiwerioghene E, Blanco-Martinez E, Hart S, Leehey DJ, et al. Proton-  
319 pump inhibitors associated with decreased urinary citrate excretion. *Int Urol Nephrol.* 2021;53(4):679-  
320 83.
- 321 9. Ito T, Jensen RT. Association of long-term proton pump inhibitor therapy with bone fractures and  
322 effects on absorption of calcium, vitamin B12, iron, and magnesium. *Curr Gastroenterol Rep.*  
323 2010;12(6):448-57.
- 324 10. Simonov M, Abel EA, Skanderson M, Masoud A, Hauser RG, Brandt CA, et al. Use of Proton Pump  
325 Inhibitors Increases Risk of Incident Kidney Stones. *Clin Gastroenterol Hepatol.* 2021;19(1):72-9.e21.
- 326 11. Sui W, Miller NL, Gould ER, Zhang KC, Koyama T, Hsi RS. Proton pump inhibitors use and risk of  
327 incident nephrolithiasis. *Urolithiasis.* 2022;50(4):401-9.
- 328 12. Kim SY, Yoo DM, Bang WJ, Choi HG. Association between Urolithiasis and History Proton Pump  
329 Inhibitor Medication: A Nested Case-Control Study. *J Clin Med.* 2022;11(19).
- 330 13. Pella E, Chalkidou M, Sarafidis P. Proton Pump Inhibitors, Histamine-2 Receptor Antagonists, and  
331 the Risk of Kidney Stones: Negligible or Not? *Clin Gastroenterol Hepatol.* 2021;19(3):624-5.
- 332 [dataset] 14. NHANES Questionnaires, Datasets, and Related Documentation. Available from:  
333 <https://wwwn.cdc.gov/nchs/nhanes/Default.aspx>: [Accessed April 14, 2023 pp.].
- 334 15. Chang SL, Harshman LC, Presti JC, Jr. Impact of common medications on serum total prostate-  
335 specific antigen levels: analysis of the National Health and Nutrition Examination Survey. *J Clin Oncol.*  
336 2010;28(25):3951-7.
- 337 16. Levey AS, Stevens LA, Schmid CH, Zhang YL, Castro AF, 3rd, Feldman HI, et al. A new equation to  
338 estimate glomerular filtration rate. *Ann Intern Med.* 2009;150(9):604-12.
- 339 17. Charidimou A, Martinez-Ramirez S, Reijmer YD, Oliveira-Filho J, Lauer A, Roongpiboonsopit D, et  
340 al. Total Magnetic Resonance Imaging Burden of Small Vessel Disease in Cerebral Amyloid Angiopathy:  
341 An Imaging-Pathologic Study of Concept Validation. *JAMA Neurol.* 2016;73(8):994-1001.
- 342 18. Ferraro PM, Curhan GC, Gambaro G, Taylor EN. Total, Dietary, and Supplemental Vitamin C Intake



- 1  
2  
3 343 and Risk of Incident Kidney Stones. *Am J Kidney Dis.* 2016;67(3):400-7.
- 4 344 19. Geng J, Qiu Y, Kang Z, Li Y, Li J, Liao R, et al. The association between caffeine intake and risk of  
5 345 kidney stones: A population-based study. *Front Nutr.* 2022;9:935820.
- 6 346 20. Liu N, Feng Y, Li J, Ma X, Ma F. Relationship between the dietary inflammatory index and kidney  
7 347 stone prevalence. *World J Urol.* 2022;40(6):1545-52.
- 8 348 21. Schwartz BF, Bruce J, Leslie S, Stoller ML. Rethinking the role of urinary magnesium in calcium  
9 349 urolithiasis. *J Endourol.* 2001;15(3):233-5.
- 10 350 22. Johansson G, Backman U, Danielson BG, Fellström B, Ljunghall S, Wikström B. Effects of  
11 351 magnesium hydroxide in renal stone disease. *J Am Coll Nutr.* 1982;1(2):179-85.
- 12 352 23. Cheungpasitporn W, Thongprayoon C, Kittanamongkolchai W, Srivali N, Edmonds PJ, Ungprasert  
13 353 P, et al. Proton pump inhibitors linked to hypomagnesemia: a systematic review and meta-analysis of  
14 354 observational studies. *Ren Fail.* 2015;37(7):1237-41.
- 15 355 24. Goldberg H, Grass L, Vogl R, Rapoport A, Oreopoulos DG. Urine citrate and renal stone disease.  
16 356 *Cmaj.* 1989;141(3):217-21.
- 17 357 25. Pak CY. Citrate and renal calculi: an update. *Miner Electrolyte Metab.* 1994;20(6):371-7.
- 18 358 26. Bapir R, Bhatti KH, Eliwa A, García-Perdomo HA, Gherabi N, Hennessey D, et al. Risk of urinary  
19 359 stone formation associated to proton pump inhibitors: A systematic review and metanalysis. *Arch Ital*  
20 360 *Urol Androl.* 2022;94(4):507-14.
- 21 361 27. Moayyedi P, Armstrong D, Hunt RH, Lei Y, Bukoski M, White RJ. The gain in quality-adjusted life  
22 362 months by switching to esomeprazole in those with continued reflux symptoms in primary care:  
23 363 EncompASS--a cluster-randomized trial. *Am J Gastroenterol.* 2010;105(11):2341-6.
- 24 364 28. Elias E, Targownik LE. The Clinician's Guide to Proton Pump Inhibitor Related Adverse Events.  
25 365 *Drugs.* 2019;79(7):715-31.
- 26 366 29. Boghossian TA, Rashid FJ, Thompson W, Welch V, Moayyedi P, Rojas-Fernandez C, et al.  
27 367 Deprescribing versus continuation of chronic proton pump inhibitor use in adults. *Cochrane Database*  
28 368 *Syst Rev.* 2017;3(3):Cd011969.

29 369  
30  
31  
32  
33  
34  
35  
36  
37  
38  
39 370 **Fig. 1** Study flowchart. Of 59,842 participants in the 2007–2018 National Health and Nutrition  
40 371 Examination Survey (NHANES), 27,075 remained after fulfilling inclusion and exclusion criteria.

41 372 **Fig. 2** Dose-response relationships between time of PPIs use and kidney stones. (A) Time of PPIs  
42 373 use and kidney stones; (B) Time of PPIs use and recurrent kidney stones.

43 374 Abbreviations: OR, odds ratio; PPIs, proton pump inhibitors. Adjusted for age, sex, race, education  
44 375 level, smoking, alcohol consumption, BMI, mean arterial pressure, HbA1c, triglycerides, history of  
45 376 CVD, gout, thiazide use, loop diuretics use, and H2RAs use, sedentary time, total water intake,  
46 377 albumin-adjusted calcium, and eGFR. The shaded part represents the 95% CI.

47 378 **Supplementary Fig. 1** Dose-response relationships between time of PPIs use and kidney stones  
48 379 after PSM. (A) Time of PPIs use and kidney stones; (B) Time of PPIs use and recurrent kidney  
49 380 stones.

381 Abbreviations: OR, odds ratio; PPIs, proton pump inhibitors; PSM, propensity score matching.  
 382 Adjusted for age, sex, race, education level, smoking, alcohol consumption, BMI, mean arterial  
 383 pressure, HbA1c, triglycerides, history of CVD, gout, thiazide use, loop diuretics use, and H2RAs  
 384 use, sedentary time, total water intake, albumin-adjusted calcium, and eGFR. The shaded part  
 385 represents the 95% CI.

386 **Supplementary Fig. 2** Forest plot showing the association between PPI use and kidney stones.

387

Table 1. Demographic and clinic characteristics according to PPIs use. NHANES 2007–2018\*

| Characteristics                                                   | Total Adults<br>(N = 27,075) | Non-user<br>(N = 24,643) | PPIs user<br>(N = 2,432) | P value |
|-------------------------------------------------------------------|------------------------------|--------------------------|--------------------------|---------|
| Age, years, mean (SE)                                             | 47.46(0.26)                  | 46.38(0.25)              | 59.05(0.47)              | < 0.001 |
| Female, n (%)                                                     | 13711(51.13)                 | 12335(50.63)             | 1376(56.43)              | < 0.001 |
| Race (Non-Hispanic White), n (%)                                  | 11470(66.93)                 | 10153(65.94)             | 1317(77.61)              | < 0.001 |
| Education, n (%)                                                  |                              |                          |                          | < 0.001 |
| Grades 0–12                                                       | 6368(23.03)                  | 5671(14.72)              | 697(17.85)               |         |
| High school graduate/GED                                          | 6189(14.99)                  | 5593(22.69)              | 596(26.69)               |         |
| Some college or above                                             | 14518(61.98)                 | 13379(62.58)             | 1139(55.46)              |         |
| Smoking <sup>†</sup> , n (%)                                      | 5477(19.65)                  | 5035(19.81)              | 442(17.93)               | 0.143   |
| Alcohol consumption, n (%)                                        | 6469(26.38)                  | 6010(26.73)              | 459(22.63)               | 0.017   |
| BMI, kg/m <sup>2</sup> , mean (SE)                                | 29.05(0.09)                  | 28.88(0.09)              | 30.89(0.22)              | < 0.001 |
| Weight status ( $\geq 25$ kg/m <sup>2</sup> ), n (%) <sup>‡</sup> | 19423(70.54)                 | 17439(69.47)             | 1984(81.95)              | < 0.001 |
| Sedentary time, hours/day, mean (SE)                              | 368.10(2.86)                 | 365.58(2.96)             | 395.13(5.96)             | < 0.001 |
| Mean arterial pressure, mmHg, mean (SE)                           | 87.98(0.16)                  | 87.83(0.17)              | 89.59(0.35)              | < 0.001 |
| Total water intake, g, mean (SE)                                  | 1171.48(15.90)               | 1180.99(16.29)           | 1069.41(30.63)           | < 0.001 |
| HbA1c, %, mean (SE)                                               | 5.63(0.01)                   | 5.61(0.01)               | 5.89(0.03)               | < 0.001 |
| Triglycerides, mmol/L, mean (SE)                                  | 1.75(0.02)                   | 1.73(0.02)               | 1.97(0.04)               | < 0.001 |
| Albumin-adjusted calcium, mmol/L, mean (SE)                       | 2.28(0.00)                   | 2.28(0.00)               | 2.30(0.00)               | < 0.001 |
| eGFR, mL/min, mean (SE)                                           | 94.33(0.33)                  | 95.55(0.33)              | 81.23(0.61)              | < 0.001 |
| Gout, n (%)                                                       | 403(1.25)                    | 309(1.07)                | 94(3.23)                 | < 0.001 |
| CVD, n (%)                                                        | 2595(9.584)                  | 2050(6.641)              | 545(17.438)              | < 0.001 |
| Congestive heart failure                                          | 805(2.20)                    | 589(1.76)                | 216(6.88)                | < 0.001 |
| Coronary heart disease                                            | 1080(3.34)                   | 829(2.87)                | 251(8.39)                | < 0.001 |
| Myocardial infarction                                             | 1082(3.01)                   | 828(2.56)                | 254(7.82)                | < 0.001 |
| Stroke                                                            | 984(2.78)                    | 788(2.43)                | 196(6.47)                | < 0.001 |
| Thiazide user, n (%)                                              | 2748(8.66)                   | 2256(7.81)               | 492(17.75)               | < 0.001 |
| Loop diuretics user, n (%)                                        | 876(2.46)                    | 626(1.91)                | 250(8.35)                | < 0.001 |
| H2RAs user, n (%)                                                 | 643(2.33)                    | 550(2.26)                | 93(3.12)                 | 0.030   |
| Kidney stones, n (%)                                              | 2589(9.80)                   | 2217(9.23)               | 372(15.88)               | < 0.001 |



388 Abbreviations: NHANES, National Health and Nutrition Examination Survey; PPIs, proton pump inhibitors; SE, standard error;  
 389 GED, General Equivalency Diploma; BMI, body mass index; eGFR, effective glomerular filtration rate; CVD, cardiovascular  
 390 disease; H2RAs, H2-receptor antagonist.  
 391 \*Means and percentages were adjusted for survey weights of NHANES.  
 392 †Smoking was defined as smoking at least 100 cigarettes during their lifetime.  
 393 ‡BMI was calculated by dividing weight in kilograms (kg) by height in meters squared (m<sup>2</sup>). Participants were classified as  
 394 normal weight (BMI < 25 kg/m<sup>2</sup>), and overweight/obese (BMI ≥ 25 kg/m<sup>2</sup>).  
 395

Table 2. OR (95% CI) for kidney stones across PPIs use\*

|                                                                                               | Crude model     | Model 1         | Model 2         | Model 3         |
|-----------------------------------------------------------------------------------------------|-----------------|-----------------|-----------------|-----------------|
| <b>Kidney stones (N = 2,589) VS Non-kidney stone (N = 24,486) (NHANES 2007–2018)</b>          |                 |                 |                 |                 |
| <b>PPIs use</b>                                                                               |                 |                 |                 |                 |
| No                                                                                            | 1[Reference]    | 1[Reference]    | 1[Reference]    | 1[Reference]    |
| Yes                                                                                           | 1.86(1.55,2.22) | 1.42(1.18,1.72) | 1.32(1.09,1.61) | 1.31(1.07,1.60) |
| <b>Time of use (years)</b>                                                                    | 1.09(1.07,1.12) | 1.05(1.02,1.08) | 1.04(1.01,1.07) | 1.04(1.01,1.07) |
| <b>Recurrent kidney stones (N = 550) VS first kidney stone (N = 1,138) (NHANES 2007–2014)</b> |                 |                 |                 |                 |
| <b>PPIs use</b>                                                                               |                 |                 |                 |                 |
| No                                                                                            | 1[Reference]    | 1[Reference]    | 1[Reference]    | 1[Reference]    |
| Yes                                                                                           | 1.49(1.05,2.09) | 1.49(1.05,2.13) | 1.47(1.03,2.10) | 1.49(1.04,2.13) |
| <b>Time of use (years)</b>                                                                    | 1.07(1.01,1.12) | 1.06(1.01,1.12) | 1.06(1.01,1.12) | 1.07(1.01,1.13) |

396 Abbreviations: OR, odds ratio; CI, confidence interval; PPIs, proton pump inhibitors.

397 \*Values are numerical values or weighted OR (95% CI).

398 Model 1 was adjusted for age, sex, race, education level, smoking, and alcohol consumption;

399 Model 2 was adjusted for age, sex, race, education level, smoking, alcohol consumption, BMI, mean arterial pressure, HbA1c,  
 400 triglycerides, history of CVD, thiazide use, loop diuretics use, and H2RAs use.

401 Model 3 was additionally adjusted for sedentary time, total water intake, albumin-adjusted calcium, eGFR and history of gout.

402

Table 3. OR (95% CI) for kidney stones across time of PPIs use stratified by selected factors\*

|                        | Kidney stones VS Non-kidney stone |         |                   | Recurrent kidney stones VS first kidney stone |         |                   |
|------------------------|-----------------------------------|---------|-------------------|-----------------------------------------------|---------|-------------------|
|                        | OR (95% CI)                       | P value | P for interaction | OR (95% CI)                                   | P value | P for interaction |
| <b>Age</b>             |                                   |         | 0.439             |                                               |         | 0.419             |
| < 50 years             | 1.05(0.98, 1.11)                  | 0.150   |                   | 1.11(0.98, 1.27)                              | 0.104   |                   |
| ≥ 50 years             | 1.04(1.01,1.07)                   | 0.004   |                   | 1.07(1.00,1.14)                               | 0.053   |                   |
| <b>Sex</b>             |                                   |         | 0.856             |                                               |         | 0.623             |
| Female                 | 1.06(1.02,1.10)                   | 0.004   |                   | 1.08(0.99,1.18)                               | 0.099   |                   |
| Male                   | 1.02(0.98,1.07)                   | 0.258   |                   | 1.06(0.98,1.14)                               | 0.156   |                   |
| <b>Race</b>            |                                   |         | 0.365             |                                               |         | 0.282             |
| Non-Hispanic           |                                   |         |                   |                                               |         |                   |
| White                  | 1.04(1.01,1.07)                   | 0.005   |                   | 1.11(1.01, 1.22)                              | 0.037   |                   |
| Other                  | 1.02(0.98,1.06)                   | 0.422   |                   | 1.07(1.00,1.13)                               | 0.038   |                   |
| <b>BMI</b>             |                                   |         | 0.684             |                                               |         | 0.922             |
| < 25 kg/m <sup>2</sup> | 1.06(0.98,1.14)                   | 0.134   |                   | 1.04(0.90, 1.22)                              | 0.569   |                   |
| ≥ 25 kg/m <sup>2</sup> | 1.04(1.01,1.06)                   | 0.013   |                   | 1.07(1.01,1.15)                               | 0.029   |                   |

403 Abbreviations: OR, odds ratio; CI, confidence interval; PPIs, proton pump inhibitors; BMI, Body mass index.

1  
2  
3 404 \*Values are numerical values or weighted *OR* (95% *CI*).  
4 405 Adjusted for age, sex, race, education level, smoking, alcohol consumption, BMI, mean arterial pressure, HbA1c, triglycerides,  
5 406 history of CVD, gout, thiazide use, loop diuretics use, and H2RAs use, sedentary time, total water intake, albumin-adjusted  
6 407 calcium, and eGFR, if not already stratified.  
7  
8  
9  
10  
11  
12  
13  
14  
15  
16  
17  
18  
19  
20  
21  
22  
23  
24  
25  
26  
27  
28  
29  
30  
31  
32  
33  
34  
35  
36  
37  
38  
39  
40  
41  
42  
43  
44  
45  
46  
47  
48  
49  
50  
51  
52  
53  
54  
55  
56  
57  
58  
59  
60

For peer review only

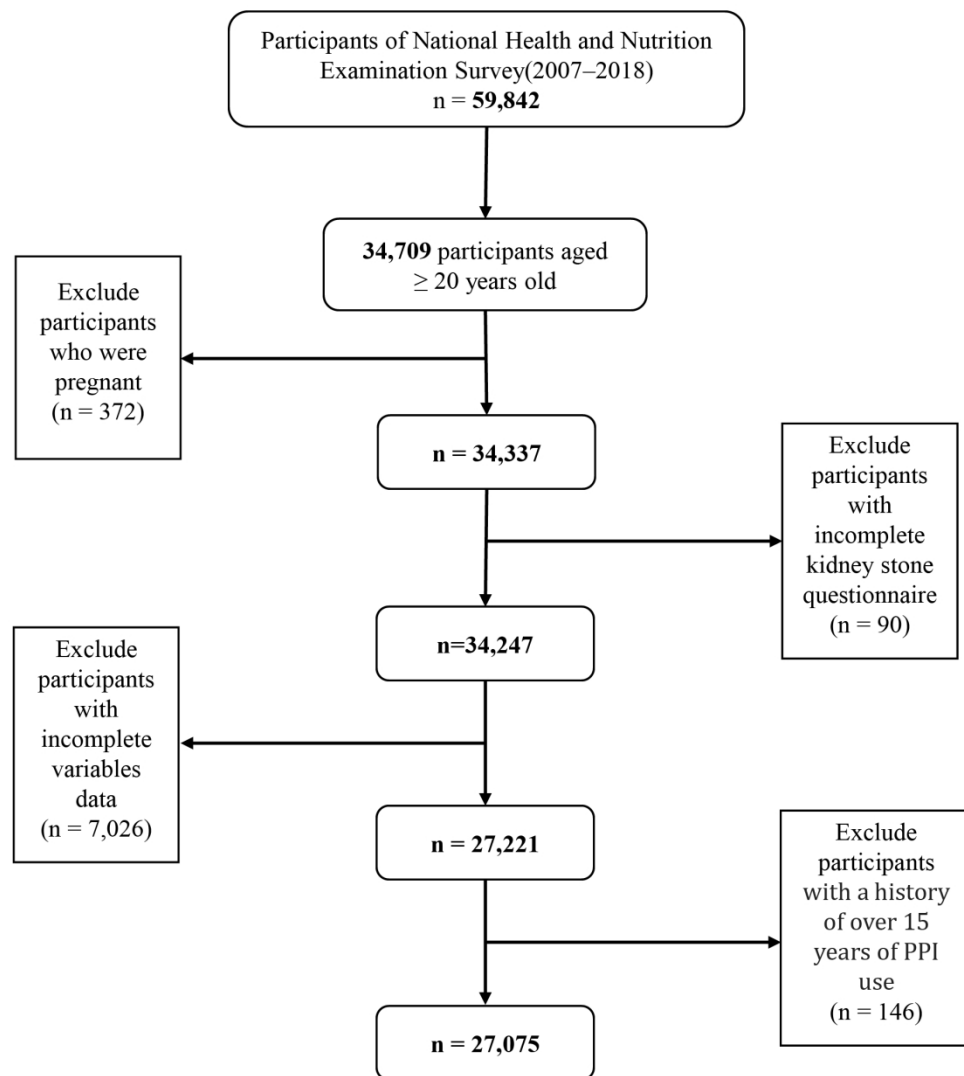

42  
43  
44  
45  
46  
47  
48  
49  
50  
51  
52  
53  
54  
55  
56  
57  
58  
59  
60

Fig. 1 Study flowchart. Of 59,842 participants in the 2007–2018 National Health and Nutrition Examination Survey (NHANES), 27,075 remained after fulfilling inclusion and exclusion criteria.

169x190mm (300 x 300 DPI)

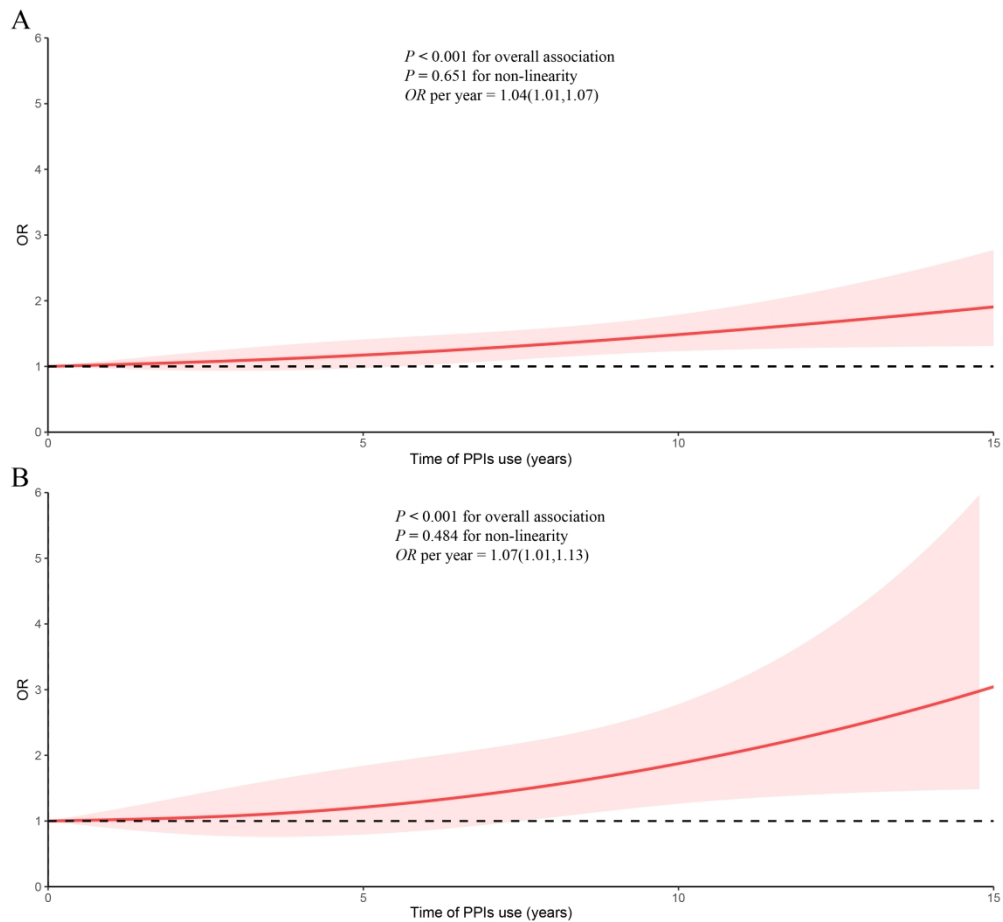

Fig. 2 Dose-response relationships between time of PPIs use and kidney stones. (A) Time of PPIs use and kidney stones; (B) Time of PPIs use and recurrent kidney stones. Abbreviations: OR, odds ratio; PPIs, proton pump inhibitors. Adjusted for age, sex, race, education level, smoking, alcohol consumption, BMI, mean arterial pressure, HbA1c, triglycerides, history of CVD, gout, thiazide use, loop diuretics use, and H2RAs use, sedentary time, total water intake, albumin-adjusted calcium, and eGFR. The shaded part represents the 95% CI.

263x243mm (300 x 300 DPI)

1  
2  
3  
4  
5  
6  
7  
8  
9  
10  
11  
12  
13  
14  
15  
16  
17  
18  
19  
20  
21  
22  
23  
24  
25  
26  
27  
28  
29  
30  
31  
32  
33  
34  
35  
36  
37  
38  
39  
40  
41  
42  
43  
44  
45  
46  
47  
48  
49  
50  
51  
52  
53  
54  
55  
56  
57  
58  
59  
60

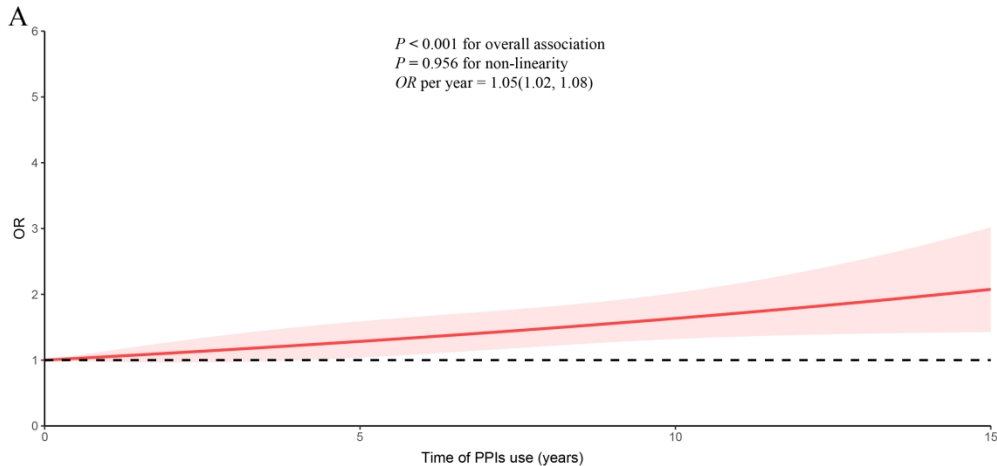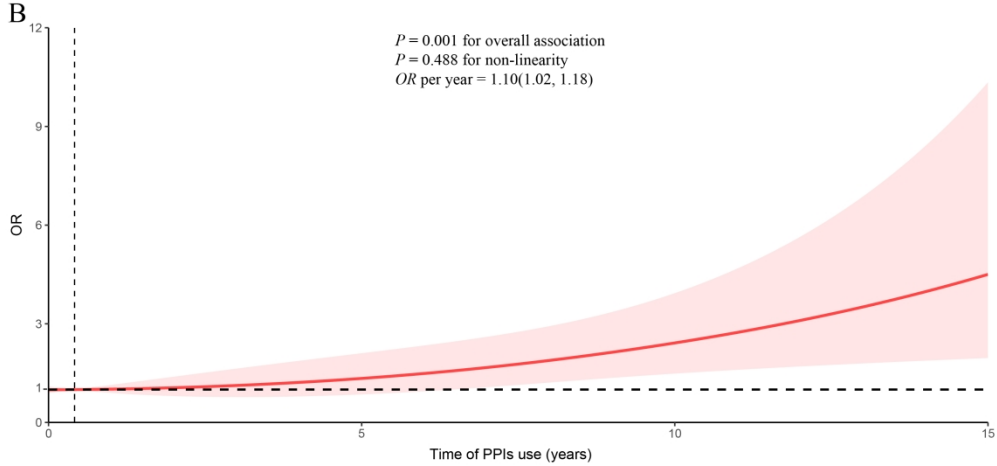

263x246mm (300 x 300 DPI)

| Study                       | HR/OR                                                                               | HR/OR | 95%CI        | Weight (fixed) | Weight (random) |
|-----------------------------|-------------------------------------------------------------------------------------|-------|--------------|----------------|-----------------|
| <b>The present study</b>    |  | 1.31  | [1.07; 1.60] | 3.8%           | 23.7%           |
| Sui et al. 2022             |  | 1.19  | [1.06; 1.34] | 11.2%          | 25.1%           |
| Kim et al. 2022             |  | 2.49  | [2.33; 2.66] | 35.1%          | 25.6%           |
| Simonov et al. 2021         |  | 1.25  | [1.19; 1.33] | 49.8%          | 25.6%           |
| <b>Fixed effect model</b>   |  | 1.59  | [1.53; 1.65] | 100.0%         | --              |
| <b>Random effects model</b> |  | 1.49  | [1.05; 2.10] | --             | 100.0%          |

For peer review only - <http://bmjopen.bmj.com/site/about/guidelines.xhtml>

1 2 3

1  
2  
3  
4  
5  
6  
7  
8  
9  
10  
11

Supplementary Table 1. Collinearity analysis

| <b>Variables</b>         | <b>VIF</b> |
|--------------------------|------------|
| Age                      | 3.80       |
| Sex                      | 1.54       |
| Race/ethnicity           | 1.85       |
| Education                | 2.50       |
| Smoking                  | 2.08       |
| Alcohol consumption      | 1.75       |
| BMI                      | 1.26       |
| Sedentary time           | 1.54       |
| Mean arterial pressure   | 1.25       |
| Total water intake       | 1.99       |
| HbA1c                    | 1.81       |
| Triglycerides            | 1.44       |
| Albumin-adjusted calcium | 1.97       |
| eGFR                     | 3.72       |
| CVD                      | 1.77       |
| Thiazide use             | 1.78       |
| Loop diuretics use       | 1.56       |
| H2RAs use                | 1.27       |

Abbreviations: VIF, variance inflation factor; BMI, body mass index; eGFR, effective glomerular filtration rate; CVD, cardiovascular disease; H2RAs, H2-receptor antagonist.

Supplementary Table 2. Demographic and clinic characteristics according to PPIs use after PSM. NHANES 2007–2018\*

| Characteristics                                                      | Total Adults<br>(N = 4,864) | Non-user<br>(N = 2,432) | PPIs user<br>(N = 2,432) | P value |
|----------------------------------------------------------------------|-----------------------------|-------------------------|--------------------------|---------|
| Age, years, mean (SE)                                                | 59.15(0.35)                 | 59.24(0.42)             | 59.05(0.47)              | 0.733   |
| Female, n (%)                                                        | 2679(56.73)                 | 1303(57.02)             | 1376(56.43)              | 0.800   |
| Race (Non-Hispanic White),<br>n (%)                                  | 2634(78.13)                 | 1317(78.63)             | 1317(77.61)              | 0.460   |
| Education, n (%)                                                     |                             |                         |                          | 0.760   |
| Grades 0–12                                                          | 1379(17.54)                 | 682(17.24)              | 697(17.85)               |         |
| High school graduate/GED                                             | 1217(26.31)                 | 621(25.95)              | 596(26.69)               |         |
| Some college or above                                                | 2268(56.14)                 | 1129(56.80)             | 1139(55.46)              |         |
| Smoking <sup>†</sup> , n (%)                                         | 904(18.71)                  | 462(19.46)              | 442(17.93)               | 0.715   |
| Alcohol consumption, n (%)                                           | 952(22.76)                  | 493(22.89)              | 459(22.63)               | 0.902   |
| BMI, kg/m <sup>2</sup> , mean (SE)                                   | 30.64(0.17)                 | 30.41(0.23)             | 30.89(0.22)              | 0.113   |
| Weight status ( $\geq 25$ kg/m <sup>2</sup> ), n<br>(%) <sup>‡</sup> | 4013(82.25)                 | 2029(82.531)            | 1984(81.948)             | 0.715   |
| Sedentary time, hours/day,<br>mean (SE)                              | 390.48(4.72)                | 386.03(6.16)            | 395.13(5.96)             | 0.236   |
| Mean arterial pressure,<br>mmHg, mean (SE)                           | 89.92(0.29)                 | 90.25(0.40)             | 89.59(0.35)              | 0.194   |
| Total water intake, g, mean<br>(SE)                                  | 1058.14(24.20)              | 1047.33(32.08)          | 1069.41(30.63)           | 0.582   |
| HbA1c, %, mean (SE)                                                  | 5.89(0.02)                  | 5.89(0.03)              | 5.89(0.03)               | 0.917   |
| Triglycerides, mmol/L, mean<br>(SE)                                  | 1.96(0.03)                  | 1.95(0.03)              | 1.97(0.04)               | 0.716   |
| Albumin-adjusted calcium,<br>mmol/L, mean (SE)                       | 2.30(0.00)                  | 2.30(0.00)              | 2.30(0.00)               | 0.939   |
| eGFR, mL/min, mean (SE)                                              | 81.68(0.45)                 | 82.11(0.63)             | 81.23(0.61)              | 0.306   |
| Gout, n (%)                                                          | 169(2.83)                   | 75(2.44)                | 94(3.23)                 | 0.216   |
| CVD, n (%)                                                           |                             |                         |                          |         |
| Congestive heart failure                                             | 365(5.64)                   | 149(4.45)               | 216(6.88)                | 0.006   |
| Coronary heart disease                                               | 435(7.39)                   | 184(6.44)               | 251(8.39)                | 0.051   |
| Myocardial infarction                                                | 430(6.67)                   | 176(5.57)               | 254(7.82)                | 0.016   |
| Stroke                                                               | 380(6.52)                   | 184(6.57)               | 196(6.47)                | 0.910   |
| Thiazide user, n (%)                                                 | 983(17.98)                  | 491(18.20)              | 492(17.75)               | 0.776   |
| Loop diuretics user, n (%)                                           | 436(7.13)                   | 186(5.97)               | 250(8.35)                | 0.016   |
| H2RAs user, n (%)                                                    | 168(3.11)                   | 75(3.10)                | 93(3.12)                 | 0.979   |
| Kidney stones, n (%)                                                 | 658(13.51)                  | 286(11.23)              | 372(15.88)               | 0.002   |

Abbreviations: PPIs, proton pump inhibitors; PSM, propensity score matching; NHANES, National Health and Nutrition Examination Survey; SE, standard error; GED, General Equivalency Diploma; BMI, body mass index; eGFR, effective glomerular filtration rate; CVD, cardiovascular disease; H2RAs, H2-receptor antagonist.

\*Means and percentages were adjusted for survey weights of NHANES.

<sup>†</sup>Smoking was defined as smoking at least 100 cigarettes during their lifetime.

<sup>‡</sup>BMI was calculated by dividing weight in kilograms (kg) by height in meters squared (m<sup>2</sup>). Participants were classified as normal weight (BMI < 25 kg/m<sup>2</sup>), and overweight/obese (BMI  $\geq$  25 kg/m<sup>2</sup>).



Supplementary Table 3. Sensitivity analyses of the associations between kidney stones and PPIs use after additional adjustment for vitamin C intake, caffeine intake and dietary inflammation index\*

|                                                                                               | Model ( <i>OR</i> [95% <i>CI</i> ]) | <i>P</i> -value |
|-----------------------------------------------------------------------------------------------|-------------------------------------|-----------------|
| <b>Kidney stones (N = 2,589) VS Non-kidney stone (N = 24,486) (NHANES 2007–2018)</b>          |                                     |                 |
| <b>PPIs use</b>                                                                               |                                     |                 |
| No                                                                                            | 1[Reference]                        | 0.01            |
| Yes                                                                                           | 1.31(1.07,1.60)                     |                 |
| <b>Time of use (years)</b>                                                                    | 1.04(1.01,1.07)                     | 0.004           |
| <b>Recurrent kidney stones (N = 550) VS first kidney stone (N = 1,138) (NHANES 2007–2014)</b> |                                     |                 |
| <b>PPIs use</b>                                                                               |                                     |                 |
| No                                                                                            | 1[Reference]                        | 0.03            |
| Yes                                                                                           | 1.49(1.04,2.13)                     |                 |
| <b>Time of use (years)</b>                                                                    | 1.07(1.01,1.13)                     | 0.03            |

Abbreviations: *OR*, odds ratio; *CI*, confidence interval; PPIs, proton pump inhibitors.

\*Values are numerical values or weighted *OR* (95% *CI*).

Model was adjusted for age, sex, race, education level, smoking, alcohol consumption, BMI, mean arterial pressure, HbA1c, triglycerides, history of CVD, thiazide use, loop diuretics use, H2RAs use, sedentary time, total water intake, albumin-adjusted calcium, eGFR history of gout, vitamin C intake, caffeine intake and dietary inflammation index.

1  
2  
3  
4  
5  
6  
7  
8  
9  
10  
11  
12  
13  
14  
15  
16  
17  
18  
19  
20  
21  
22  
23  
24  
25  
26  
27  
28  
29  
30  
31  
32  
33  
34  
35  
36  
37  
38  
39  
40  
41  
42  
43  
44  
45  
46  
47  
48  
49  
50  
51  
52  
53  
54  
55  
56  
57  
58  
59  
60

For peer review only

**STROBE 2007 (v4) Statement—Checklist of items that should be included in reports of *cross-sectional studies***

| Section/Topic                | Item # | Recommendation                                                                                                                                                                       | Reported on page # |
|------------------------------|--------|--------------------------------------------------------------------------------------------------------------------------------------------------------------------------------------|--------------------|
| <b>Title and abstract</b>    | 1      | (a) Indicate the study’s design with a commonly used term in the title or the abstract                                                                                               | 1                  |
|                              |        | (b) Provide in the abstract an informative and balanced summary of what was done and what was found                                                                                  | 1-2                |
| <b>Introduction</b>          |        |                                                                                                                                                                                      |                    |
| Background/rationale         | 2      | Explain the scientific background and rationale for the investigation being reported                                                                                                 | 2-3                |
| Objectives                   | 3      | State specific objectives, including any prespecified hypotheses                                                                                                                     | 3                  |
| <b>Methods</b>               |        |                                                                                                                                                                                      |                    |
| Study design                 | 4      | Present key elements of study design early in the paper                                                                                                                              | 3                  |
| Setting                      | 5      | Describe the setting, locations, and relevant dates, including periods of recruitment, exposure, follow-up, and data collection                                                      | 3-4                |
| Participants                 | 6      | (a) Give the eligibility criteria, and the sources and methods of selection of participants                                                                                          | 3-4                |
| Variables                    | 7      | Clearly define all outcomes, exposures, predictors, potential confounders, and effect modifiers. Give diagnostic criteria, if applicable                                             | 3-4                |
| Data sources/<br>measurement | 8*     | For each variable of interest, give sources of data and details of methods of assessment (measurement). Describe comparability of assessment methods if there is more than one group | 3-4                |
| Bias                         | 9      | <i>Describe any efforts to address potential sources of bias</i>                                                                                                                     | 3-4                |
| Study size                   | 10     | Explain how the study size was arrived at                                                                                                                                            | 3                  |
| Quantitative variables       | 11     | Explain how quantitative variables were handled in the analyses. If applicable, describe which groupings were chosen and why                                                         | 3-4                |
| Statistical methods          | 12     | (a) Describe all statistical methods, including those used to control for confounding                                                                                                | 4-5                |
|                              |        | (b) Describe any methods used to examine subgroups and interactions                                                                                                                  | 4-5                |
|                              |        | (c) Explain how missing data were addressed                                                                                                                                          | 4-5                |
|                              |        | (d) If applicable, describe analytical methods taking account of sampling strategy                                                                                                   | 4-5                |
|                              |        | (e) Describe any sensitivity analyses                                                                                                                                                | 4-5                |
| <b>Results</b>               |        |                                                                                                                                                                                      |                    |

|                          |     |                                                                                                                                                                                                              |      |
|--------------------------|-----|--------------------------------------------------------------------------------------------------------------------------------------------------------------------------------------------------------------|------|
| Participants             | 13* | (a) Report numbers of individuals at each stage of study—eg numbers potentially eligible, examined for eligibility, confirmed eligible, included in the study, completing follow-up, and analysed            | 5    |
|                          |     | (b) Give reasons for non-participation at each stage                                                                                                                                                         | 3, 5 |
|                          |     | (c) Consider use of a flow diagram                                                                                                                                                                           | 5    |
| Descriptive data         | 14* | (a) Give characteristics of study participants (eg demographic, clinical, social) and information on exposures and potential confounders                                                                     | 5    |
|                          |     | (b) Indicate number of participants with missing data for each variable of interest                                                                                                                          | 5    |
| Outcome data             | 15* | Report numbers of outcome events or summary measures                                                                                                                                                         | 6-7  |
| Main results             | 16  | (a) Give unadjusted estimates and, if applicable, confounder-adjusted estimates and their precision (eg, 95% confidence interval). Make clear which confounders were adjusted for and why they were included | 6-7  |
|                          |     | (b) Report category boundaries when continuous variables were categorized                                                                                                                                    | 6-7  |
|                          |     | (c) If relevant, consider translating estimates of relative risk into absolute risk for a meaningful time period                                                                                             | 6-7  |
| Other analyses           | 17  | Report other analyses done—eg analyses of subgroups and interactions, and sensitivity analyses                                                                                                               | 7    |
| <b>Discussion</b>        |     |                                                                                                                                                                                                              |      |
| Key results              | 18  | Summarise key results with reference to study objectives                                                                                                                                                     | 7    |
| Limitations              | 19  | Discuss limitations of the study, taking into account sources of potential bias or imprecision. Discuss both direction and magnitude of any potential bias                                                   | 9    |
| Interpretation           | 20  | Give a cautious overall interpretation of results considering objectives, limitations, multiplicity of analyses, results from similar studies, and other relevant evidence                                   | 7-9  |
| Generalisability         | 21  | Discuss the generalisability (external validity) of the study results                                                                                                                                        | 7-9  |
| <b>Other information</b> |     |                                                                                                                                                                                                              |      |
| Funding                  | 22  | Give the source of funding and the role of the funders for the present study and, if applicable, for the original study on which the present article is based                                                | 10   |

\*Give information separately for cases and controls in case-control studies and, if applicable, for exposed and unexposed groups in cohort and cross-sectional studies.

**Note:** An Explanation and Elaboration article discusses each checklist item and gives methodological background and published examples of transparent reporting. The STROBE checklist is best used in conjunction with this article (freely available on the Web sites of PLoS Medicine at <http://www.plosmedicine.org/>, Annals of Internal Medicine at <http://www.annals.org/>, and Epidemiology at <http://www.epidem.com/>). Information on the STROBE Initiative is available at [www.strobe-statement.org](http://www.strobe-statement.org).

# BMJ Open

## Association of proton pump inhibitor use with risk of kidney stones: an analysis of cross-sectional data from the US National Health and Nutrition Examination Survey (2007–2018)

|                                 |                                                                                                                                                                                                                                                                                                                                                   |
|---------------------------------|---------------------------------------------------------------------------------------------------------------------------------------------------------------------------------------------------------------------------------------------------------------------------------------------------------------------------------------------------|
| Journal:                        | <i>BMJ Open</i>                                                                                                                                                                                                                                                                                                                                   |
| Manuscript ID                   | bmjopen-2023-075136.R2                                                                                                                                                                                                                                                                                                                            |
| Article Type:                   | Original research                                                                                                                                                                                                                                                                                                                                 |
| Date Submitted by the Author:   | 26-Sep-2023                                                                                                                                                                                                                                                                                                                                       |
| Complete List of Authors:       | liu, wen; Chinese Academy of Medical Sciences & Peking Union Medical College,<br>Wang, Jia; The Affiliated Hospital of Qingdao University, Department of Gastroenterology<br>Wang, Miao; Beijing Hospital, Department of Urology<br>Wang, Miaomiao; Beijing Hospital, Department of Urology<br>Liu, Ming; Beijing Hospital, Department of Urology |
| <b>Primary Subject Heading</b>: | Urology                                                                                                                                                                                                                                                                                                                                           |
| Secondary Subject Heading:      | Gastroenterology and hepatology, Public health                                                                                                                                                                                                                                                                                                    |
| Keywords:                       | Risk Factors, Urolithiasis < UROLOGY, Adverse events < THERAPEUTICS                                                                                                                                                                                                                                                                               |
|                                 |                                                                                                                                                                                                                                                                                                                                                   |

SCHOLARONE™  
Manuscripts



I, the Submitting Author has the right to grant and does grant on behalf of all authors of the Work (as defined in the below author licence), an exclusive licence and/or a non-exclusive licence for contributions from authors who are: i) UK Crown employees; ii) where BMJ has agreed a CC-BY licence shall apply, and/or iii) in accordance with the terms applicable for US Federal Government officers or employees acting as part of their official duties; on a worldwide, perpetual, irrevocable, royalty-free basis to BMJ Publishing Group Ltd ("BMJ") its licensees and where the relevant Journal is co-owned by BMJ to the co-owners of the Journal, to publish the Work in this journal and any other BMJ products and to exploit all rights, as set out in our [licence](#).

The Submitting Author accepts and understands that any supply made under these terms is made by BMJ to the Submitting Author unless you are acting as an employee on behalf of your employer or a postgraduate student of an affiliated institution which is paying any applicable article publishing charge ("APC") for Open Access articles. Where the Submitting Author wishes to make the Work available on an Open Access basis (and intends to pay the relevant APC), the terms of reuse of such Open Access shall be governed by a Creative Commons licence – details of these licences and which [Creative Commons](#) licence will apply to this Work are set out in our licence referred to above.

Other than as permitted in any relevant BMJ Author's Self Archiving Policies, I confirm this Work has not been accepted for publication elsewhere, is not being considered for publication elsewhere and does not duplicate material already published. I confirm all authors consent to publication of this Work and authorise the granting of this licence.

1  
2  
3  
4 1 **Association of proton pump inhibitor use with risk of kidney stones: an analysis**  
5 2 **of cross-sectional data from the US National Health and Nutrition Examination**  
6 3 **Survey (2007–2018)**  
7  
8  
9  
10 4

11 5 **Wen Liu<sup>1,2†</sup>, Jia Wang<sup>3†</sup>, Miao Wang<sup>1</sup>, Miaomiao Wang<sup>1,2</sup>, and Ming Liu<sup>1,2\*</sup>**  
12  
13 6

14  
15 7 1 Department of Urology, Beijing Hospital, National Center of Gerontology, Institute of Geriatric  
16 8 Medicine, Chinese Academy of Medical Sciences, Beijing, China.

17  
18  
19 9 2 Graduate School of Peking Union Medical College, Chinese Academy of Medical Sciences, Beijing,  
20 10 China.

21  
22  
23 11 3 Department of Gastroenterology, The Affiliated Hospital of Qingdao University, Qingdao, Shandong,  
24 12 China.

25  
26  
27 13 †Both authors contributed equally to this work.

28  
29 14 \*Correspondence to:

30  
31 15 Ming Liu, Department of Urology, Beijing Hospital, National Center of Gerontology, Institute of  
32 16 Geriatric Medicine, Chinese Academy of Medical Sciences, No.1 DaHua Road, Dong Dan, Beijing,  
33 17 100730, China.

34  
35  
36 18 E-mail: liumingbjh@126.com  
37  
38  
39 19

40 20 **Abstract**

41  
42 21 **Objective** Several studies have suggested a potential link between use of proton pump inhibitors  
43 22 (PPIs) and the risk of kidney stones, attributed to alterations in urine mineral levels. Our study aimed  
44 23 to investigate the association between PPI use and kidney stones in US adults.

45  
46  
47 24 **Design** Cross-sectional study.

48  
49  
50 25 **Setting** National Health and Nutrition Examination Survey (NHANES) (2007–2018).

51  
52 26 **Participants** 27,075 individuals with complete information for PPI use and history of kidney stones  
53 27 were included in this study.

54  
55  
56 28 **Outcomes and analyses** Nonlinear analysis, logistic regression analysis, and subgroup analysis  
57 29 were conducted to estimate the relationship between PPI use and the occurrence and recurrence of  
58 30 kidney stones, after adjusting for potential confounding factors.  
59  
60

1  
2  
3  
4 31 **Results** Multivariable logistic regression analysis revealed a significant association between PPI  
5  
6 32 use and kidney stones (odds ratio [OR] 1.31, 95%CI 1.07–1.60), with a 4% increase in the  
7  
8 33 prevalence of kidney stones for each additional year of PPI use ( $P < 0.001$ ). Similarly, PPI use was  
9  
10 34 significantly associated with recurrent kidney stones (OR 1.49, 95%CI 1.04–2.13), with a 7%  
11  
12 35 increase in the recurrence of kidney stones for each additional year of PPI use ( $P < 0.001$ ).  
13  
14 36 Furthermore, these associations remained significant even after conducting propensity score  
15  
16 37 matching analysis on a subset of PPI users and non-users (all  $P \leq 0.001$ ). Subgroup analyses showed  
17  
18 38 that the effects of PPI use on kidney stones differed by age, sex, race, and BMI.

19 39 **Conclusions** This study indicated that long-term use of PPI was associated with a higher risk of  
20  
21 40 both the presence and recurrence of kidney stones.  
22

23  
24  
25 41 **Keywords:** NHANES; urolithiasis; proton pump inhibitors; risk factors; drug effects  
26  
27 42  
28 43

#### 29 44 **STRENGTHS AND LIMITATIONS OF THIS STUDY**

- 30  
31 45 • The NHANES dataset comprises a representative sample of the national population to  
32  
33 46 ensure that our findings can be extrapolated to the broader population.  
34  
35 47 • Multiple potential confounders were adjusted for and a propensity score matching  
36  
37 48 analysis was performed to ensure the reliability of the results.  
38  
39 49 • It is difficult to draw causal conclusions from cross-sectional analyses.  
40  
41 50 • NHANES did not record information regarding the time and type of kidney stones or the  
42  
43 51 dosage and type of proton pump inhibitor use.  
44  
45 52

#### 46 53 **Introduction**

47  
48 54 Kidney stones are a common disease in US, with a prevalence of 12% in men and 10% in women,  
49  
50 55 and have a substantial impact in terms of cost and morbidity(1, 2). Some drugs may affect the risk  
51  
52 56 of kidney stones by altering active compounds crystallizing in urine or substances impairing urine  
53  
54 57 composition(3-5).

55  
56 58 Proton pump inhibitors (PPIs) are commonly prescribed medications worldwide for the  
57  
58 59 treatment of gastric acid-related diseases such as gastroesophageal reflux disease (GERD), H.  
59  
60 60 pylori infection, and gastric ulcers(6). However, the escalating prevalence of PPI overuse,



1  
2  
3  
4 61 especially for long-term therapy, has become a concerning issue(6, 7). Long-term PPI intake is  
5  
6 62 associated with a reduction in intestinal absorption of essential vitamins and minerals and  
7  
8 63 increased susceptibility to infections, chronic kidney disease, and dementia(7). Given that PPI can  
9  
10 64 inhibit gastric acid secretion, thereby affecting the intestinal absorption of essential minerals and  
11  
12 65 altering the levels of calcium, magnesium, and citrate(8, 9), several studies have investigated the  
13  
14 66 impact of PPI use on the risk of kidney stones(10-12). For instance, Sui et al. found that PPI use  
15  
16 67 might elevate the risk of kidney stones by lowering the levels of urinary citrate and magnesium,  
17  
18 68 which could compromise their inhibitory effect on kidney stone formation(11). However, it should  
19  
20 69 be noted that all participants in their study were GERD patients. Similarly, Simonov et al.  
21  
22 70 identified a correlation between PPI use and kidney stones primarily based on a sample of young  
23  
24 71 individuals and males(10), thereby limiting the generalizability of their findings to not only the  
25  
26 72 general population but also specific patient groups, such as recurrent stone formers(13).

27  
28 73 This study aimed to investigate the potential association between PPI use and kidney stones  
29  
30 74 by analyzing National Health and Nutrition Examination Survey (NHANES) data from 2007 to  
31  
32 75 2018. Our hypothesis was that PPI use increases the risk of both kidney stone formation and  
33  
34 76 recurrence.

## 35 77 **Methods**

### 36 78 **Study design and population**

37  
38 79 The NHANES is an ongoing cross-sectional survey that employs a sophisticated multistage sample  
39  
40 80 methodology to investigate the health and nutritional status of the non-institutionalized population  
41  
42 81 in US. Demographic characteristics, clinical history, and self-reported dietary were collected from  
43  
44 82 participants using a structured household interview. Physical examinations, including  
45  
46 83 anthropometric measurements and blood samples, were collected within a mobile examination  
47  
48 84 center. The protocol was approved by the National Center for Health Statistics (NCHS) Ethics  
49  
50 85 Review Board, and informed consent was obtained from all participants. Additional information  
51  
52 86 regarding data collection can be accessed on the NHANES website(14).

53  
54 87 Six NHANES cycles were used in the study from 2007 to 2018. Initially, 34,709 participants  
55  
56 88 aged 20 years and older were included. However, some participants were excluded: 372 participants  
57  
58 89 who were pregnant, 90 participants with incomplete kidney stone questionnaire, and 7,026  
59  
60 90 participants with incomplete variables. In addition, given the limited number of participants who

1  
2  
3  
4 91 had taken PPI for more than 15 years, the standard errors for model estimates increased  
5  
6 92 substantially(15), thus 146 participants were excluded. Finally, 27,075 participants were included  
7  
8 93 in the analysis, consisting of 13,711 females and 13,364 males. Fig. 1 illustrates the filtering process  
9  
10 94 used in this study.

### 11 95 **Outcome assessment**

12  
13 96 The primary outcome was the response to the question, “Have you ever had kidney stones?”  
14  
15 97 (NHANES 2007–2018). Participants who responded “yes” were defined as kidney stone formers.  
16  
17 98 The secondary outcome was the response to the question, “How many times have you passed a  
18  
19 99 kidney stone?” (NHANES 2007–2014). Participants who reported passing at least two stones were  
20  
21 100 classified as recurrent stone formers.

### 23 101 **Medication use**

24  
25 102 The independent variables in this study were whether participants had taken PPI and the duration of  
26  
27 103 their PPI use. Information on the types and duration of acid suppressant medication was obtained  
28  
29 104 through prescription medication questionnaires. The types of PPI in this study included omeprazole,  
30  
31 105 esomeprazole, lansoprazole, pantoprazole, and rabeprazole. For participants using PPI, the duration  
32  
33 106 of use was equal to the years since initiating therapy. Participants who did not use PPI had a duration  
34  
35 107 of use recorded as zero. Data on specific dosages or previously discontinued prescription  
36  
37 108 medications were unavailable.

### 39 109 **Covariates**

40  
41 110 The study collected three types of detailed information about covariates through standardized  
42  
43 111 personal interviews. The first group included demographic factors including age, sex, race,  
44  
45 112 education level, smoking status, and alcohol consumption. The second group consisted of factors  
46  
47 113 that impact the body's metabolism level, including body mass index (BMI), mean arterial pressure,  
48  
49 114 HbA1c, triglyceride levels, history of cardiovascular disease (CVD), thiazide use, loop diuretic use,  
50  
51 115 and histamine-2 receptor antagonists (H2RA) use. The third group focused on risk factors related to  
52  
53 116 kidney stone formation, including sedentary time, total water intake, albumin-adjusted calcium  
54  
55 117 levels, estimated glomerular filtration rate (eGFR), and history of gout. Education level was  
56  
57 118 categorized as follows: Grades 0–12, high school graduate/General Equivalency Diploma, and some  
58  
59 119 college or above. Smokers was defined as smoking at least 100 cigarettes during their lifetime. BMI  
60  
120 was calculated by dividing weight in kilograms (kg) by height in meters squared (m<sup>2</sup>). History of

1  
2  
3  
4 121 CVD (including congestive heart failure, coronary heart disease, myocardial infarction, and stroke)  
5  
6 122 was defined if participants self-reported a history of these conditions. The Chronic Kidney Disease  
7  
8 123 Epidemiology Collaboration (CKD-EPI) equation was used to calculate eGFR(16). The CKD-EPI  
9  
10 124 equation is as follows:  $eGFR = 141 \times \min(Scr/\kappa, 1)^\alpha \times \max(Scr/\kappa, 1)^{-1.209} \times 0.993^{Age} \times 1.018$  [if  
11  
12 125 female]  $1.159$  [if black], where Scr is serum creatinine,  $\kappa$  is 0.7 for females and 0.9 for males,  $\alpha$  is  
13  
14 126  $-0.329$  for females and  $-0.411$  for males, min indicates the minimum of Scr/ $\kappa$  or 1, and max  
15  
16 127 indicates the maximum of Scr/ $\kappa$  or 1. Gout was defined as a self-reported diagnosis of gout, and/or  
17  
18 128 the use of anti-gout medication.

### 19 129 **Statistical analyses**

20  
21 130 All statistical analyses considered NHANES survey design characteristics with sampling weights.  
22  
23 131 Descriptive statistics were used to evaluate the demographic and clinic characteristics of the study  
24  
25 132 population. The variance inflation factor (VIF) was utilized to evaluate multicollinearity among  
26  
27 133 covariates and between covariates and kidney stones. A VIF value over 10 indicates  
28  
29 134 multicollinearity, but none was observed in this study (Supplementary Table 1) (17). To explore the  
30  
31 135 relationship between PPI use and kidney stones, we performed four weighted logistic regression  
32  
33 136 models and controlled for the aforementioned explanatory variables by modeling PPI as continuous  
34  
35 137 variables based on the time of use. We utilized restricted cubic splines to explore the potential non-  
36  
37 138 linear link between PPI use duration and kidney stones. Assessing model fit, we employed the  
38  
39 139 Akaike Information Criterion (AIC). Our knot selection process prioritized the model with the  
40  
41 140 lowest AIC value, leading us to choose a model with three knots located at the 5th, 50th, and 95th  
42  
43 141 centiles, as detailed in Supplementary Table 2. Subgroup analyses were also performed to explore  
44  
45 142 whether the relationship between the time of PPI use and kidney stones differed by age, sex, race,  
46  
47 143 and BMI, and potential effect modifiers were tested using the Wald test for multiplicative  
48  
49 144 interactions. Additionally, a 1:1 propensity score matching (PSM) analysis was performed to  
50  
51 145 balance population differences between PPI users and non-users while adjusting for all confounding  
52  
53 146 variables. Previous studies have established links between kidney stones and dietary factors, such  
54  
55 147 as vitamin C intake, caffeine consumption, and the dietary inflammatory index (DII)(18-20). To  
56  
57 148 address potential confounding effects, a sensitivity analysis was conducted using model 3 as the  
58  
59 149 baseline, with additional adjustments made for three variables: vitamin C intake, caffeine intake,  
60  
150 150 and DII. We conducted a meta-analysis using the 'meta' package, which allowed us to combine data

1  
2  
3  
4 151 from relevant studies and estimate an overall effect size for the association between PPI use and  
5  
6 152 kidney stones. All statistical tests were two-sided, and P-values < 0.05 (two-sided) were considered  
7  
8 153 statistically significant. R 4.2.2 software was used for modeling.

#### 9 154 **Patient and public involvement**

11 155 None.

### 13 156 **Results**

#### 15 157 **Population characteristics**

17 158 This analysis included 27,075 participants aged 20 years and older from the NHANES database  
18  
19 159 (2007–2018), representing 203,076,872 adults. And table 1 presents their demographic and  
20  
21 160 clinical characteristics based on PPI use. The mean age of all participants was  $47.46 \pm 0.26$   
22  
23 161 (standard error) years, with roughly equal representation of females (51.13%) and males (48.87%).  
24  
25 162 PPI users were more likely to be older, females, non-Hispanic white, obese, have lower education  
26  
27 163 level, alcohol consumption, total water intake, eGFR, higher sedentary time, mean arterial  
28  
29 164 pressure, HbA1c, triglycerides, albumin-adjusted calcium. PPI users were taking more thiazide,  
30  
31 165 loop diuretics, and H2RAs medications compared to non-users. Furthermore, CVD, gout and  
32  
33 166 kidney stone diseases were more common in PPI users (all  $P < 0.05$ ).

#### 35 167 **Multivariable logistic regression analyses**

36  
37 168 Weighted univariable and multivariable logistic regression models were used to investigate the  
38  
39 169 independent association between PPI use and the risk of kidney stones, with PPI non-user as the  
40  
41 170 reference group (Table 2). In the crude model, PPI use showed a significantly positive association  
42  
43 171 with the prevalence of kidney stones ( $OR = 1.86$ ,  $95\%CI = 1.55–2.22$ ). In the fully adjusted model  
44  
45 172 (model 3), the association between PPI use and the prevalence of kidney stones remained significant  
46  
47 173 ( $OR = 1.31$ ,  $95\%CI = 1.07–1.60$ ). When considering PPI use as a continuous variable, the restricted  
48  
49 174 cubic spline analyses indicated a linear relationship between the duration of PPI use and the  
50  
51 175 prevalence of kidney stones ( $P$  for non-linearity = 0.651) (Fig. 2A). With each additional year of  
52  
53 176 PPI use, the prevalence of kidney stones increased by 4% (Table 2). Additionally, we explored the  
54  
55 177 association between PPI use and recurrent kidney stones. In the crude model, PPI use showed a  
56  
57 178 significantly positive association with the recurrence of kidney stones ( $OR = 1.49$ ,  $95\%CI = 1.05–$   
58  
59 179  $2.09$ ). This positive association persisted in the fully adjusted model (model 3) ( $OR = 1.49$ ,  $95\%CI$   
60  
180  $= 1.04–2.13$ ). The duration of PPI use exhibited a linear correlation with the recurrence of kidney

1  
2  
3  
4 181 stones ( $P$  for non-linearity = 0.484) (Fig. 2B), with a 7% increase for each additional year of PPI  
5  
6 182 use (Table 2).

### 7 183 **Subgroup analyses**

8  
9 184 Moreover, subgroup analyses were performed to assess whether the relationship between the  
10  
11 185 duration of PPI use and kidney stones were influenced by age, sex, race, and BMI (Table 3). After  
12  
13 186 adjusting for all covariates, it was found that the duration of PPI use was significantly associated  
14  
15 187 with the prevalence of kidney stones in participants aged 50 years or older, females, non-Hispanic  
16  
17 188 White, and those with a BMI of 25 kg/m<sup>2</sup> or higher. On the other hand, a significant positive  
18  
19 189 association between time of PPI use and recurrent kidney stones was observed only in participants  
20  
21 190 non-Hispanic White, and those with a BMI of 25 kg/m<sup>2</sup> or higher (all  $P$  for interaction > 0.05).

### 22 191 **Sensitivity analyses and meta-analysis**

23  
24 192 A 1:1 matched cohort analysis was conducted through PSM to minimize potential bias, given the  
25  
26 193 significant difference in PPI use and non-use group (Table 1). This approach confirmed 4864  
27  
28 194 participants in the matched cohort. The descriptive statistics results showed that no significant  
29  
30 195 differences observed in most variables between the PPI non-user and PPI user groups  
31  
32 196 (Supplementary Table 3). In the fully adjusted model, the dose-response curve still displayed a  
33  
34 197 positive association between the duration of PPI use and kidney stones ( $OR = 1.05$ ,  $95\%CI = 1.02-$   
35  
36 198  $1.08$ ,  $P$  for non-linearity = 0.956) (Supplementary Fig. 1A) and recurrent kidney stones ( $OR = 1.10$ ,  
37  
38 199  $95\%CI = 1.02-1.18$ ,  $P$  for non-linearity = 0.488) (Supplementary Fig. 1B). Moreover, the results  
39  
40 200 remained significant after making additional adjustments for vitamin C intake, caffeine  
41  
42 201 consumption, and DII (Supplementary Table 4). Furthermore, we performed a meta-analysis based  
43  
44 202 on our findings and previously published research, confirming a positive association between the  
45  
46 203 PPI use and the risk of kidney stones ( $OR = 1.49$ ,  $95\%CI = 1.05-2.10$ ) (Supplementary Fig. 2)(10-  
47  
48 204 12).

### 49 205 **Discussion**

50  
51 206 In this large cross-sectional study based on NHANES data from 2007 to 2018, we found that PPI  
52  
53 207 use was associated with an increased risk of kidney stones. The duration of PPI use demonstrated a  
54  
55 208 dose-response association with kidney stones. Furthermore, our study uncovered a novel association  
56  
57 209 between long-term PPI use and recurrent kidney stones in patients with a history of kidney stones,  
58  
59 210 demonstrating a significant linear correlation. Additionally, subgroup analysis found that the effects

1  
2  
3  
4 211 of age, sex, race, and BMI varied in their influence on the relationship between PPI use and the  
5  
6 212 prevalence of kidney stones.

7  
8 213 Several studies have shown that PPI use could increase the risk of kidney stones, with a dose-  
9  
10 214 response relationship(10-12). A retrospective study conducted on the Women's Veterans Cohort,  
11  
12 215 which included 465,891 individuals, revealed that PPI use was linked to a 1.25-fold higher risk of  
13  
14 216 kidney stones (95% CI = 1.19–1.33)(10). It should be noted that this study included mainly young  
15  
16 217 individuals (with a median age of 32 years) and was predominantly males (86%), thus having a  
17  
18 218 certain degree of selection bias(13). Another study by Sui et al. also found a positive association  
19  
20 219 between PPI use and kidney stones in patients with GERD, with a 1.46-fold increased risk (95%CI  
21  
22 220 = 1.38–1.55), which could help in assessing the potential risk of kidney stones associated with PPI  
23  
24 221 exposure(11). Nevertheless, both studies were limited to specific populations, limiting the  
25  
26 222 generalizability of their findings to the general population. In contrast, a nationwide population  
27  
28 223 cohort from Korea, without selection bias, also showed a positive association between PPI use and  
29  
30 224 kidney stones, displaying a dose-response relationship(12). Similarly, the current study, based on  
31  
32 225 data from the NHANES database representing over 203 million individuals, found that PPI use was  
33  
34 226 significantly associated with not only a higher risk of kidney stones, but also recurrent kidney stones.  
35  
36 227 The findings from the meta-analysis conducted in this study have confirmed the positive association  
37  
38 228 between PPI use and the risk of kidney stones. Furthermore, the risk of developing kidney stones  
39  
40 229 was found to be higher in individuals who used PPI for a longer duration, highlighting the  
41  
42 230 importance of monitoring this potential side effects of long-term PPI treatment, especially for  
43  
44 231 patients with a history of kidney stones.

45  
46 232 The mechanisms underlying the impact of PPI on kidney stone formation remain unclear.  
47  
48 233 Studies have suggested that PPI can elevate gastric pH, leading to a decrease in magnesium  
49  
50 234 absorption and urinary magnesium levels(9). Magnesium has been known to inhibit the formation  
51  
52 235 of calcium oxalate crystals in urine(21, 22). A meta-analysis of nine observational studies found a  
53  
54 236 significant increased risk of hypomagnesemia among patients using PPI(23). It should be noted that  
55  
56 237 magnesium absorption occurs through both active and passive mechanisms, and alterations in pH  
57  
58 238 do not affect passive absorption(23). Therefore, PPI use does not always result in hypomagnesemia,  
59  
60 239 but patients with impaired gastrointestinal absorptive capacity may have an increased risk of  
240  
241 240 developing hypomagnesemia. On the other hand, research has shown that citrate can inhibit the



1  
2  
3  
4 241 crystallization of calcium salts in urine, and a deficiency of citrate can increase the risk of stone  
5  
6 242 formation(24, 25). A study of 301 nephrolithiasis patients with 24-hour urine data found that PPI  
7  
8 243 exposure significantly reduced urinary citrate excretion, but did not affect urinary magnesium, pH,  
9  
10 244 or other urinary minerals(8). Similarly, another study on GERD patients reported a significant  
11  
12 245 correlation between PPI use and lower levels of urinary citrate and magnesium(11). Therefore, given  
13  
14 246 the association of PPI use with hypomagnesuria and hypocitraturia, it may monitor the levels of  
15  
16 247 urinary magnesium and citrate when using PPI.

17  
18 248 PPIs are commonly prescribed for acid-related disorders, and patients with these conditions  
19  
20 249 may be at higher risk for kidney stone formation(26). In this study, we employed the PSM analysis  
21  
22 250 to minimize potential differences between PPI users and non-users, yet still identified a significant  
23  
24 251 association between PPI use and the occurrence and recurrence of kidney stones. Subgroup analyses  
25  
26 252 further revealed that certain patient groups, including the elderly, females, non-Hispanic Whites,  
27  
28 253 and those with a BMI of 25 kg/m<sup>2</sup> or higher, exhibited a stronger positive association between PPI  
29  
30 254 use and the prevalence of kidney stones, highlighting the importance of considering potential side  
31  
32 255 effects of PPI use in these populations. While it is undeniable that PPI therapy has improved the  
33  
34 256 quality of life for many patients with acid-related disorders(27), a growing body of literature  
35  
36 257 suggested a relationship between long-term PPI use and adverse events(28). Caution should be  
37  
38 258 exercised when discontinuing PPI use for evidence-based indications(29), but global concerns over  
39  
40 259 long-term PPI overuse should not be overlooked(6, 7), especially in individuals with a history of  
41  
42 260 kidney stones and high-risk factors, such as the elderly, females, non-Hispanic Whites, and those  
43  
44 261 with a BMI of 25 kg/m<sup>2</sup> or higher, in order to reduce unnecessary use.

45  
46 262 This study has several strengths. Firstly, the NHANES dataset comprises a representative  
47  
48 263 sample of the national population, and we utilize NHANES-provided weights to ensure that our  
49  
50 264 findings can be extrapolated to the broader population. Secondly, this study not only elucidates the  
51  
52 265 correlation between PPI use and the prevalence of kidney stones but also probes its association with  
53  
54 266 the recurrence of renal calculi in individuals with a history of nephrolithiasis. Furthermore, multiple  
55  
56 267 potential confounders were adjusted and PSM design was performed to ensure the reliability of the  
57  
58 268 results. However, this study also has several limitations. Firstly, it is difficult to draw causal  
59  
60 269 conclusions from such cross-sectional analyses. Although we adjusted for three types of detailed  
270  
covariate information, there may still be unmeasured potential factors that could affect the

1  
2  
3  
4 271 association between PPI and nephrolithiasis. Secondly, the questionnaire survey may have been  
5  
6 272 prone to recall bias and reporting bias, which could affect the accuracy of the data collected. Thirdly,  
7  
8 273 NHANES lacks objective diagnostic imaging for the identification of kidney stones, potentially  
9  
10 274 resulting in the omission of asymptomatic cases. Additionally, the dataset does not provide details  
11  
12 275 on the timing and specific type of kidney stones. Finally, the lack of information about the dosage  
13  
14 276 and type of PPI use may limit the interpretability of the results.

### 15 277 **Conclusions**

16  
17 278 In conclusion, our study revealed a relationship between PPI use and the prevalence of kidney stones,  
18  
19 279 as well as an increased risk of recurrent kidney stones in patients with a history of nephrolithiasis.  
20  
21 280 To mitigate this potential adverse effect, caution should be exercised regarding unnecessary long-  
22  
23 281 term use of PPI.

### 24 25 26 27 283 **Acknowledgements**

28  
29 284 We appreciate the American Centers for Disease Control and Prevention for conducting the survey and  
30  
31 285 making it available online freely, and all the participants for providing these data.

### 32 33 286 **Contributors**

34  
35 287 W-L: conceptualization, methodology, data analysis, manuscript writing; J-W: methodology, data  
36  
37 288 collection, data analysis, manuscript writing; M-W: methodology, data collection, data analysis; MM-  
38  
39 289 W: data analysis, manuscript writing, supervision; M-L: conceptualization, supervision, manuscript  
40  
41 290 editing, funding acquisition.

### 42 43 291 **Funding**

44  
45 292 This work was supported by the National Key Research and Development Program of China  
46  
47 293 [2022YFC3602900] and National High Level Hospital Clinical Research Funding [BJ-2022-115].

### 48 49 294 **Competing interests**

50  
51 295 None declared.

### 52 53 296 **Patient consent for publication**

54  
55 297 Not applicable.

### 56 57 298 **Ethics statement**

58  
59 299 Ethical review and approval for the original research involving human participants were obtained from  
60  
300 the Ethics Review Board of the NCHS (Protocol #98-12). Written informed consent was obtained from



1  
2  
3  
4 301 all patients or participants who were part of the study. The current analysis, which is based on publicly  
5  
6 302 available data, did not require any further ethics approval.

7  
8 303 **Data availability statement**

9  
10 304 Publicly available datasets were analyzed in this study. Data are available from  
11  
12 305 <https://www.cdc.gov/nchs/nhanes/> (NHANES 2005-2006 and 2007-2008).

13  
14 306

15  
16 307 **References**

- 17 308 1. Saigal CS, Joyce G, Timilsina AR. Direct and indirect costs of nephrolithiasis in an employed  
18 309 population: opportunity for disease management? *Kidney Int.* 2005;68(4):1808-14.
- 19 310 2. Abufaraj M, Xu T, Cao C, Waldhoer T, Seitz C, D'Andrea D, et al. Prevalence and Trends in Kidney  
20 311 Stone Among Adults in the USA: Analyses of National Health and Nutrition Examination Survey 2007-  
21 312 2018 Data. *Eur Urol Focus.* 2021;7(6):1468-75.
- 22 313 3. Dauw CA, Yi Y, Bierlein MJ, Yan P, Alruwaily AF, Ghani KR, et al. Factors Associated With Preventive  
23 314 Pharmacological Therapy Adherence Among Patients With Kidney Stones. *Urology.* 2016;93:45-9.
- 24 315 4. Daudon M, Frochot V, Bazin D, Jungers P. Drug-Induced Kidney Stones and Crystalline  
25 316 Nephropathy: Pathophysiology, Prevention and Treatment. *Drugs.* 2018;78(2):163-201.
- 26 317 5. Cohen AJ, Adamsky MA, Nottingham CU, Pruitt J, Lapin B, Wang CH, et al. Impact of Statin Intake  
27 318 on Kidney Stone Formation. *Urology.* 2019;124:57-61.
- 28 319 6. Savarino V, Marabotto E, Zentilin P, Furnari M, Bodini G, De Maria C, et al. Proton pump inhibitors:  
29 320 use and misuse in the clinical setting. *Expert Rev Clin Pharmacol.* 2018;11(11):1123-34.
- 30 321 7. Eusebi LH, Rabitti S, Artesiani ML, Gelli D, Montagnani M, Zagari RM, et al. Proton pump inhibitors:  
31 322 Risks of long-term use. *J Gastroenterol Hepatol.* 2017;32(7):1295-302.
- 32 323 8. Patel PM, Kandabarow AM, Aiwerioghene E, Blanco-Martinez E, Hart S, Leehey DJ, et al. Proton-  
33 324 pump inhibitors associated with decreased urinary citrate excretion. *Int Urol Nephrol.* 2021;53(4):679-  
34 325 83.
- 35 326 9. Ito T, Jensen RT. Association of long-term proton pump inhibitor therapy with bone fractures and  
36 327 effects on absorption of calcium, vitamin B12, iron, and magnesium. *Curr Gastroenterol Rep.*  
37 328 2010;12(6):448-57.
- 38 329 10. Simonov M, Abel EA, Skanderson M, Masoud A, Hauser RG, Brandt CA, et al. Use of Proton Pump  
39 330 Inhibitors Increases Risk of Incident Kidney Stones. *Clin Gastroenterol Hepatol.* 2021;19(1):72-9.e21.
- 40 331 11. Sui W, Miller NL, Gould ER, Zhang KC, Koyama T, Hsi RS. Proton pump inhibitors use and risk of  
41 332 incident nephrolithiasis. *Urolithiasis.* 2022;50(4):401-9.
- 42 333 12. Kim SY, Yoo DM, Bang WJ, Choi HG. Association between Urolithiasis and History Proton Pump  
43 334 Inhibitor Medication: A Nested Case-Control Study. *J Clin Med.* 2022;11(19).
- 44 335 13. Pella E, Chalkidou M, Sarafidis P. Proton Pump Inhibitors, Histamine-2 Receptor Antagonists, and  
45 336 the Risk of Kidney Stones: Negligible or Not? *Clin Gastroenterol Hepatol.* 2021;19(3):624-5.
- 46 337 [dataset] 14. NHANES Questionnaires, Datasets, and Related Documentation. Available from:  
47 338 <https://www.cdc.gov/nchs/nhanes/Default.aspx>: [Accessed April 14, 2023 pp.].
- 48 339 15. Chang SL, Harshman LC, Presti JC, Jr. Impact of common medications on serum total prostate-  
49 340 specific antigen levels: analysis of the National Health and Nutrition Examination Survey. *J Clin Oncol.*  
50 341 2010;28(25):3951-7.

- 1  
2  
3 342 16. Levey AS, Stevens LA, Schmid CH, Zhang YL, Castro AF, 3rd, Feldman HI, et al. A new equation to  
4 343 estimate glomerular filtration rate. *Ann Intern Med.* 2009;150(9):604-12.  
5 344 17. Charidimou A, Martinez-Ramirez S, Reijmer YD, Oliveira-Filho J, Lauer A, Roongpiboonsopit D, et  
6 345 al. Total Magnetic Resonance Imaging Burden of Small Vessel Disease in Cerebral Amyloid Angiopathy:  
7 346 An Imaging-Pathologic Study of Concept Validation. *JAMA Neurol.* 2016;73(8):994-1001.  
8 347 18. Ferraro PM, Curhan GC, Gambaro G, Taylor EN. Total, Dietary, and Supplemental Vitamin C Intake  
9 348 and Risk of Incident Kidney Stones. *Am J Kidney Dis.* 2016;67(3):400-7.  
10 349 19. Geng J, Qiu Y, Kang Z, Li Y, Li J, Liao R, et al. The association between caffeine intake and risk of  
11 350 kidney stones: A population-based study. *Front Nutr.* 2022;9:935820.  
12 351 20. Liu N, Feng Y, Li J, Ma X, Ma F. Relationship between the dietary inflammatory index and kidney  
13 352 stone prevalence. *World J Urol.* 2022;40(6):1545-52.  
14 353 21. Schwartz BF, Bruce J, Leslie S, Stoller ML. Rethinking the role of urinary magnesium in calcium  
15 354 urolithiasis. *J Endourol.* 2001;15(3):233-5.  
16 355 22. Johansson G, Backman U, Danielson BG, Fellström B, Ljunghall S, Wikström B. Effects of  
17 356 magnesium hydroxide in renal stone disease. *J Am Coll Nutr.* 1982;1(2):179-85.  
18 357 23. Cheungpasitporn W, Thongprayoon C, Kittanamongkolchai W, Srivali N, Edmonds PJ, Ungprasert  
19 358 P, et al. Proton pump inhibitors linked to hypomagnesemia: a systematic review and meta-analysis of  
20 359 observational studies. *Ren Fail.* 2015;37(7):1237-41.  
21 360 24. Goldberg H, Grass L, Vogl R, Rapoport A, Oreopoulos DG. Urine citrate and renal stone disease.  
22 361 *Cmaj.* 1989;141(3):217-21.  
23 362 25. Pak CY. Citrate and renal calculi: an update. *Miner Electrolyte Metab.* 1994;20(6):371-7.  
24 363 26. Bapir R, Bhatti KH, Eliwa A, García-Perdomo HA, Gherabi N, Hennessey D, et al. Risk of urinary  
25 364 stone formation associated to proton pump inhibitors: A systematic review and metanalysis. *Arch Ital*  
26 365 *Urol Androl.* 2022;94(4):507-14.  
27 366 27. Moayyedi P, Armstrong D, Hunt RH, Lei Y, Bukoski M, White RJ. The gain in quality-adjusted life  
28 367 months by switching to esomeprazole in those with continued reflux symptoms in primary care:  
29 368 EnCOMPASS--a cluster-randomized trial. *Am J Gastroenterol.* 2010;105(11):2341-6.  
30 369 28. Elias E, Targownik LE. The Clinician's Guide to Proton Pump Inhibitor Related Adverse Events.  
31 370 *Drugs.* 2019;79(7):715-31.  
32 371 29. Boghossian TA, Rashid FJ, Thompson W, Welch V, Moayyedi P, Rojas-Fernandez C, et al.  
33 372 Deprescribing versus continuation of chronic proton pump inhibitor use in adults. *Cochrane Database*  
34 373 *Syst Rev.* 2017;3(3):Cd011969.

374

375 **FIGURE TITLE/LEGENDS**376 **Figure 1.** Study flowchart

377 Of 59,842 participants in the 2007–2018 National Health and Nutrition Examination Survey  
378 (NHANES), 27,075 remained after fulfilling inclusion and exclusion criteria.

379 **Figure 2.** Dose-response relationships between time of PPIs use and kidney stones

380 (A) Time of PPIs use and kidney stones; (B) Time of PPIs use and recurrent kidney stones.

381 Abbreviations: OR, odds ratio; PPIs, proton pump inhibitors. Adjusted for age, sex, race, education

60

level, smoking, alcohol consumption, BMI, mean arterial pressure, HbA1c, triglycerides, history of CVD, gout, thiazide use, loop diuretics use, and H2RAs use, sedentary time, total water intake, albumin-adjusted calcium, and eGFR. The shaded part represents the 95% CI.

385

## 386 SUPPLEMENTARY FIGURE TITLE/LEGENDS

387 **Supplementary Fig 1.** Dose-response relationships between time of PPIs use and kidney stones  
388 after PSM

389 (A) Time of PPIs use and kidney stones; (B) Time of PPIs use and recurrent kidney stones.

390 Abbreviations: OR, odds ratio; PPIs, proton pump inhibitors; PSM, propensity score matching.

391 Adjusted for age, sex, race, education level, smoking, alcohol consumption, BMI, mean arterial  
392 pressure, HbA1c, triglycerides, history of CVD, gout, thiazide use, loop diuretics use, and H2RAs  
393 use, sedentary time, total water intake, albumin-adjusted calcium, and eGFR. The shaded part  
394 represents the 95% CI.

395 **Supplementary Fig 2.** Forest plot showing the association between PPI use and kidney stones

396

## 397 TABLES

**Table 1.** Demographic and clinic characteristics according to PPIs use, NHANES 2007–2018\*

| Characteristics                                             | Total Adults<br>(N = 27,075) | Non-user<br>(N = 24,643) | PPIs user<br>(N = 2,432) | P value |
|-------------------------------------------------------------|------------------------------|--------------------------|--------------------------|---------|
| Age, years, mean (SE)                                       | 47.46(0.26)                  | 46.38(0.25)              | 59.05(0.47)              | < 0.001 |
| Female, n (%)                                               | 13711(51.13)                 | 12335(50.63)             | 1376(56.43)              | < 0.001 |
| Race (Non-Hispanic White), n (%)                            | 11470(66.93)                 | 10153(65.94)             | 1317(77.61)              | < 0.001 |
| Education, n (%)                                            |                              |                          |                          | < 0.001 |
| Grades 0–12                                                 | 6368(23.03)                  | 5671(14.72)              | 697(17.85)               |         |
| High school graduate/GED                                    | 6189(14.99)                  | 5593(22.69)              | 596(26.69)               |         |
| Some college or above                                       | 14518(61.98)                 | 13379(62.58)             | 1139(55.46)              |         |
| Smoking <sup>†</sup> , n (%)                                | 5477(19.65)                  | 5035(19.81)              | 442(17.93)               | 0.143   |
| Alcohol consumption, n (%)                                  | 6469(26.38)                  | 6010(26.73)              | 459(22.63)               | 0.017   |
| BMI, kg/m <sup>2</sup> , mean (SE)                          | 29.05(0.09)                  | 28.88(0.09)              | 30.89(0.22)              | < 0.001 |
| Weight status (≥ 25 kg/m <sup>2</sup> ), n (%) <sup>‡</sup> | 19423(70.54)                 | 17439(69.47)             | 1984(81.95)              | < 0.001 |
| Sedentary time, hours/day, mean<br>(SE)                     | 368.10(2.86)                 | 365.58(2.96)             | 395.13(5.96)             | < 0.001 |
| Mean arterial pressure, mmHg,<br>mean (SE)                  | 87.98(0.16)                  | 87.83(0.17)              | 89.59(0.35)              | < 0.001 |
| Total water intake, g, mean (SE)                            | 1171.48(15.90)               | 1180.99(16.29)           | 1069.41(30.63)           | < 0.001 |
| HbA1c, %, mean (SE)                                         | 5.63(0.01)                   | 5.61(0.01)               | 5.89(0.03)               | < 0.001 |

|                                                    |             |             |             |         |
|----------------------------------------------------|-------------|-------------|-------------|---------|
| <b>Triglycerides, mmol/L, mean (SE)</b>            | 1.75(0.02)  | 1.73(0.02)  | 1.97(0.04)  | < 0.001 |
| <b>Albumin-adjusted calcium, mmol/L, mean (SE)</b> | 2.28(0.00)  | 2.28(0.00)  | 2.30(0.00)  | < 0.001 |
| <b>eGFR, mL/min, mean (SE)</b>                     | 94.33(0.33) | 95.55(0.33) | 81.23(0.61) | < 0.001 |
| <b>Gout, n (%)</b>                                 | 403(1.25)   | 309(1.07)   | 94(3.23)    | < 0.001 |
| <b>CVD, n (%)</b>                                  | 2595(9.584) | 2050(6.641) | 545(17.438) | < 0.001 |
| Congestive heart failure                           | 805(2.20)   | 589(1.76)   | 216(6.88)   | < 0.001 |
| Coronary heart disease                             | 1080(3.34)  | 829(2.87)   | 251(8.39)   | < 0.001 |
| Myocardial infarction                              | 1082(3.01)  | 828(2.56)   | 254(7.82)   | < 0.001 |
| Stroke                                             | 984(2.78)   | 788(2.43)   | 196(6.47)   | < 0.001 |
| <b>Thiazide user, n (%)</b>                        | 2748(8.66)  | 2256(7.81)  | 492(17.75)  | < 0.001 |
| <b>Loop diuretics user, n (%)</b>                  | 876(2.46)   | 626(1.91)   | 250(8.35)   | < 0.001 |
| <b>H2RAs user, n (%)</b>                           | 643(2.33)   | 550(2.26)   | 93(3.12)    | 0.030   |
| <b>Kidney stones, n (%)</b>                        | 2589(9.80)  | 2217(9.23)  | 372(15.88)  | < 0.001 |

398 Abbreviations: NHANES, National Health and Nutrition Examination Survey; PPIs, proton pump inhibitors; SE, standard error;  
 399 GED, General Equivalency Diploma; BMI, body mass index; eGFR, effective glomerular filtration rate; CVD, cardiovascular  
 400 disease; H2RAs, H2-receptor antagonist.

401 \*Means and percentages were adjusted for survey weights of NHANES.

402 †Smoking was defined as smoking at least 100 cigarettes during their lifetime.

403 ‡BMI was calculated by dividing weight in kilograms (kg) by height in meters squared (m<sup>2</sup>). Participants were classified as  
 404 normal weight (BMI < 25 kg/m<sup>2</sup>), and overweight/obese (BMI ≥ 25 kg/m<sup>2</sup>).

405

**Table 2.** OR (95% CI) for kidney stones across PPIs use\*

|                                                                                               | Crude model     | Model 1         | Model 2         | Model 3         |
|-----------------------------------------------------------------------------------------------|-----------------|-----------------|-----------------|-----------------|
| <b>Kidney stones (N = 2,589) vs non-kidney stone (N = 24,486) (NHANES 2007–2018)</b>          |                 |                 |                 |                 |
| <b>PPIs use</b>                                                                               |                 |                 |                 |                 |
| No                                                                                            | 1[Reference]    | 1[Reference]    | 1[Reference]    | 1[Reference]    |
| Yes                                                                                           | 1.86(1.55,2.22) | 1.42(1.18,1.72) | 1.32(1.09,1.61) | 1.31(1.07,1.60) |
| <b>Time of use (years)</b>                                                                    | 1.09(1.07,1.12) | 1.05(1.02,1.08) | 1.04(1.01,1.07) | 1.04(1.01,1.07) |
| <b>Recurrent kidney stones (N = 550) vs first kidney stone (N = 1,138) (NHANES 2007–2014)</b> |                 |                 |                 |                 |
| <b>PPIs use</b>                                                                               |                 |                 |                 |                 |
| No                                                                                            | 1[Reference]    | 1[Reference]    | 1[Reference]    | 1[Reference]    |
| Yes                                                                                           | 1.49(1.05,2.09) | 1.49(1.05,2.13) | 1.47(1.03,2.10) | 1.49(1.04,2.13) |
| <b>Time of use (years)</b>                                                                    | 1.07(1.01,1.12) | 1.06(1.01,1.12) | 1.06(1.01,1.12) | 1.07(1.01,1.13) |

406 Abbreviations: OR, odds ratio; CI, confidence interval; PPIs, proton pump inhibitors.

407 \*Values are numerical values or weighted OR (95% CI).

408 Model 1 was adjusted for age, sex, race, education level, smoking, and alcohol consumption;

409 Model 2 was adjusted for age, sex, race, education level, smoking, alcohol consumption, BMI, mean arterial pressure, HbA1c,  
 410 triglycerides, history of CVD, thiazide use, loop diuretics use, and H2RAs use.

411 Model 3 was additionally adjusted for sedentary time, total water intake, albumin-adjusted calcium, eGFR and history of gout.

412

**Table 3.** OR (95% CI) for kidney stones across time of PPIs use stratified by selected factors\*

|  | Kidney stones vs non-kidney stone | Recurrent kidney stones vs first kidney stone |
|--|-----------------------------------|-----------------------------------------------|
|--|-----------------------------------|-----------------------------------------------|

|                        | OR (95% CI)      | P value | P for interaction | OR (95% CI)      | P value | P for interaction |
|------------------------|------------------|---------|-------------------|------------------|---------|-------------------|
| <b>Age</b>             |                  |         | 0.439             |                  |         | 0.419             |
| < 50 years             | 1.05(0.98, 1.11) | 0.150   |                   | 1.11(0.98, 1.27) | 0.104   |                   |
| ≥ 50 years             | 1.04(1.01,1.07)  | 0.004   |                   | 1.07(1.00,1.14)  | 0.053   |                   |
| <b>Sex</b>             |                  |         | 0.856             |                  |         | 0.623             |
| Female                 | 1.06(1.02,1.10)  | 0.004   |                   | 1.08(0.99,1.18)  | 0.099   |                   |
| Male                   | 1.02(0.98,1.07)  | 0.258   |                   | 1.06(0.98,1.14)  | 0.156   |                   |
| <b>Race</b>            |                  |         | 0.365             |                  |         | 0.282             |
| Non-Hispanic           |                  |         |                   |                  |         |                   |
| White                  | 1.04(1.01,1.07)  | 0.005   |                   | 1.11(1.01, 1.22) | 0.037   |                   |
| Other                  | 1.02(0.98,1.06)  | 0.422   |                   | 1.07(1.00,1.13)  | 0.038   |                   |
| <b>BMI</b>             |                  |         | 0.684             |                  |         | 0.922             |
| < 25 kg/m <sup>2</sup> | 1.06(0.98,1.14)  | 0.134   |                   | 1.04(0.90, 1.22) | 0.569   |                   |
| ≥ 25 kg/m <sup>2</sup> | 1.04(1.01,1.06)  | 0.013   |                   | 1.07(1.01,1.15)  | 0.029   |                   |

413 Abbreviations: OR, odds ratio; CI, confidence interval; PPIs, proton pump inhibitors; BMI, body mass index.

414 \*Values are numerical values or weighted OR (95% CI).

415 Adjusted for age, sex, race, education level, smoking, alcohol consumption, BMI, mean arterial pressure, HbA1c, triglycerides,  
 416 history of CVD, gout, thiazide use, loop diuretics use, and H2RAs use, sedentary time, total water intake, albumin-adjusted  
 417 calcium, and eGFR, if not already stratified.

1  
2  
3  
4  
5  
6  
7  
8  
9  
10  
11  
12  
13  
14  
15  
16  
17  
18  
19  
20  
21  
22  
23  
24  
25  
26  
27  
28  
29  
30  
31  
32  
33  
34  
35  
36  
37  
38  
39  
40  
41  
42  
43  
44  
45  
46  
47  
48  
49  
50  
51  
52  
53  
54  
55  
56  
57  
58  
59  
60

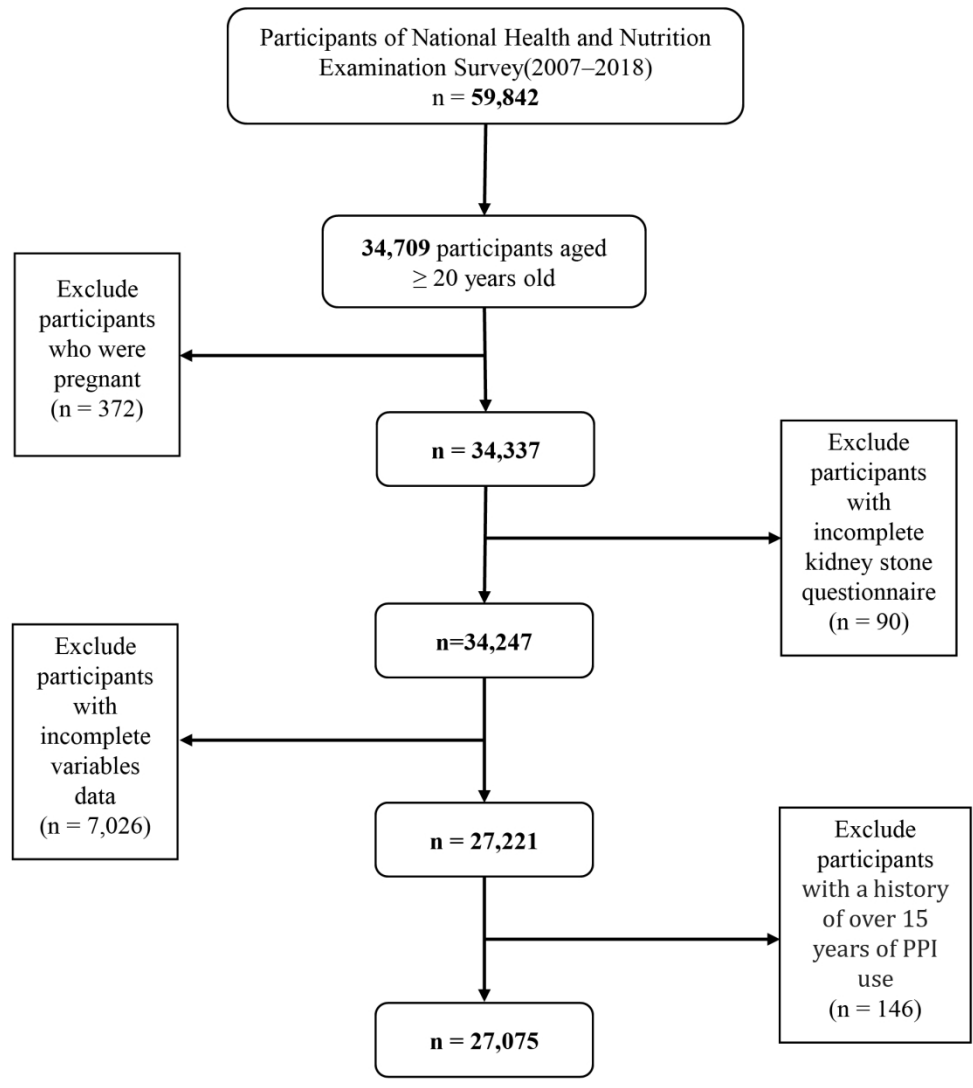

Fig. 1 Study flowchart. Of 59,842 participants in the 2007–2018 National Health and Nutrition Examination Survey (NHANES), 27,075 remained after fulfilling inclusion and exclusion criteria.

169x190mm (300 x 300 DPI)



36 Fig. 2 Dose-response relationships between time of PPIs use and kidney stones. (A) Time of PPIs use and  
 37 kidney stones; (B) Time of PPIs use and recurrent kidney stones.

38 Abbreviations: OR, odds ratio; PPIs, proton pump inhibitors. Adjusted for age, sex, race, education level,  
 39 smoking, alcohol consumption, BMI, mean arterial pressure, HbA1c, triglycerides, history of CVD, gout,  
 40 thiazide use, loop diuretics use, and H2RAs use, sedentary time, total water intake, albumin-adjusted  
 41 calcium, and eGFR. The shaded part represents the 95% CI.

42  
43 263x243mm (300 x 300 DPI)

A

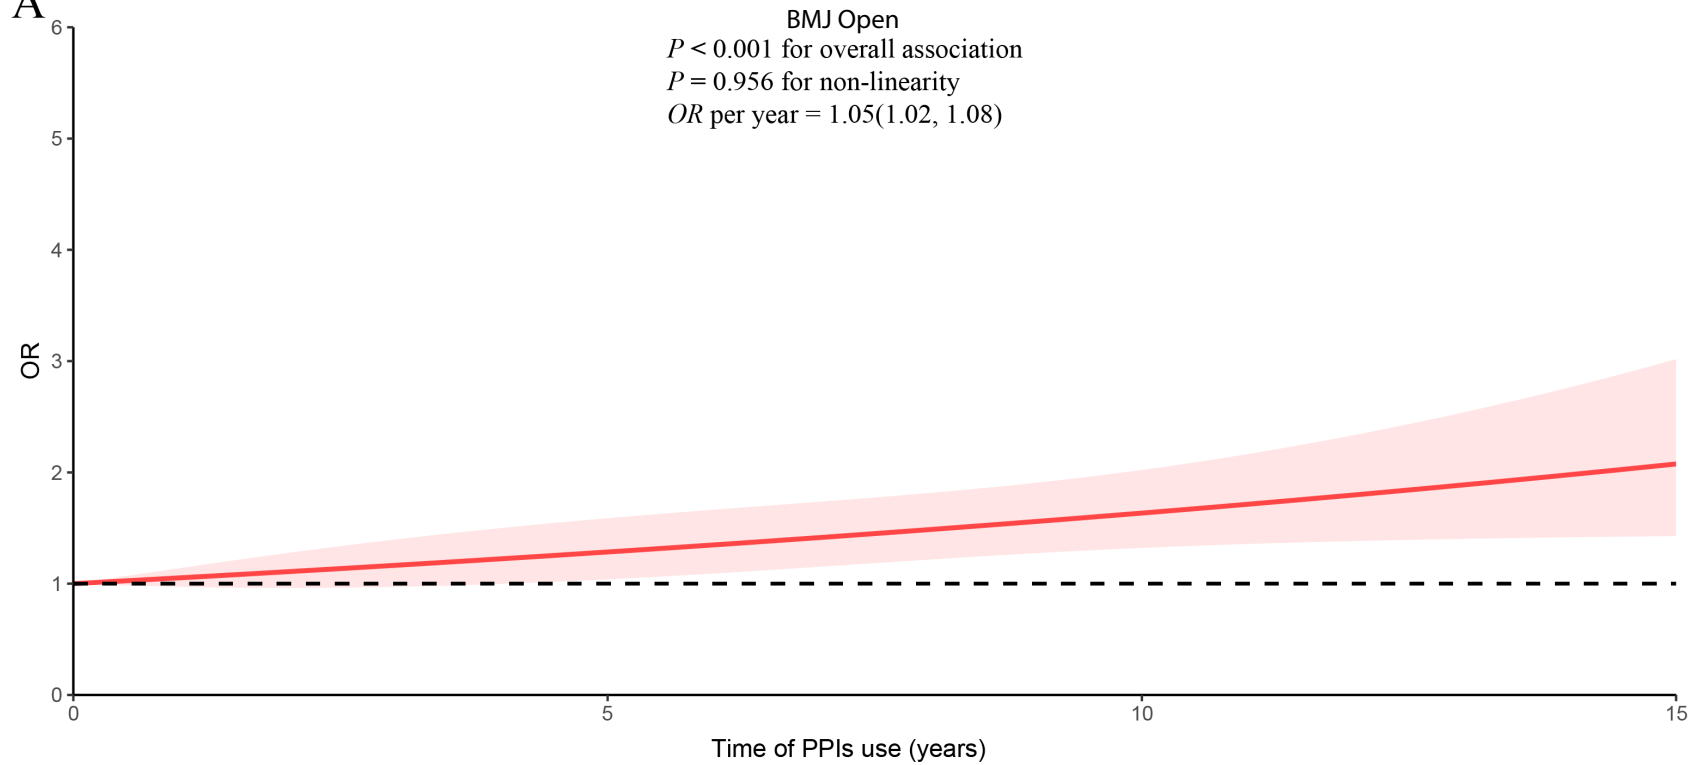

B

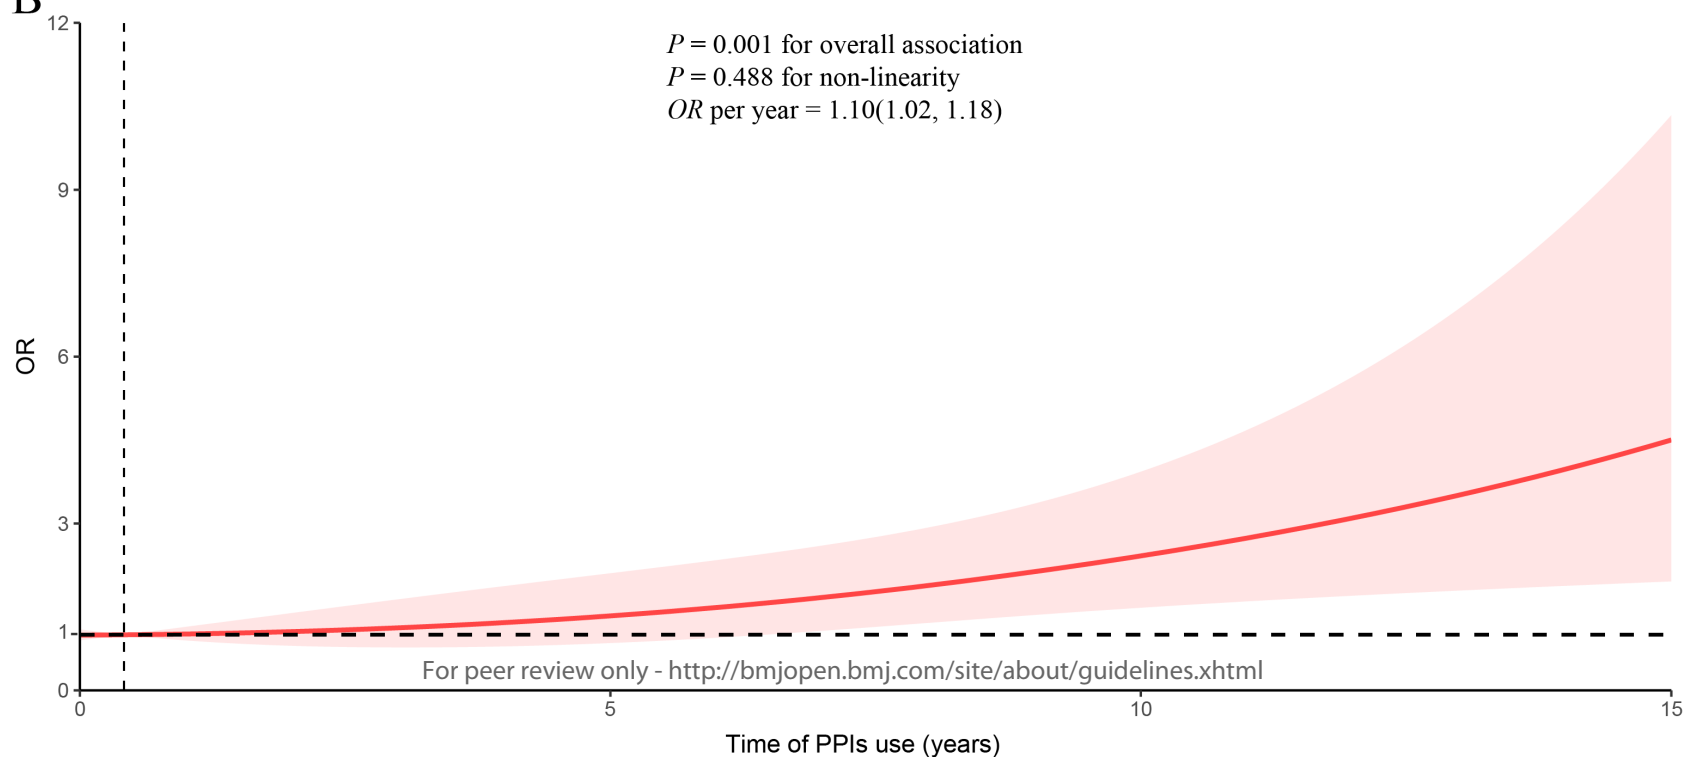

1  
2  
3  
4  
5  
6  
7  
8  
9  
10  
11  
12  
13  
14  
15  
16  
17  
18  
19  
20  
21  
22  
23  
24  
25  
26  
27  
28  
29  
30  
31  
32  
33  
34  
35  
36  
37  
38  
39  
40  
41  
42  
43  
44  
45  
46



| Study                       | HR/OR                                                                               | HR/OR | 95%CI        | Weight (fixed) | Weight (random) |
|-----------------------------|-------------------------------------------------------------------------------------|-------|--------------|----------------|-----------------|
| <b>The present study</b>    |  | 1.31  | [1.07; 1.60] | 3.8%           | 23.7%           |
| Sui et al. 2022             |  | 1.19  | [1.06; 1.34] | 11.2%          | 25.1%           |
| Kim et al. 2022             |  | 2.49  | [2.33; 2.66] | 35.1%          | 25.6%           |
| Simonov et al. 2021         |  | 1.25  | [1.19; 1.33] | 49.8%          | 25.6%           |
| <b>Fixed effect model</b>   |  | 1.59  | [1.53; 1.65] | 100.0%         | --              |
| <b>Random effects model</b> |  | 1.49  | [1.05; 2.10] | --             | 100.0%          |

For peer review only - <http://bmjopen.bmj.com/site/about/guidelines.xhtml>

1 2 3

1  
2  
3  
4  
5  
6  
7  
8  
9  
10  
11

Supplementary Table 1. Collinearity analysis

| <b>Variables</b>         | <b>VIF</b> |
|--------------------------|------------|
| Age                      | 3.80       |
| Sex                      | 1.54       |
| Race/ethnicity           | 1.85       |
| Education                | 2.50       |
| Smoking                  | 2.08       |
| Alcohol consumption      | 1.75       |
| BMI                      | 1.26       |
| Sedentary time           | 1.54       |
| Mean arterial pressure   | 1.25       |
| Total water intake       | 1.99       |
| HbA1c                    | 1.81       |
| Triglycerides            | 1.44       |
| Albumin-adjusted calcium | 1.97       |
| eGFR                     | 3.72       |
| CVD                      | 1.77       |
| Thiazide use             | 1.78       |
| Loop diuretics use       | 1.56       |
| H2RAs use                | 1.27       |

Abbreviations: VIF, variance inflation factor; BMI, body mass index; eGFR, effective glomerular filtration rate; CVD, cardiovascular disease; H2RAs, H2-receptor antagonist.

Supplementary Table 2. Akaike information criterion (AIC) and P-value for non-linearity of restricted cubic splines models across different knots

| The occurrence of kidney stones |          |                     | The recurrence of kidney stones |         |                     |
|---------------------------------|----------|---------------------|---------------------------------|---------|---------------------|
| Knots                           | AIC      | P for non-linearity | Knots                           | AIC     | P for non-linearity |
| 3                               | 16664.48 | 0.651               | 3                               | 2167.76 | 0.484               |
| 4                               | 16664.67 | 0.071               | 4                               | 2170.74 | 0.594               |
| 5                               | 16667.34 | 0.108               | 5                               | 2169.07 | 0.146               |

For peer review only

Supplementary Table 3. Demographic and clinic characteristics according to PPIs use after PSM. NHANES 2007–2018\*

| Characteristics                                                   | Total Adults<br>(N = 4,864) | Non-user<br>(N = 2,432) | PPIs user<br>(N = 2,432) | P value |
|-------------------------------------------------------------------|-----------------------------|-------------------------|--------------------------|---------|
| Age, years, mean (SE)                                             | 59.15(0.35)                 | 59.24(0.42)             | 59.05(0.47)              | 0.733   |
| Female, n (%)                                                     | 2679(56.73)                 | 1303(57.02)             | 1376(56.43)              | 0.800   |
| Race (Non-Hispanic White), n (%)                                  | 2634(78.13)                 | 1317(78.63)             | 1317(77.61)              | 0.460   |
| Education, n (%)                                                  |                             |                         |                          | 0.760   |
| Grades 0–12                                                       | 1379(17.54)                 | 682(17.24)              | 697(17.85)               |         |
| High school graduate/GED                                          | 1217(26.31)                 | 621(25.95)              | 596(26.69)               |         |
| Some college or above                                             | 2268(56.14)                 | 1129(56.80)             | 1139(55.46)              |         |
| Smoking <sup>†</sup> , n (%)                                      | 904(18.71)                  | 462(19.46)              | 442(17.93)               | 0.715   |
| Alcohol consumption, n (%)                                        | 952(22.76)                  | 493(22.89)              | 459(22.63)               | 0.902   |
| BMI, kg/m <sup>2</sup> , mean (SE)                                | 30.64(0.17)                 | 30.41(0.23)             | 30.89(0.22)              | 0.113   |
| Weight status ( $\geq 25$ kg/m <sup>2</sup> ), n (%) <sup>‡</sup> | 4013(82.25)                 | 2029(82.531)            | 1984(81.948)             | 0.715   |
| Sedentary time, hours/day, mean (SE)                              | 390.48(4.72)                | 386.03(6.16)            | 395.13(5.96)             | 0.236   |
| Mean arterial pressure, mmHg, mean (SE)                           | 89.92(0.29)                 | 90.25(0.40)             | 89.59(0.35)              | 0.194   |
| Total water intake, g, mean (SE)                                  | 1058.14(24.20)              | 1047.33(32.08)          | 1069.41(30.63)           | 0.582   |
| HbA1c, %, mean (SE)                                               | 5.89(0.02)                  | 5.89(0.03)              | 5.89(0.03)               | 0.917   |
| Triglycerides, mmol/L, mean (SE)                                  | 1.96(0.03)                  | 1.95(0.03)              | 1.97(0.04)               | 0.716   |
| Albumin-adjusted calcium, mmol/L, mean (SE)                       | 2.30(0.00)                  | 2.30(0.00)              | 2.30(0.00)               | 0.939   |
| eGFR, mL/min, mean (SE)                                           | 81.68(0.45)                 | 82.11(0.63)             | 81.23(0.61)              | 0.306   |
| Gout, n (%)                                                       | 169(2.83)                   | 75(2.44)                | 94(3.23)                 | 0.216   |
| CVD history, n (%)                                                | 989(20.33)                  | 444(14.83)              | 545(17.44)               | 0.070   |
| Thiazide user, n (%)                                              | 983(17.98)                  | 491(18.20)              | 492(17.75)               | 0.776   |
| Loop diuretics user, n (%)                                        | 436(7.13)                   | 186(5.97)               | 250(8.35)                | 0.016   |
| H2RAs user, n (%)                                                 | 168(3.11)                   | 75(3.10)                | 93(3.12)                 | 0.979   |
| Kidney stones, n (%)                                              | 658(13.51)                  | 286(11.23)              | 372(15.88)               | 0.002   |

Abbreviations: PPIs, proton pump inhibitors; PSM, propensity score matching; NHANES, National Health and Nutrition Examination Survey; SE, standard error; GED, General Equivalency Diploma; BMI, body mass index; eGFR, effective glomerular filtration rate; CVD, cardiovascular disease; H2RAs, H2-receptor antagonist.

\*Means and percentages were adjusted for survey weights of NHANES.

<sup>†</sup>Smoking was defined as smoking at least 100 cigarettes during their lifetime.

<sup>‡</sup>BMI was calculated by dividing weight in kilograms (kg) by height in meters squared (m<sup>2</sup>). Participants were classified as normal weight (BMI < 25 kg/m<sup>2</sup>), and overweight/obese (BMI  $\geq$  25 kg/m<sup>2</sup>).

Supplementary Table 4. Sensitivity analyses of the associations between kidney stones and PPIs use after additional adjustment for vitamin C intake, caffeine intake and dietary inflammation index\*

|                                                                                               | Model ( <i>OR</i> [95% <i>CI</i> ]) | <i>P</i> -value |
|-----------------------------------------------------------------------------------------------|-------------------------------------|-----------------|
| <b>Kidney stones (N = 2,589) VS Non-kidney stone (N = 24,486) (NHANES 2007–2018)</b>          |                                     |                 |
| <b>PPIs use</b>                                                                               |                                     |                 |
| No                                                                                            | 1[Reference]                        | 0.01            |
| Yes                                                                                           | 1.31(1.07,1.60)                     |                 |
| <b>Time of use (years)</b>                                                                    | 1.04(1.01,1.07)                     | 0.004           |
| <b>Recurrent kidney stones (N = 550) VS first kidney stone (N = 1,138) (NHANES 2007–2014)</b> |                                     |                 |
| <b>PPIs use</b>                                                                               |                                     |                 |
| No                                                                                            | 1[Reference]                        | 0.03            |
| Yes                                                                                           | 1.49(1.04,2.13)                     |                 |
| <b>Time of use (years)</b>                                                                    | 1.07(1.01,1.13)                     | 0.03            |

Abbreviations: *OR*, odds ratio; *CI*, confidence interval; PPIs, proton pump inhibitors.

\*Values are numerical values or weighted *OR* (95% *CI*).

Model was adjusted for age, sex, race, education level, smoking, alcohol consumption, BMI, mean arterial pressure, HbA1c, triglycerides, history of CVD, thiazide use, loop diuretics use, H2RAs use, sedentary time, total water intake, albumin-adjusted calcium, eGFR history of gout, vitamin C intake, caffeine intake and dietary inflammation index.

1  
2  
3  
4  
5  
6  
7  
8  
9  
10  
11  
12  
13  
14  
15  
16  
17  
18  
19  
20  
21  
22  
23  
24  
25  
26  
27  
28  
29  
30  
31  
32  
33  
34  
35  
36  
37  
38  
39  
40  
41  
42  
43  
44  
45  
46  
47  
48  
49  
50  
51  
52  
53  
54  
55  
56  
57  
58  
59  
60

For peer review only

**STROBE 2007 (v4) Statement—Checklist of items that should be included in reports of *cross-sectional studies***

| Section/Topic                | Item # | Recommendation                                                                                                                                                                       | Reported on page # |
|------------------------------|--------|--------------------------------------------------------------------------------------------------------------------------------------------------------------------------------------|--------------------|
| <b>Title and abstract</b>    | 1      | (a) Indicate the study's design with a commonly used term in the title or the abstract                                                                                               | 1                  |
|                              |        | (b) Provide in the abstract an informative and balanced summary of what was done and what was found                                                                                  | 1-2                |
| <b>Introduction</b>          |        |                                                                                                                                                                                      |                    |
| Background/rationale         | 2      | Explain the scientific background and rationale for the investigation being reported                                                                                                 | 2-3                |
| Objectives                   | 3      | State specific objectives, including any prespecified hypotheses                                                                                                                     | 3                  |
| <b>Methods</b>               |        |                                                                                                                                                                                      |                    |
| Study design                 | 4      | Present key elements of study design early in the paper                                                                                                                              | 3                  |
| Setting                      | 5      | Describe the setting, locations, and relevant dates, including periods of recruitment, exposure, follow-up, and data collection                                                      | 3-4                |
| Participants                 | 6      | (a) Give the eligibility criteria, and the sources and methods of selection of participants                                                                                          | 3-4                |
| Variables                    | 7      | Clearly define all outcomes, exposures, predictors, potential confounders, and effect modifiers. Give diagnostic criteria, if applicable                                             | 3-4                |
| Data sources/<br>measurement | 8*     | For each variable of interest, give sources of data and details of methods of assessment (measurement). Describe comparability of assessment methods if there is more than one group | 3-4                |
| Bias                         | 9      | <i>Describe any efforts to address potential sources of bias</i>                                                                                                                     | 3-4                |
| Study size                   | 10     | Explain how the study size was arrived at                                                                                                                                            | 3                  |
| Quantitative variables       | 11     | Explain how quantitative variables were handled in the analyses. If applicable, describe which groupings were chosen and why                                                         | 3-4                |
| Statistical methods          | 12     | (a) Describe all statistical methods, including those used to control for confounding                                                                                                | 4-5                |
|                              |        | (b) Describe any methods used to examine subgroups and interactions                                                                                                                  | 4-5                |
|                              |        | (c) Explain how missing data were addressed                                                                                                                                          | 4-5                |
|                              |        | (d) If applicable, describe analytical methods taking account of sampling strategy                                                                                                   | 4-5                |
|                              |        | (e) Describe any sensitivity analyses                                                                                                                                                | 4-5                |
| <b>Results</b>               |        |                                                                                                                                                                                      |                    |

|                          |     |                                                                                                                                                                                                              |      |
|--------------------------|-----|--------------------------------------------------------------------------------------------------------------------------------------------------------------------------------------------------------------|------|
| Participants             | 13* | (a) Report numbers of individuals at each stage of study—eg numbers potentially eligible, examined for eligibility, confirmed eligible, included in the study, completing follow-up, and analysed            | 5    |
|                          |     | (b) Give reasons for non-participation at each stage                                                                                                                                                         | 3, 5 |
|                          |     | (c) Consider use of a flow diagram                                                                                                                                                                           | 5    |
| Descriptive data         | 14* | (a) Give characteristics of study participants (eg demographic, clinical, social) and information on exposures and potential confounders                                                                     | 5    |
|                          |     | (b) Indicate number of participants with missing data for each variable of interest                                                                                                                          | 5    |
| Outcome data             | 15* | Report numbers of outcome events or summary measures                                                                                                                                                         | 6-7  |
| Main results             | 16  | (a) Give unadjusted estimates and, if applicable, confounder-adjusted estimates and their precision (eg, 95% confidence interval). Make clear which confounders were adjusted for and why they were included | 6-7  |
|                          |     | (b) Report category boundaries when continuous variables were categorized                                                                                                                                    | 6-7  |
|                          |     | (c) If relevant, consider translating estimates of relative risk into absolute risk for a meaningful time period                                                                                             | 6-7  |
| Other analyses           | 17  | Report other analyses done—eg analyses of subgroups and interactions, and sensitivity analyses                                                                                                               | 7    |
| <b>Discussion</b>        |     |                                                                                                                                                                                                              |      |
| Key results              | 18  | Summarise key results with reference to study objectives                                                                                                                                                     | 7    |
| Limitations              | 19  | Discuss limitations of the study, taking into account sources of potential bias or imprecision. Discuss both direction and magnitude of any potential bias                                                   | 9    |
| Interpretation           | 20  | Give a cautious overall interpretation of results considering objectives, limitations, multiplicity of analyses, results from similar studies, and other relevant evidence                                   | 7-9  |
| Generalisability         | 21  | Discuss the generalisability (external validity) of the study results                                                                                                                                        | 7-9  |
| <b>Other information</b> |     |                                                                                                                                                                                                              |      |
| Funding                  | 22  | Give the source of funding and the role of the funders for the present study and, if applicable, for the original study on which the present article is based                                                | 10   |

\*Give information separately for cases and controls in case-control studies and, if applicable, for exposed and unexposed groups in cohort and cross-sectional studies.

**Note:** An Explanation and Elaboration article discusses each checklist item and gives methodological background and published examples of transparent reporting. The STROBE checklist is best used in conjunction with this article (freely available on the Web sites of PLoS Medicine at <http://www.plosmedicine.org/>, Annals of Internal Medicine at <http://www.annals.org/>, and Epidemiology at <http://www.epidem.com/>). Information on the STROBE Initiative is available at [www.strobe-statement.org](http://www.strobe-statement.org).
