# Supplementary material for: Association of proton pump inhibitor use with risk of kidney stones: an analysis of cross-sectional data from the US National Health and Nutrition Examination Survey (2007–2018)
Source: PubMed Central journal article supplement — BMJ Open. 2023 Oct 16;13(10):e075136. doi: 10.1136/bmjopen-2023-075136 (PMC10582914; doi:10.1136/bmjopen-2023-075136), 2023-10-16
Supplement: bmjopen-2023-075136supp001.pdf [file bmjopen-2023-075136supp001.pdf]

Supplementary Table 1. Collinearity analysis

| <b>Variables</b>         | <b>VIF</b> |
|--------------------------|------------|
| Age                      | 3.80       |
| Sex                      | 1.54       |
| Race/ethnicity           | 1.85       |
| Education                | 2.50       |
| Smoking                  | 2.08       |
| Alcohol consumption      | 1.75       |
| BMI                      | 1.26       |
| Sedentary time           | 1.54       |
| Mean arterial pressure   | 1.25       |
| Total water intake       | 1.99       |
| HbA1c                    | 1.81       |
| Triglycerides            | 1.44       |
| Albumin-adjusted calcium | 1.97       |
| eGFR                     | 3.72       |
| CVD                      | 1.77       |
| Thiazide use             | 1.78       |
| Loop diuretics use       | 1.56       |
| H2RAs use                | 1.27       |

Abbreviations: VIF, variance inflation factor; BMI, body mass index; eGFR, effective glomerular filtration rate; CVD, cardiovascular disease; H2RAs, H2-receptor antagonist.
