# Supplementary material for: Association of proton pump inhibitor use with risk of kidney stones: an analysis of cross-sectional data from the US National Health and Nutrition Examination Survey (2007–2018)
Source: PubMed Central journal article supplement — BMJ Open. 2023 Oct 16;13(10):e075136. doi: 10.1136/bmjopen-2023-075136 (PMC10582914; doi:10.1136/bmjopen-2023-075136), 2023-10-16
Supplement: bmjopen-2023-075136supp002.pdf [file bmjopen-2023-075136supp002.pdf]

Supplementary Table 2. Akaike information criterion (AIC) and P-value for non-linearity of restricted cubic splines models across different knots

| The occurrence of kidney stones |          |                     | The recurrence of kidney stones |         |                     |
|---------------------------------|----------|---------------------|---------------------------------|---------|---------------------|
| Knots                           | AIC      | P for non-linearity | Knots                           | AIC     | P for non-linearity |
| 3                               | 16664.48 | 0.651               | 3                               | 2167.76 | 0.484               |
| 4                               | 16664.67 | 0.071               | 4                               | 2170.74 | 0.594               |
| 5                               | 16667.34 | 0.108               | 5                               | 2169.07 | 0.146               |
