# Supplementary material for: Association of proton pump inhibitor use with risk of kidney stones: an analysis of cross-sectional data from the US National Health and Nutrition Examination Survey (2007–2018)
Source: PubMed Central journal article supplement — BMJ Open. 2023 Oct 16;13(10):e075136. doi: 10.1136/bmjopen-2023-075136 (PMC10582914; doi:10.1136/bmjopen-2023-075136), 2023-10-16
Supplement: bmjopen-2023-075136supp003.pdf [file bmjopen-2023-075136supp003.pdf]

Supplementary Table 3. Demographic and clinic characteristics according to PPIs use after PSM. NHANES 2007–2018\*

| Characteristics                                                   | Total Adults<br>(N = 4,864) | Non-user<br>(N = 2,432) | PPIs user<br>(N = 2,432) | P value |
|-------------------------------------------------------------------|-----------------------------|-------------------------|--------------------------|---------|
| Age, years, mean (SE)                                             | 59.15(0.35)                 | 59.24(0.42)             | 59.05(0.47)              | 0.733   |
| Female, n (%)                                                     | 2679(56.73)                 | 1303(57.02)             | 1376(56.43)              | 0.800   |
| Race (Non-Hispanic White), n (%)                                  | 2634(78.13)                 | 1317(78.63)             | 1317(77.61)              | 0.460   |
| Education, n (%)                                                  |                             |                         |                          | 0.760   |
| Grades 0–12                                                       | 1379(17.54)                 | 682(17.24)              | 697(17.85)               |         |
| High school graduate/GED                                          | 1217(26.31)                 | 621(25.95)              | 596(26.69)               |         |
| Some college or above                                             | 2268(56.14)                 | 1129(56.80)             | 1139(55.46)              |         |
| Smoking <sup>†</sup> , n (%)                                      | 904(18.71)                  | 462(19.46)              | 442(17.93)               | 0.715   |
| Alcohol consumption, n (%)                                        | 952(22.76)                  | 493(22.89)              | 459(22.63)               | 0.902   |
| BMI, kg/m <sup>2</sup> , mean (SE)                                | 30.64(0.17)                 | 30.41(0.23)             | 30.89(0.22)              | 0.113   |
| Weight status ( $\geq 25$ kg/m <sup>2</sup> ), n (%) <sup>‡</sup> | 4013(82.25)                 | 2029(82.531)            | 1984(81.948)             | 0.715   |
| Sedentary time, hours/day, mean (SE)                              | 390.48(4.72)                | 386.03(6.16)            | 395.13(5.96)             | 0.236   |
| Mean arterial pressure, mmHg, mean (SE)                           | 89.92(0.29)                 | 90.25(0.40)             | 89.59(0.35)              | 0.194   |
| Total water intake, g, mean (SE)                                  | 1058.14(24.20)              | 1047.33(32.08)          | 1069.41(30.63)           | 0.582   |
| HbA1c, %, mean (SE)                                               | 5.89(0.02)                  | 5.89(0.03)              | 5.89(0.03)               | 0.917   |
| Triglycerides, mmol/L, mean (SE)                                  | 1.96(0.03)                  | 1.95(0.03)              | 1.97(0.04)               | 0.716   |
| Albumin-adjusted calcium, mmol/L, mean (SE)                       | 2.30(0.00)                  | 2.30(0.00)              | 2.30(0.00)               | 0.939   |
| eGFR, mL/min, mean (SE)                                           | 81.68(0.45)                 | 82.11(0.63)             | 81.23(0.61)              | 0.306   |
| Gout, n (%)                                                       | 169(2.83)                   | 75(2.44)                | 94(3.23)                 | 0.216   |
| CVD history, n (%)                                                | 989(20.33)                  | 444(14.83)              | 545(17.44)               | 0.070   |
| Thiazide user, n (%)                                              | 983(17.98)                  | 491(18.20)              | 492(17.75)               | 0.776   |
| Loop diuretics user, n (%)                                        | 436(7.13)                   | 186(5.97)               | 250(8.35)                | 0.016   |
| H2RAs user, n (%)                                                 | 168(3.11)                   | 75(3.10)                | 93(3.12)                 | 0.979   |
| Kidney stones, n (%)                                              | 658(13.51)                  | 286(11.23)              | 372(15.88)               | 0.002   |

Abbreviations: PPIs, proton pump inhibitors; PSM, propensity score matching; NHANES, National Health and Nutrition Examination Survey; SE, standard error; GED, General Equivalency Diploma; BMI, body mass index; eGFR, effective glomerular filtration rate; CVD, cardiovascular disease; H2RAs, H2-receptor antagonist.

\*Means and percentages were adjusted for survey weights of NHANES.

<sup>†</sup>Smoking was defined as smoking at least 100 cigarettes during their lifetime.

<sup>‡</sup>BMI was calculated by dividing weight in kilograms (kg) by height in meters squared (m<sup>2</sup>). Participants were classified as normal weight (BMI < 25 kg/m<sup>2</sup>), and overweight/obese (BMI  $\geq$  25 kg/m<sup>2</sup>).
