# Supplementary material for: Association of proton pump inhibitor use with risk of kidney stones: an analysis of cross-sectional data from the US National Health and Nutrition Examination Survey (2007–2018)
Source: PubMed Central journal article supplement — BMJ Open. 2023 Oct 16;13(10):e075136. doi: 10.1136/bmjopen-2023-075136 (PMC10582914; doi:10.1136/bmjopen-2023-075136), 2023-10-16
Supplement: bmjopen-2023-075136supp005.pdf [file bmjopen-2023-075136supp005.pdf]

Supplementary Table 4. Sensitivity analyses of the associations between kidney stones and PPIs use after additional adjustment for vitamin C intake, caffeine intake and dietary inflammation index\*

|                                                                                               | Model (OR [95% CI]) | P-value |
|-----------------------------------------------------------------------------------------------|---------------------|---------|
| <b>Kidney stones (N = 2,589) VS Non-kidney stone (N = 24,486) (NHANES 2007–2018)</b>          |                     |         |
| <b>PPIs use</b>                                                                               |                     | 0.01    |
| No                                                                                            | 1[Reference]        |         |
| Yes                                                                                           | 1.31(1.07,1.60)     |         |
| <b>Time of use (years)</b>                                                                    | 1.04(1.01,1.07)     | 0.004   |
| <b>Recurrent kidney stones (N = 550) VS first kidney stone (N = 1,138) (NHANES 2007–2014)</b> |                     |         |
| <b>PPIs use</b>                                                                               |                     | 0.03    |
| No                                                                                            | 1[Reference]        |         |
| Yes                                                                                           | 1.49(1.04,2.13)     |         |
| <b>Time of use (years)</b>                                                                    | 1.07(1.01,1.13)     | 0.03    |

Abbreviations: OR, odds ratio; CI, confidence interval; PPIs, proton pump inhibitors.

\*Values are numerical values or weighted OR (95% CI).

Model was adjusted for age, sex, race, education level, smoking, alcohol consumption, BMI, mean arterial pressure, HbA1c, triglycerides, history of CVD, thiazide use, loop diuretics use, H2RAs use, sedentary time, total water intake, albumin-adjusted calcium, eGFR history of gout, vitamin C intake, caffeine intake and dietary inflammation index.
