# Supplementary figures and images for: Association of proton pump inhibitor use with risk of kidney stones: an analysis of cross-sectional data from the US National Health and Nutrition Examination Survey (2007–2018)
Source: PubMed Central journal article supplement — BMJ Open. 2023 Oct 16;13(10):e075136. doi: 10.1136/bmjopen-2023-075136 (PMC10582914; doi:10.1136/bmjopen-2023-075136), 2023-10-16

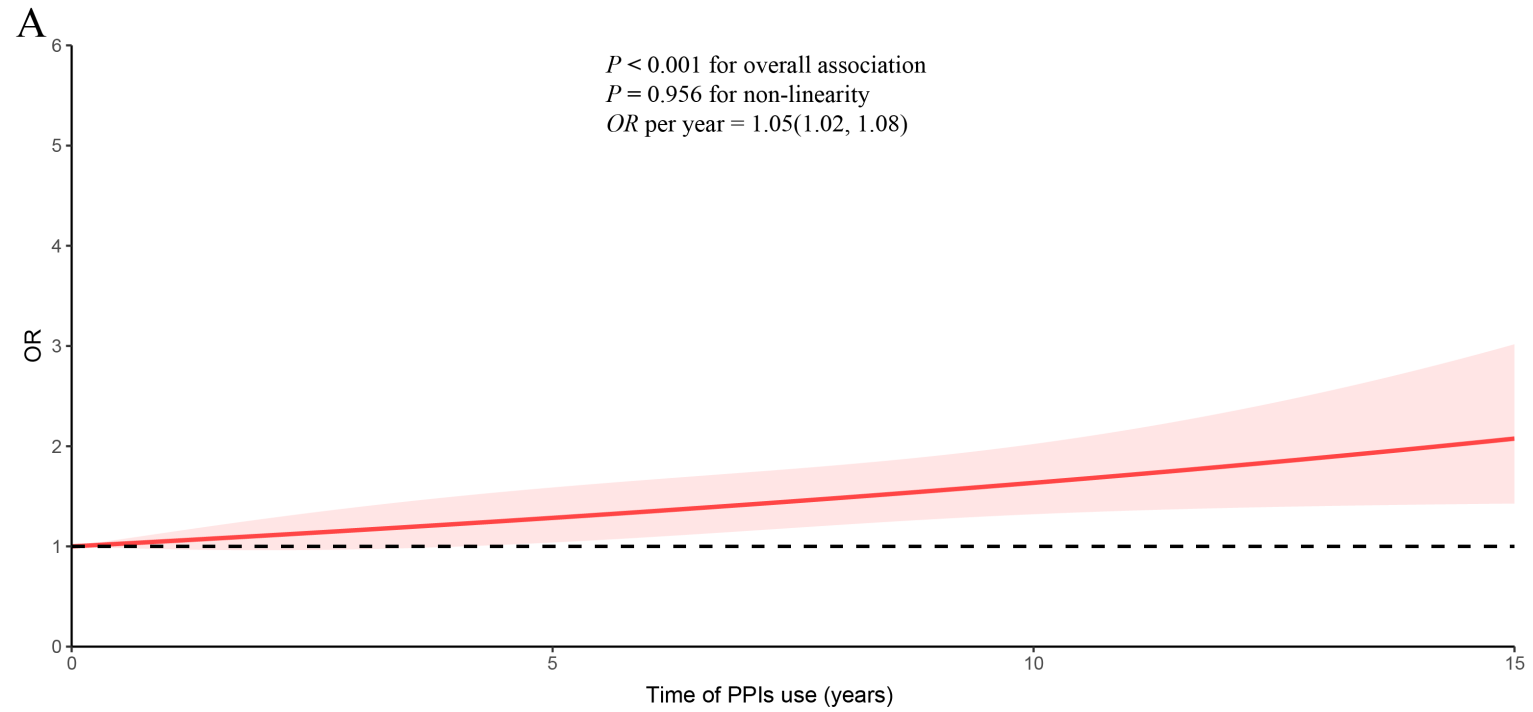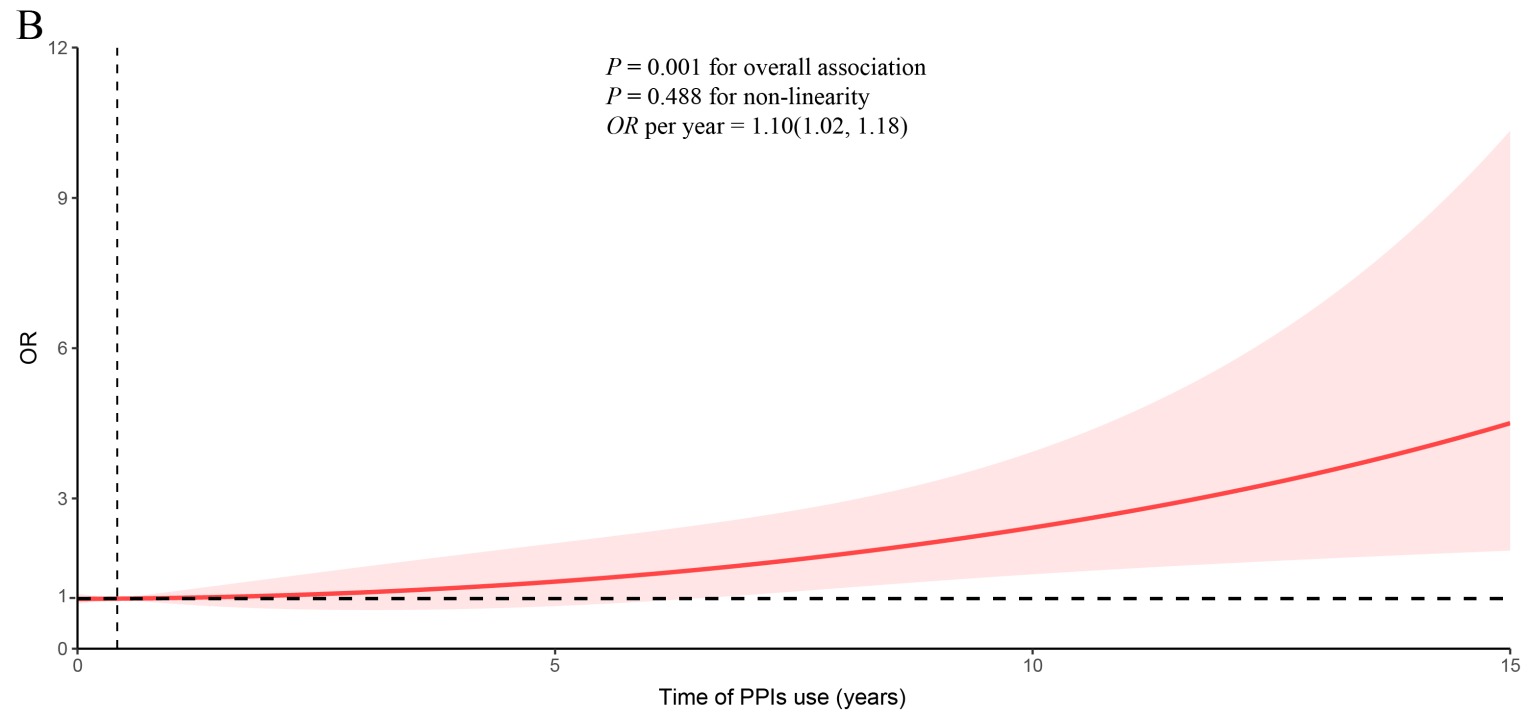

Supplement: bmjopen-2023-075136supp004.pdf [file bmjopen-2023-075136supp004.pdf]

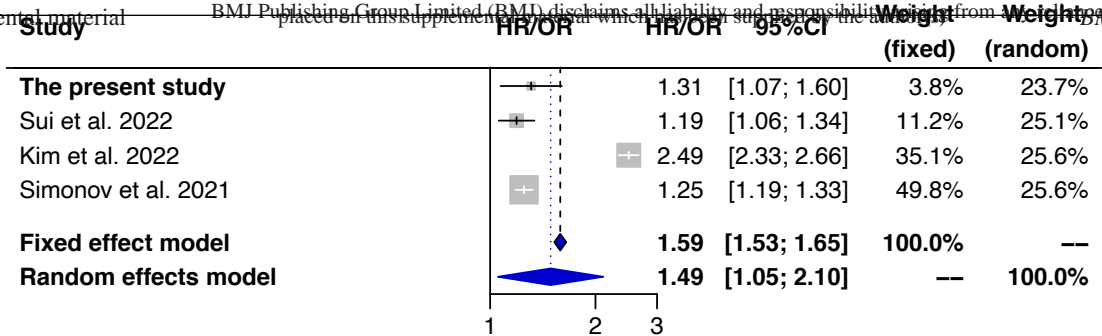

Supplement: bmjopen-2023-075136supp006.pdf [file bmjopen-2023-075136supp006.pdf]
